# Supplementary material for: Conservation of reef manta rays (Manta alfredi) in a UNESCO World Heritage Site: Large-scale island development or sustainable tourism?
Source: PLoS One. 2017 Oct 25;12(10):e0185419. doi: 10.1371/journal.pone.0185419 (PMC5656316; doi:10.1371/journal.pone.0185419)
Supplement: S1 Data — Manta 1 (PTT 122197), manta 2 (PTT 122198), and manta 3 (PTT 122199). (CSV) [file pone.0185419.s007.csv]

Program	PTT	Satellite	Location date	Location class	Latitude	Longitude	Latitude solution 2	Longitude solution 2	Number of messages	Nbr mes > - 120 dB	Best level	Pass duration	NOPC	Location index	Frequency	Altitude	Error radius	Semi-major axis	Semi-minor axis	Ellipse orientation	GDOP	Message date	Compression index	1	2	3	4	5	6	7	8	9	10	11	12	13	14	15	16	17	18	19	20	21	22	23	24	25	26
5297	122197	NL	2012/09/26 02:39:33	3	47.679	-122.138	47.679	-122.138	8	0	-125	420	3	50	401677558.480	0.000	233	578	93	97	281	2012/09/26 02:45:04	3	00	120	213	63	77	110	149
5297	122197	NM	2012/09/26 02:40:57	3	47.676	-122.135	47.676	-122.135	9	1	-119	540	3	50	401677558.940	0.000	225	1547	32	80	270	2012/09/26 02:45:04	3	00	120	213	63	77	110	149
5297	122197	MA	2012/09/26 03:26:43	3	47.679	-122.139	47.679	-122.139	8	0	-122	480	3	58	401677558.930	0.000	208	368	117	101	263	2012/09/26 03:33:04	7	00	121	213	63	77	114	145
5297	122197	NM	2012/09/26 04:21:51	2	47.676	-122.139	47.676	-122.139	5	0	-127	300	3	58	401677560.560	0.000	415	1432	119	69	715	2012/09/26 04:24:04	3	00	122	213	63	77	114	140
5297	122197	NL	2012/09/26 04:21:57	3	47.679	-122.136	47.679	-122.136	10	1	-118	720	3	50	401677559.540	0.000	207	1145	37	81	232	2012/09/26 04:27:04	5	00	122	213	63	77	114	140
5297	122197	MA	2012/09/26 05:07:03	3	47.679	-122.138	47.679	-122.138	12	5	-111	660	3	58	401677559.930	0.000	224	1871	26	79	319	2012/09/26 05:15:04	7	00	123	214	63	77	114	137
5297	122197	NL	2012/09/26 06:05:03	A	47.676	-122.137	47.676	-122.137	3	0	-130	120	3	8	401677560.920	0.000	460	1096	193	80	1257	2012/09/26 06:06:04	3	01	124	214	63	77	114	133
5297	122197	MA	2012/09/26 06:50:43	2	47.678	-122.138	47.678	-122.138	5	0	-122	300	3	58	401677561.040	0.000	377	1458	97	69	875	2012/09/26 06:54:04	2	01	124	213	63	77	114	131
5297	122197	MA							3	0	-121	178			401650000.000	0.000						2012/10/28 19:06:06	1	01	124	211	88	58	118	190
5297	122197	NL							1	0	-134	0			401650000.000	0.000						2012/11/01 07:46:25	1	01	124	157	50	215	170	147
5297	122197	MA							1	0	-135	0			401650000.000	0.000						2012/11/02 06:21:15	1	01	125	217	36	103	54	225
5297	122197	NK							1	0	-126	0			401650000.000	0.000						2012/11/03 02:27:41	1	01	128	215	53	84	118	221
5297	122197	NM	2012/11/05 15:13:37	2	20.903	37.190	27.510	68.832	4	0	-125	259	0	50	401677548.560	0.000	472	1148	194	158	999	2012/11/05 15:14:30	1	01	118	215	52	79	110	221
5297	122197	NL	2012/11/05 18:11:28	B	20.903	37.190	20.903	37.190	1	0	-123	0	3	8	401677548.740	0.000	985	1058	915	134	2752	2012/11/05 18:11:28	1	05	118	217
5297	122197	NL	2012/11/06 05:00:52	1	20.910	37.206	20.910	37.206	4	0	-128	169	3	58	401677541.100	0.000	912	3519	236	17	2057	2012/11/06 05:01:22	1	02	115	216	49	78	110	228
5297	122197	NL	2012/11/06 16:16:02	A	20.930	37.189	20.930	37.189	3	0	-133	179	3	8	401677540.970	0.000	869	3075	245	171	2422	2012/11/06 16:16:03	1	02	120	215	52	81	110	221
5297	122197	NM	2012/11/06 16:23:56	B	20.929	37.189	20.929	37.189	2	0	-129	115	3	0	401677546.310	0.000	654	1336	320	176	1710	2012/11/06 16:22:59	1	02	120	215	59	80	110	220
5297	122197	MA	2012/11/06 19:23:22	3	20.921	37.191	20.921	37.191	5	0	-120	370	3	58	401677547.230	0.000	249	293	210	160	237	2012/11/06 19:25:12	1	02	116	214	58	57	110	220
5297	122197	NL	2012/11/06 19:38:51	B	20.921	37.191	20.921	37.191	1	0	-134	0	3	0	401677545.960	0.000	555	585	525	95	797	2012/11/06 19:38:51	1	02	118	215	49	76	110	219
5297	122197	NL	2012/11/07 04:50:49	B	20.921	37.193	20.921	37.193	1	0	-131	0	3	8	401677540.830	0.000	2564	2946	2231	104	4432	2012/11/07 04:50:49	1	02	119	216	55	81	110	222
5297	122197	NM	2012/11/07 05:00:57	1	20.931	37.192	20.931	37.192	4	0	-126	207	3	60	401677546.740	0.000	1095	6519	183	81	3080	2012/11/07 05:01:37	1	02	118	216	50	72	110	221
5297	122197	NM	2012/11/07 16:03:23	1	20.913	37.191	20.913	37.191	4	0	-122	328	3	48	401677546.490	0.000	1355	8723	210	64	582	2012/11/07 16:03:42	1	02	117	216	49	76	110	217
5297	122197	NL	2012/11/07 16:03:42	B	20.913	37.191	20.913	37.191	1	0	-136	0	3	0	401677546.520	0.000	980	4899	196	64	592	2012/11/07 16:03:42	1	02	117	218	49	76	110	153
5297	122197	MA	2012/11/07 17:18:52	2	20.912	37.181	20.912	37.181	4	0	-123	377	3	58	401677544.530	0.000	318	655	154	179	685	2012/11/07 17:23:41	1	03	118	216	49	78	110	220
5297	122197	MA	2012/11/07 19:00:31	3	20.911	37.191	20.911	37.191	12	2	-117	552	3	58	401677548.000	0.000	228	714	72	86	186	2012/11/07 19:03:28	1	03	119	215	54	66	110	217
5297	122197	NL	2012/11/07 19:27:44	1	20.913	37.176	20.913	37.176	5	0	-129	369	3	50	401677546.400	0.000	714	1168	436	152	570	2012/11/07 19:26:17	1	03	117	214	59	56	110	218
5297	122197	NM							1	0	-134	0			401650000.000	0.000						2012/11/10 05:30:36	1	03	16	211	199	184	177	32
5297	122197	NL	2012/11/10 05:52:13	A	20.970	37.290	20.970	37.290	3	0	-124	255	3	0	401677541.600	0.000	421	1481	119	125	505	2012/11/10 05:53:01	1	03	116	216	48	77	110	226
5297	122197	NL	2012/11/10 07:31:21	3	20.979	37.284	20.979	37.284	7	0	-123	380	3	58	401677542.550	0.000	206	362	116	19	404	2012/11/10 07:35:00	1	03	119	215	54	61	114	239
5297	122197	MA	2012/11/10 08:27:23	1	20.981	37.280	20.981	37.280	5	0	-121	361	3	58	401677539.540	0.000	503	1301	194	16	811	2012/11/10 08:30:56	1	03	124	215	52	65	118	226
5297	122197	NL	2012/11/10 18:43:55	A	20.938	37.254	20.938	37.254	3	0	-127	134	3	8	401677554.120	0.000	2158	10829	429	60	3357	2012/11/10 18:43:58	1	04	118	215	49	79	110	219
5297	122197	MA	2012/11/10 19:40:59	1	20.895	37.182	20.895	37.182	5	0	-121	400	3	58	401677545.320	0.000	652	1878	226	109	462	2012/11/10 19:37:54	1	04	117	215	49	78	110	220
5297	122197	NP	2012/11/11 09:23:58	2	20.691	37.191	20.691	37.191	8	0	-129	437	3	50	401677541.230	0.000	391	836	182	16	506	2012/11/11 09:26:50	1	04	119	215	49	73	114	241
5297	122197	NP	2012/11/11 11:06:13	3	20.680	37.199	20.680	37.199	11	0	-121	567	3	58	401677543.330	0.000	214	640	71	75	218	2012/11/11 11:08:21	1	04	118	214	58	55	114	239
5297	122197	NN	2012/11/11 11:43:22	1	20.674	37.189	20.674	37.189	7	0	-125	641	3	48	401677542.790	0.000	955	1916	475	110	383	2012/11/11 11:47:09	1	05	117	214	63	51	114	243
5297	122197	NN	2012/11/11 13:29:58	1	20.677	37.192	20.677	37.192	5	0	-128	335	3	58	401677543.910	0.000	1379	5701	333	114	842	2012/11/11 13:29:36	1	05	121	215	53	62	118	228
5297	122197	NK	2012/11/11 13:38:42	B	20.651	37.185	20.651	37.185	2	0	-130	84	3	0	401677547.530	0.000	2029	2218	1855	88	1724	2012/11/11 13:37:18	1	05	121	215	56	59	118	228
5297	122197	NM	2012/11/12 04:39:26	B	20.696	37.184	20.696	37.184	2	0	-125	386	3	0	401677546.910	0.000	4212	107770	164	88	4278	2012/11/12 04:36:14	1	05	129	215	53	81	118	221
5297	122197	NL	2012/11/12 05:26:25	2	20.683	37.190	20.683	37.190	5	0	-125	581	3	58	401677545.410	0.000	267	438	162	71	321	2012/11/12 05:28:13	1	05	116	215	53	67	110	229
5297	122197	MA	2012/11/12 06:08:08	1	20.678	37.190	20.678	37.190	5	0	-122	285	3	58	401677543.750	0.000	533	2383	119	80	906	2012/11/12 06:12:09	1	05	116	214	58	57	110	225
5297	122197	NM	2012/11/12 06:19:59	B	20.679	37.191	20.679	37.191	1	0	-134	0	3	0	401677544.110	0.000	584	1298	262	77	1223	2012/11/12 06:19:59	1	05	115	214	61	55	110	224
5297	122197	NL	2012/11/12 07:15:29	B	20.674	37.181	20.674	37.181	1	0	-134	0	3	8	401677544.880	0.000	889	1230	641	78	1885	2012/11/12 07:15:30	1	05	117	216	53	68	110	224
5297	122197	NP	2012/11/12 09:12:39	A	20.665	37.183	20.665	37.183	3	0	-134	135	3	8	401677554.630	0.000	1077	3048	380	34	2254	2012/11/12 09:12:55	1	05	121	214	60	57	118	229
5297	122197	NP	2012/11/12 10:47:50	0	20.686	37.187	20.686	37.187	6	0	-121	333	3	58	401677545.570	0.000	1633	24199	110	74	1941	2012/11/12 10:52:39	1	06	121	214	59	62	114	234
5297	122197	NN	2012/11/12 11:36:16	2	20.691	37.182	20.691	37.182	6	0	-122	424	3	58	401677544.790	0.000	263	657	105	36	317	2012/11/12 11:39:05	1	06	121	215	58	58	114	232
5297	122197	NL	2012/11/13 05:17:18	3	20.704	37.194	20.704	37.194	5	0	-128	461	3	60	401677546.480	0.000	194	252	148	18	443	2012/11/13 05:20:25	1	06	118	215	50	74	110	222
5297	122197	MA	2012/11/13 05:43:50	1	20.699	37.183	20.699	37.183	7	0	-125	373	3	50	401677545.960	0.000	540	999	291	156	537	2012/11/13 05:47:37	1	06	116	215	49	75	110	229
5297	122197	NM	2012/11/13 05:55:32	A	20.700	37.192	20.700	37.192	3	0	-128	234	3	0	401677546.930	0.000	665	1505	293	150	667	2012/11/13 05:55:59	1	06	120	215	52	83	110	228
5297	122197	NL	2012/11/13 06:57:58	2	20.687	37.196	20.687	37.196	11	0	-120	542	3	58	401677545.180	0.000	264	312	223	137	204	2012/11/13 07:02:56	1	06	123	215	51	68	118	229
5297	122197	MA	2012/11/13 07:23:44	3	20.683	37.198	20.683	37.198	9	4	-115	606	3	50	401677545.160	0.000	213	1283	35	97	499	2012/11/13 07:33:06	1	06	123	215	51	81	114	233
5297	122197	NP	2012/11/13 09:03:43	B	20.677	37.196	20.677	37.196	1	0	-133	0	3	8	401677543.060	0.000	4394	4818	4006	89	1938	2012/11/13 09:03:44	1	07	122	215	53	71	114	235
5297	122197	NM	2012/11/14 03:51:21	3	20.692	37.195	20.692	37.195	11	0	-124	618	3	50	401677546.800	0.000	163	205	129	59	179	2012/11/14 03:55:19	1	07	120	213	60	75	114	215
5297	122197	NL	2012/11/14 05:08:38	B	20.690	37.195	20.690	37.195	1	0	-133	0	3	8	401677544.810	0.000	1067	1141	997	92	1705	2012/11/14 05:08:39	1	07	117	215	54	63	110	219
5297	122197	NL	2012/11/14 06:43:27	2	20.687	37.194	20.687	37.194	7	0	-122	429	3	58	401677546.480	0.000	253	773	82	113	237	2012/11/14 06:49:24	1	07	115	214	57	61	110	225
5297	122197	MA	2012/11/14 07:03:15	3	20.687	37.188	20.687	37.188	10	3	-117	575	3	50	401677544.880	0.000	197	859	45	101	261	2012/11/14 07:10:54	1	07	117	215	52	68	110	225
5297	122197	MA	2012/11/14 08:47:27	A	20.688	37.201	20.688	37.201	3	0	-126	172	3	8	401677545.260	0.000	794	1911	330	143	1429	2012/11/14 08:48:10	1	08	116	215	51	75	110	230
5297	122197	NL	2012/11/15 04:55:55	2	20.693	37.192	20.693	37.192	4	0	-130	375	3	60	401677546.930	0.000	344	865	137	24	918	2012/11/15 04:55:56	1	08	119	214	54	68	110	217
5297	122197	NM	2012/11/15 05:09:59	B	20.689	37.191	20.689	37.191	2	0	-124	83	3	0	401677546.460	0.000	321	502	204	68	846	2012/11/15 05:09:18	1	08	123	215	56	84	114	217
5297	122197	NL	2012/11/15 06:35:33	1	20.693	37.192	20.693	37.192	7	0	-122	618	3	58	401677546.470	0.000	660	4425	98	102	475	2012/11/15 06:38:47	1	08	116	215	51	73	110	224
5297	122197	MA	2012/11/15 06:41:26	2	20.691	37.190	20.691	37.190	7	3	-116	645	3	58	401677545.240	0.000	251	525	119	89	199	2012/11/15 06:50:48	1	08	119	215	52	79	110	225
5297	122197	MA	2012/11/15 08:22:37	1	20.683	37.196	20.683	37.196	5	0	-120	422	3	58	401677545.200	0.000	572	1749	187	3	620	2012/11/15 08:28:48	1	08	114	213	62	56	110	225
5297	122197	NM	2012/11/16 04:47:14	B	20.654	37.230	20.654	37.230	1	0	-124	0	3	0	401677545.770	0.000	4986	5334	4661	91	6776	2012/11/16 04:47:14	1	09	120	213	53	69	114	217
5297	122197	NM	2012/11/16 06:22:30	A	20.667	37.196	20.667	37.196	3	0	-132	149	3	0	401677545.260	0.000	257	275	240	63	308	2012/11/16 06:24:16	1	09	117	213	61	57	110	217
5297	122197	NL	2012/11/16 06:22:51	1	20.667	37.195	20.667	37.195	7	0	-125	437	3	50	401677546.680	0.000	1068	22443	50	101	1202	2012/11/16 06:27:17	1	09	117	213	59	59	110	219
5297	122197	MA	2012/11/16 06:20:44	3	20.668	37.196	20.668	37.196	10	2	-117	625	3	58	401677546.570	0.000	158	194	128	45	194	2012/11/16 06:29:34	1	09	116	214	53	64	110	225
5297	122197	NK	2012/11/16 15:00:22	2	20.763	37.219	20.763	37.219	9	0	-124	591	3	58	401677545.960	0.000	374	515	270	122	220	2012/11/16 15:03:22	1	09	118	213	58	57	114	212
5297	122197	NN	2012/11/18 12:10:44	1	20.911	37.164	20.911	37.164	8	0	-121	501	3	50	401677544.900	0.000	617	6000	63	75	653	2012/11/18 12:13:03	1	10	117	213	55	68	110	225
5297	122197	NK	2012/11/18 12:32:06	A	20.910	37.175	20.910	37.175	3	0	-130	204	3	0	401677547.000	0.000	666	1154	383	32	799	2012/11/18 12:32:39	1	10	118	214	53	80	110	223
5297	122197	NN	2012/11/18 13:55:03	B	20.913	37.180	20.913	37.180	2	0	-132	172	3	8	401677549.960	0.000	1148	2699	488	28	1536	2012/11/18 13:53:38	1	10	120	214	53	69	114	211
5297	122197	NK	2012/11/18 14:09:02	2	20.914	37.182	20.914	37.182	8	0	-124	330	3	50	401677547.720	0.000	434	4057	46	72	724	2012/11/18 14:11:04	1	10	121	213	53	67	114	212
5297	122197	NM	2012/11/18 15:03:33	B	20.914	37.193	20.914	37.193	2	0	-130	371	3	8	401677549.010	0.000	575	2559	129	32	1147	2012/11/18 15:00:28	1	10	121	214	52	70	114	211
5297	122197	NM	2012/11/19 05:16:09	B	20.933	37.259	20.933	37.259	1	0	-127	0	3	0	401677554.340	0.000	2576	2851	2327	66	5663	2012/11/19 05:16:09	1	11	117	213	62	55	114	211
5297	122197	MA	2012/11/19 05:23:49	B	20.915	37.252	20.915	37.252	1	0	-134	0	3	0	401677575.200	0.000	2485	2912	2119	96	5460	2012/11/19 05:23:50	1	11	104	214	53	69	114	212
5297	122197	NL	2012/11/19 05:44:50	3	20.850	37.182	20.850	37.182	5	0	-122	434	3	60	401677547.310	0.000	152	214	107	69	280	2012/11/19 05:48:50	1	11	117	214	51	73	114	217
5297	122197	MA	2012/11/19 07:00:15	2	20.848	37.181	20.848	37.181	8	2	-116	527	3	58	401677547.970	0.000	301	1245	72	91	275	2012/11/19 07:08:15	1	11	123	214	51	81	114	216
5297	122197	NL	2012/11/19 07:23:36	B	20.848	37.184	20.848	37.184	2	0	-125	303	3	0	401677548.730	0.000	614	1644	229	165	707	2012/11/19 07:23:37	1	11	115	215	49	71	110	219
5297	122197	MA	2012/11/19 08:43:38	B	20.849	37.188	20.849	37.188	1	0	-126	0	3	8	401677545.680	0.000	1484	1572	1400	143	1857	2012/11/19 08:43:39	1	11	117	214	51	73	110	221
5297	122197	NN	2012/11/19 13:42:33	A	20.859	37.154	20.859	37.154	3	0	-129	101	3	8	401677559.780	0.000	1882	4866	728	174	2443	2012/11/19 13:42:29	1	11	120	213	56	65	114	212
5297	122197	NK	2012/11/19 13:45:44	1	20.887	37.166	20.887	37.166	8	0	-122	545	3	40	401677548.970	0.000	670	2489	180	82	257	2012/11/19 13:47:57	1	11	119	214	50	71	110	222
5297	122197	NM	2012/11/20 04:48:56	1	20.889	37.188	20.889	37.188	6	0	-125	581	3	50	401677548.140	0.000	658	3366	128	90	941	2012/11/20 04:51:22	1	11	120	213	54	66	114	212
5297	122197	NL	2012/11/20 05:34:42	3	20.896	37.171	20.896	37.171	6	0	-125	503	3	50	401677547.820	0.000	199	284	139	172	345	2012/11/20 05:36:37	1	11	122	213	56	82	114	213
5297	122197	MA	2012/11/20 06:42:45	1	20.900	37.169	20.900	37.169	4	1	-116	337	3	58	401677547.120	0.000	518	1800	148	88	402	2012/11/20 06:45:19	1	11	122	214	53	73	114	213
5297	122197	NL	2012/11/20 07:13:38	3	20.896	37.179	20.896	37.179	5	0	-126	417	3	58	401677545.240	0.000	202	429	95	124	334	2012/11/20 07:15:00	1	12	119	213	53	68	110	221
5297	122197	MA	2012/11/20 08:23:07	A	20.888	37.183	20.888	37.183	3	0	-124	237	3	8	401677543.390	0.000	384	1368	107	121	1030	2012/11/20 08:23:40	1	12	116	213	59	58	110	253
5297	122197	NP	2012/11/20 09:28:10	1	20.887	37.186	20.887	37.186	7	0	-128	382	3	58	401677548.680	0.000	621	1210	318	18	537	2012/11/20 09:30:28	1	12	118	215	50	73	110	217
5297	122197	NN	2012/11/20 11:54:38	B	20.882	37.196	20.882	37.196	1	0	-124	0	3	8	401677551.490	0.000	2428	2531	2328	72	2393	2012/11/20 11:54:39	1	12	120	214	55	67	114	211
5297	122197	NM	2012/11/21 06:03:40	B	20.831	37.267	20.831	37.267	1	0	-126	0	3	0	401677559.700	0.000	5806	8338	4042	104	6277	2012/11/21 06:03:40	1	12	120	213	51	74	114	212
5297	122197	MA	2012/11/21 06:20:40	2	20.841	37.185	20.841	37.185	6	1	-119	472	3	50	401677548.110	0.000	265	309	226	19	263	2012/11/21 06:23:00	1	12	118	213	56	64	114	217
5297	122197	NL	2012/11/21 07:01:59	1	20.834	37.193	20.834	37.193	6	0	-127	449	3	58	401677545.360	0.000	510	1683	154	119	329	2012/11/21 07:06:18	1	12	118	212	60	70	114	216
5297	122197	MA	2012/11/21 07:58:50	2	20.841	37.190	20.841	37.190	7	0	-120	558	3	58	401677546.620	0.000	324	415	252	151	215	2012/11/21 08:04:13	1	12	121	214	51	80	114	217
5297	122197	NP	2012/11/21 09:16:05	A	20.841	37.187	20.841	37.187	3	0	-131	314	3	8	401677545.980	0.000	1006	2308	438	170	940	2012/11/21 09:19:41	1	12	127	214	49	78	118	220
5297	122197	NP	2012/11/21 10:53:20	B	20.841	37.187	20.841	37.187	2	0	-128	76	3	8	401677547.500	0.000	726	765	689	34	2021	2012/11/21 10:52:43	1	13	122	213	59	86	124	179
5297	122197	NK	2012/11/21 13:00:19	2	20.825	37.172	20.825	37.172	4	0	-128	355	3	58	401677552.830	0.000	455	1441	143	47	658	2012/11/21 12:57:42	1	13	120	214	49	77	114	213
5297	122197	NN	2012/11/21 13:15:13	B	20.825	37.172	20.825	37.172	1	0	-134	0	3	0	401677548.220	0.000	482	702	330	50	994	2012/11/21 13:15:14	1	13	119	214	49	77	114	212
5297	122197	NM	2012/11/22 04:04:30	B	20.787	37.156	20.787	37.156	1	0	-127	0	3	0	401677543.740	0.000	2120	2328	1929	123	5582	2012/11/22 04:04:31	1	13	119	211	57	60	114	209
5297	122197	MA	2012/11/22 07:40:44	2	20.697	37.196	20.697	37.196	5	2	-118	288	3	58	401677546.830	0.000	458	2145	97	109	466	2012/11/22 07:43:28	1	13	120	213	50	79	110	219
5297	122197	NM	2012/11/22 15:12:38	B	20.628	37.200	20.628	37.200	1	0	-130	0	3	8	401677576.360	0.000	3040	3500	2641	64	3921	2012/11/22 15:12:38	1	13	119	212	53	62	114	211
5297	122197	NL	2012/11/24 04:43:59	A	20.803	37.183	20.803	37.183	3	0	-131	257	3	0	401677540.990	0.000	1010	4136	246	12	2208	2012/11/24 04:43:29	1	13	124	212	51	80	114	206
5297	122197	NM	2012/11/24 04:57:15	A	20.824	37.188	20.824	37.188	3	0	-129	289	3	0	401677548.520	0.000	329	2211	48	95	712	2012/11/24 04:58:16	1	13	121	213	52	68	114	207
5297	122197	MA	2012/11/24 07:01:42	B	20.811	37.190	20.811	37.190	1	0	-120	0	3	8	401677543.740	0.000	1345	1589	1137	98	2247	2012/11/24 07:01:42	1	13	124	213	53	83	114	213
5297	122197	NN	2012/11/24 11:04:18	3	20.815	37.184	20.815	37.184	6	0	-127	364	3	58	401677549.350	0.000	246	561	107	36	553	2012/11/24 11:06:11	1	13	116	211	61	54	114	214
5297	122197	NP	2012/11/24 12:08:36	1	20.830	37.177	20.830	37.177	4	0	-130	352	3	58	401677542.460	0.000	822	1961	344	133	654	2012/11/24 12:08:49	1	14	121	213	53	69	114	214
5297	122197	NN	2012/11/24 12:49:16	3	20.824	37.189	20.824	37.189	5	0	-122	573	3	58	401677546.470	0.000	234	619	88	90	275	2012/11/24 12:49:19	1	14	119	212	57	61	114	213
5297	122197	NK	2012/11/24 13:26:40	2	20.816	37.183	20.816	37.183	5	0	-124	417	3	58	401677550.200	0.000	320	840	121	51	284	2012/11/24 13:27:13	1	14	124	213	53	81	114	209
5297	122197	NK	2012/11/24 15:06:52	B	20.808	37.184	20.808	37.184	1	0	-130	0	3	8	401677556.950	0.000	1605	1793	1436	84	1923	2012/11/24 15:06:52	1	14	124	214	49	80	114	206
5297	122197	NM	2012/11/25 04:31:46	B	20.853	37.198	20.853	37.198	2	0	-125	47	3	0	401677550.160	0.000	2684	26347	273	107	4143	2012/11/25 04:31:23	1	14	126	213	50	80	114	205
5297	122197	NM	2012/11/25 06:08:13	A	20.822	37.190	20.822	37.190	3	0	-130	183	3	0	401677543.320	0.000	743	2758	199	0	2073	2012/11/25 06:09:57	1	14	121	212	53	74	114	215
5297	122197	NL	2012/11/25 06:13:56	A	20.838	37.187	20.838	37.187	3	0	-125	263	3	0	401677550.670	0.000	231	586	91	54	560	2012/11/25 06:14:56	1	14	120	212	55	63	114	213
5297	122197	MA	2012/11/25 08:16:11	2	20.829	37.194	20.829	37.194	5	0	-120	385	3	58	401677545.190	0.000	403	1441	112	171	658	2012/11/25 08:21:53	1	14	120	212	53	67	114	212
5297	122197	NN	2012/11/25 10:55:15	A	20.814	37.182	20.814	37.182	3	0	-131	166	3	8	401677554.920	0.000	719	2207	234	146	1607	2012/11/25 10:55:38	1	15	122	213	50	80	114	211
5297	122197	NP	2012/11/25 11:55:57	2	20.838	37.189	20.838	37.189	6	0	-127	418	3	58	401677547.820	0.000	426	1088	166	122	434	2012/11/25 11:58:10	1	15	121	213	49	75	114	216
5297	122197	NN	2012/11/25 12:34:30	3	20.841	37.189	20.841	37.189	8	0	-121	539	3	58	401677546.520	0.000	219	474	101	88	186	2012/11/25 12:37:53	1	15	123	213	51	74	114	209
5297	122197	NM	2012/11/26 05:43:10	B	20.886	37.211	20.886	37.211	1	0	-125	0	3	0	401677564.690	0.000	4807	5981	3862	125	5659	2012/11/26 05:43:11	1	15	120	83	40	62	114	207
5297	122197	NL	2012/11/26 05:58:05	B	20.893	37.231	20.893	37.231	1	0	-122	0	3	0	401677555.930	0.000	4884	6205	3843	73	5750	2012/11/26 05:58:06	1	15	122	213	49	77	114	209
5297	122197	MA	2012/11/26 06:20:02	A	20.851	37.203	20.851	37.203	3	1	-118	271	3	0	401677550.110	0.000	356	1576	80	81	950	2012/11/26 06:19:28	1	15	120	212	52	67	114	210
5297	122197	MA	2012/11/26 07:57:03	B	20.848	37.194	20.848	37.194	2	1	-117	345	3	8	401677547.080	0.000	525	4664	59	131	1446	2012/11/26 07:57:03	1	15	121	212	52	83	114	211
5297	122197	NP	2012/11/26 09:59:30	0	20.849	37.183	20.849	37.183	4	0	-126	363	3	48	401677549.550	0.000	1602	6647	386	66	605	2012/11/26 10:04:05	1	15	121	212	51	71	114	208
5297	122197	NN	2012/11/26 10:43:51	B	20.849	37.181	20.849	37.181	1	0	-134	0	3	8	401677547.860	0.000	2656	3302	2135	72	1420	2012/11/26 10:43:52	1	15	122	213	50	76	114	208
5297	122197	NP	2012/11/26 11:47:09	3	20.856	37.188	20.856	37.188	5	0	-126	326	3	58	401677545.570	0.000	185	250	137	175	370	2012/11/26 11:48:12	1	15	120	211	55	63	114	209
5297	122197	NN	2012/11/26 12:23:41	A	20.852	37.189	20.852	37.189	3	0	-122	316	3	8	401677548.280	0.000	217	900	52	82	485	2012/11/26 12:23:57	1	16	126	213	51	81	114	205
5297	122197	NK	2012/11/26 12:36:39	B	20.852	37.188	20.852	37.188	2	0	-134	313	3	0	401677547.460	0.000	257	476	138	32	618	2012/11/26 12:34:03	1	16	122	212	53	69	114	205
5297	122197	NK	2012/11/26 14:14:05	0	20.852	37.195	20.852	37.195	6	0	-122	273	3	58	401677549.520	0.000	2013	16427	246	64	1177	2012/11/26 14:15:25	1	16	125	212	51	81	114	204
5297	122197	NM	2012/11/27 05:24:04	2	20.855	37.194	20.855	37.194	7	0	-122	454	3	50	401677549.540	0.000	268	675	106	123	253	2012/11/27 05:26:41	1	16	121	212	51	71	114	205
5297	122197	NL	2012/11/27 05:46:57	3	20.852	37.194	20.852	37.194	5	0	-123	523	3	50	401677547.350	0.000	202	411	99	75	249	2012/11/27 05:51:52	1	16	122	211	58	68	114	205
5297	122197	MA	2012/11/27 05:56:02	B	20.857	37.186	20.857	37.186	2	0	-123	87	3	0	401677548.700	0.000	581	1433	235	129	1611	2012/11/27 05:55:19	1	16	123	212	53	70	114	201
5297	122197	NL	2012/11/27 07:27:59	2	20.847	37.197	20.847	37.197	6	0	-126	389	3	58	401677544.820	0.000	372	823	168	134	439	2012/11/27 07:33:35	1	16	121	212	52	69	114	199
5297	122197	MA	2012/11/27 07:33:35	3	20.855	37.195	20.855	37.195	5	3	-118	429	3	50	401677549.150	0.000	191	479	75	115	231	2012/11/27 07:40:00	1	16	121	213	49	78	114	213
5297	122197	NP	2012/11/27 09:51:57	A	20.853	37.202	20.853	37.202	3	0	-126	90	3	8	401677545.240	0.000	797	2203	288	74	1707	2012/11/27 09:51:57	1	17	124	212	51	81	114	210
5297	122197	NP	2012/11/27 11:36:13	3	20.850	37.190	20.850	37.190	6	0	-125	489	3	58	401677547.640	0.000	218	415	114	119	260	2012/11/27 11:37:01	1	17	120	211	54	65	114	209
5297	122197	NP	2012/11/28 09:41:03	2	20.815	37.182	20.815	37.182	4	0	-129	346	3	50	401677554.920	0.000	283	782	102	26	717	2012/11/28 09:42:09	1	17	125	211	51	83	114	209
5297	122197	NP							1	0	-140	0			401650000.000	0.000						2012/11/29 11:06:57	1	17	121	211	55	63	114	208
5297	122197	NK							1	0	-138	0			401650000.000	0.000						2012/11/29 12:59:07	1	17	126	212	48	81	114	204
5297	122197	NK							1	0	-127	0			401650000.000	0.000						2012/11/29 14:41:31	1	17	122	210	57	64	118	200
5297	122197	NP	2012/11/30 11:01:44	B	20.806	37.189	20.806	37.189	2	0	-125	45	3	0	401677550.900	0.000	2460	48841	123	77	6950	2012/11/30 11:01:22	1	17	124	211	51	74	114	207
5297	122197	NN	2012/11/30 13:23:47	2	20.803	37.171	20.803	37.171	4	0	-128	541	3	58	401677550.340	0.000	411	533	316	111	341	2012/11/30 13:23:22	1	17	121	212	49	77	114	208
5297	122197	NK	2012/11/30 14:18:20	A	20.807	37.179	20.807	37.179	3	0	-122	438	3	8	401677550.270	0.000	221	557	87	119	484	2012/11/30 14:17:36	1	18	123	211	53	66	118	200
5297	122197	NM	2012/12/01 03:48:16	B	20.875	37.174	20.875	37.174	2	0	-125	165	3	0	401677551.290	0.000	1143	12180	107	43	3217	2012/12/01 03:46:54	1	18	122	210	53	82	110	196
5297	122197	NM	2012/12/01 05:30:09	B	20.852	37.225	20.852	37.225	1	0	-128	0	3	0	401677533.740	0.000	1932	2390	1561	76	5455	2012/12/01 05:30:10	1	18	119	211	55	83	110	200
5297	122197	MA	2012/12/01 06:16:23	B	20.838	37.194	20.838	37.194	1	0	-128	0	3	8	401677538.260	0.000	2360	3758	1481	57	6668	2012/12/01 06:16:24	1	18	118	212	52	82	110	201
5297	122197	NP	2012/12/01 09:11:21	A	20.839	37.149	20.839	37.149	3	0	-133	174	3	8	401677559.280	0.000	2164	7521	622	10	2489	2012/12/01 09:11:20	1	18	120	210	58	57	114	204
5297	122197	NP	2012/12/01 10:51:05	0	20.873	37.156	20.873	37.156	5	0	-123	388	3	58	401677546.360	0.000	1556	25500	94	77	1483	2012/12/01 10:52:10	1	18	123	212	48	77	114	211
5297	122197	NN	2012/12/01 11:26:59	B	20.878	37.152	20.878	37.152	2	0	-127	47	3	8	401677547.320	0.000	1417	3929	510	79	1855	2012/12/01 11:26:36	1	19	121	211	54	67	114	212
5297	122197	NL	2012/12/02 04:49:17	B	20.867	37.170	20.867	37.170	2	0	-133	178	3	0	401677547.110	0.000	1579	9464	263	39	4042	2012/12/02 04:47:49	1	19	125	211	49	78	118	197
5297	122197	MA	2012/12/02 05:53:04	B	20.876	37.153	20.876	37.153	1	0	-125	0	3	0	401677548.270	0.000	4133	5948	2872	91	6073	2012/12/02 05:53:05	1	19	123	210	54	64	118	197
5297	122197	NL	2012/12/02 06:31:13	A	20.875	37.172	20.875	37.172	3	0	-122	193	3	0	401677549.180	0.000	3659	150320	89	102	4611	2012/12/02 06:31:15	1	19	125	211	50	75	114	205
5297	122197	MA	2012/12/02 07:35:12	A	20.872	37.175	20.872	37.175	3	2	-116	350	3	8	401677549.980	0.000	230	661	80	109	313	2012/12/02 07:34:21	1	19	115	210	55	77	110	203
5297	122197	NP	2012/12/02 10:34:59	1	20.860	37.164	20.860	37.164	5	0	-121	608	3	58	401677549.780	0.000	903	1660	491	58	439	2012/12/02 10:44:01	1	19	118	211	51	79	110	203
5297	122197	NN	2012/12/02 11:21:00	2	20.872	37.169	20.872	37.169	7	0	-125	360	3	58	401677546.800	0.000	417	624	278	10	334	2012/12/02 11:20:39	1	19	109	207	71	53	106	214
5297	122197	NL	2012/12/03 06:16:17	2	20.839	37.179	20.839	37.179	7	0	-124	484	3	50	401677549.750	0.000	272	986	75	92	316	2012/12/03 06:21:27	1	20	124	210	49	77	118	204
5297	122197	NM	2012/12/03 06:21:27	B	20.839	37.179	20.839	37.179	1	0	-138	0	3	0	401677549.660	0.000	395	571	273	92	544	2012/12/03 06:21:27	1	20	124	210	49	77	118	204
5297	122197	MA	2012/12/03 07:12:31	0	20.833	37.186	20.833	37.186	7	1	-118	416	3	58	401677550.050	0.000	1563	24798	98	101	919	2012/12/03 07:17:08	1	20	128	211	49	81	118	202
5297	122197	MA	2012/12/03 08:53:10	B	20.833	37.184	20.833	37.184	2	0	-127	53	3	8	401677549.630	0.000	2610	2756	2470	126	1880	2012/12/03 08:52:44	1	20	125	211	49	78	118	202
5297	122197	NP	2012/12/03 10:28:26	B	20.834	37.187	20.834	37.187	2	0	-122	117	3	8	401677548.260	0.000	744	5519	100	88	2073	2012/12/03 10:27:28	1	20	123	211	53	68	118	203
5297	122197	NN	2012/12/03 11:08:01	2	20.831	37.183	20.831	37.183	4	0	-129	294	3	58	401677550.300	0.000	318	652	155	4	614	2012/12/03 11:09:02	1	20	121	209	60	57	118	201
5297	122197	NP	2012/12/03 12:13:36	2	20.834	37.180	20.834	37.180	4	0	-129	406	3	58	401677548.380	0.000	324	730	144	142	637	2012/12/03 12:13:45	1	20	127	211	52	81	118	202
5297	122197	NK	2012/12/03 13:08:06	2	20.830	37.181	20.830	37.181	5	0	-124	407	3	58	401677551.520	0.000	268	818	87	46	459	2012/12/03 13:07:35	1	20	123	210	53	64	118	199
5297	122197	NM	2012/12/04 04:18:23	3	20.833	37.180	20.833	37.180	6	0	-124	512	3	50	401677550.790	0.000	141	261	75	70	232	2012/12/04 04:21:14	1	21	118	210	48	77	110	194
5297	122197	NM	2012/12/04 06:00:20	B	20.836	37.181	20.836	37.181	2	0	-134	44	3	8	401677549.320	0.000	656	822	523	96	1826	2012/12/04 05:59:58	1	21	118	211	49	76	110	198
5297	122197	NL	2012/12/04 06:00:42	3	20.839	37.186	20.839	37.186	6	0	-124	567	3	50	401677550.840	0.000	222	491	100	102	204	2012/12/04 06:07:22	1	21	121	210	50	83	110	200
5297	122197	MA	2012/12/04 06:48:04	3	20.836	37.180	20.836	37.180	8	3	-116	643	3	58	401677549.430	0.000	196	354	108	98	165	2012/12/04 06:57:33	1	21	119	211	48	81	110	202
5297	122197	NL	2012/12/04 07:47:36	B	20.834	37.179	20.834	37.179	1	0	-134	0	3	8	401677549.790	0.000	1305	1417	1201	89	1496	2012/12/04 07:47:37	1	07	28	113	199	28	113	199
5297	122197	NL	2012/12/04 19:01:03	2	20.869	37.178	20.869	37.178	6	0	-128	447	3	58	401677549.880	0.000	288	786	105	117	407	2012/12/04 19:01:29	1	21	122	209	52	82	124	205
5297	122197	MA	2012/12/04 19:43:50	2	20.869	37.176	20.869	37.176	7	0	-120	409	3	58	401677549.860	0.000	333	463	240	144	268	2012/12/04 19:45:40	1	21	118	210	50	72	110	196
5297	122197	NP	2012/12/05 11:51:38	B	20.868	37.163	20.868	37.163	2	0	-130	297	3	0	401677546.020	0.000	3434	56552	208	125	3831	2012/12/05 11:46:42	1	21	115	211	48	74	106	207
5297	122197	NN	2012/12/05 12:28:21	B	20.861	37.170	20.861	37.170	2	0	-123	160	3	8	401677547.560	0.000	409	4225	39	77	1093	2012/12/05 12:27:01	1	21	115	211	51	72	110	205
5297	122197	NK	2012/12/05 13:57:41	B	20.862	37.170	20.862	37.170	2	0	-124	100	3	8	401677547.670	0.000	615	8646	43	74	1695	2012/12/05 13:56:51	1	22	115	211	49	75	110	201
5297	122197	NM	2012/12/06 05:13:08	A	20.857	37.205	20.857	37.205	3	0	-124	314	3	0	401677546.860	0.000	823	11698	57	89	2305	2012/12/06 05:13:20	1	22	118	210	50	77	110	198
5297	122197	NL	2012/12/06 05:41:22	B	20.850	37.177	20.850	37.177	2	0	-127	85	3	0	401677546.340	0.000	1234	9855	154	61	3474	2012/12/06 05:40:40	1	22	117	209	51	69	110	198
5297	122197	MA	2012/12/06 06:11:34	A	20.855	37.177	20.855	37.177	3	0	-122	207	3	8	401677550.680	0.000	433	1740	107	55	1179	2012/12/06 06:12:32	1	22	121	209	54	83	110	199
5297	122197	NL	2012/12/06 07:22:09	B	20.855	37.176	20.855	37.176	2	0	-129	101	3	8	401677550.490	0.000	475	1332	169	116	1300	2012/12/06 07:22:10	1	22	115	210	52	70	110	205
5297	122197	MA	2012/12/06 07:50:00	3	20.856	37.177	20.856	37.177	5	2	-116	420	3	50	401677549.400	0.000	167	345	81	125	254	2012/12/06 07:55:19	1	22	120	210	52	82	110	204
5297	122197	NP	2012/12/06 09:55:26	B	20.858	37.177	20.858	37.177	1	0	-129	0	3	8	401677544.800	0.000	813	882	749	96	2168	2012/12/06 09:55:26	1	22	123	211	55	78	114	207
5297	122197	NK	2012/12/07 03:40:02	B	20.859	37.178	20.859	37.178	1	0	-126	0	3	0	401677543.770	0.000	2065	3011	1416	109	5834	2012/12/07 03:40:03	1	23	124	210	48	74	118	195
5297	122197	NL	2012/12/07 05:30:24	B	20.872	37.172	20.872	37.172	2	0	-128	154	3	8	401677547.310	0.000	1571	20229	122	79	4433	2012/12/07 05:29:08	1	23	124	210	51	76	118	197
5297	122197	NL	2012/12/07 07:08:33	B	20.877	37.174	20.877	37.174	1	0	-126	0	3	8	401677537.660	0.000	1682	6119	462	80	4745	2012/12/07 07:08:33	1	23	123	209	53	68	118	201
5297	122197	MA	2012/12/07 07:32:12	B	20.887	37.184	20.887	37.184	2	0	-121	285	3	0	401677547.420	0.000	1372	26329	71	86	3866	2012/12/07 07:32:12	1	23	121	208	57	59	118	201
5297	122197	NP	2012/12/07 09:43:09	B	20.892	37.184	20.892	37.184	1	0	-134	0	3	8	401677549.100	0.000	1566	4395	558	87	4416	2012/12/07 09:43:09	1	23	124	210	49	78	117	141
5297	122197	NP	2012/12/07 11:30:22	A	20.881	37.169	20.881	37.169	3	0	-128	436	3	8	401677548.210	0.000	204	373	111	166	442	2012/12/07 11:31:27	1	23	123	210	50	73	119	201
5297	122197	NK	2012/12/07 13:11:13	B	20.884	37.167	20.884	37.167	2	0	-124	152	3	8	401677545.060	0.000	515	2408	110	125	1404	2012/12/07 13:09:57	1	23	123	210	53	69	118	200
5297	122197	NN	2012/12/07 13:45:31	2	20.885	37.163	20.885	37.163	4	0	-130	266	3	58	401677547.620	0.000	452	1321	154	137	1095	2012/12/07 13:45:29	1	23	127	209	52	78	118	202
5297	122197	MA	2012/12/07 20:21:52	A	20.896	37.176	20.896	37.176	3	0	-126	166	3	8	401677550.880	0.000	956	3142	290	16	2257	2012/12/07 20:22:37	1	23	116	209	56	63	110	196
5297	122197	NM	2012/12/08 04:28:00	B	20.903	37.166	20.903	37.166	1	0	-134	0	3	8	401677547.830	0.000	3516	3934	3141	21	4768	2012/12/08 04:28:01	1	23	116	209	53	68	110	195
5297	122197	NL	2012/12/08 05:16:19	2	20.893	37.181	20.893	37.181	7	0	-126	478	3	58	401677549.430	0.000	351	461	267	18	335	2012/12/08 05:19:05	1	24	116	207	59	70	110	197
5297	122197	MA	2012/12/08 05:29:03	B	20.898	37.170	20.898	37.170	1	0	-131	0	3	8	401677552.000	0.000	2590	2823	2376	91	4966	2012/12/08 05:29:04	1	24	118	209	51	71	110	199
5297	122197	NM	2012/12/08 06:02:47	B	20.897	37.170	20.897	37.170	1	0	-130	0	3	8	401677550.700	0.000	4105	4493	3750	91	5084	2012/12/08 06:02:47	1	24	118	210	49	78	110	197
5297	122197	NL	2012/12/08 06:58:51	3	20.893	37.189	20.893	37.189	6	0	-121	516	3	58	401677549.210	0.000	149	347	63	115	231	2012/12/08 07:00:48	1	24	117	209	55	67	110	200
5297	122197	MA	2012/12/08 07:07:01	1	20.893	37.181	20.893	37.181	6	3	-116	531	3	58	401677549.190	0.000	703	6679	73	102	675	2012/12/08 07:13:08	1	24	113	208	58	59	106	211
5297	122197	NK	2012/12/08 12:43:29	A	20.885	37.172	20.885	37.172	3	0	-128	263	3	8	401677552.360	0.000	1302	7199	235	41	1725	2012/12/08 12:42:49	1	24	117	209	51	71	110	199
5297	122197	NN	2012/12/08 13:33:44	B	20.885	37.172	20.885	37.172	1	0	-134	0	3	8	401677551.510	0.000	1050	2015	547	42	2197	2012/12/08 13:33:44	1	24	125	210	51	71	118	199
5297	122197	NK	2012/12/08 14:23:14	2	20.895	37.187	20.895	37.187	5	0	-122	384	3	58	401677548.990	0.000	263	812	85	89	287	2012/12/08 14:24:28	1	24	116	209	55	63	110	199
5297	122197	NM	2012/12/09 04:00:07	B	20.902	37.207	20.902	37.207	1	0	-125	0	3	0	401677558.980	0.000	3205	4036	2545	121	5050	2012/12/09 04:00:08	1	24	116	207	22	65	104	242
5297	122197	NL	2012/12/09 06:44:23	B	20.902	37.193	20.902	37.193	2	0	-122	173	3	8	401677556.480	0.000	1964	29834	129	32	3990	2012/12/09 06:42:57	1	16	122	209	51	69	118	200
5297	122197	MA	2012/12/09 06:45:50	B	20.897	37.189	20.897	37.189	1	0	-122	0	3	0	401677548.370	0.000	1158	12017	111	32	3260	2012/12/09 06:45:50	1	56	123	209	50	71	118	201
5297	122197	NP	2012/12/09 11:00:29	A	20.931	37.175	20.931	37.175	3	0	-125	410	3	8	401677549.340	0.000	277	1998	38	77	693	2012/12/09 11:05:49	1	24	119	206	63	57	114	205
5297	122197	NL	2012/12/10 04:52:15	1	20.996	37.136	20.996	37.136	8	0	-130	358	3	50	401677548.860	0.000	1106	2814	434	19	794	2012/12/10 04:54:19	1	25	117	208	55	65	110	194
5297	122197	NM	2012/12/10 05:16:07	2	20.997	37.144	20.997	37.144	4	0	-122	427	3	50	401677549.020	0.000	436	2052	92	127	482	2012/12/10 05:18:32	1	25	117	210	50	76	110	197
5297	122197	MA	2012/12/10 06:25:43	3	20.996	37.136	20.996	37.136	10	2	-117	544	3	58	401677547.570	0.000	225	363	139	76	178	2012/12/10 06:33:35	1	25	123	209	55	64	118	201
5297	122197	NL	2012/12/10 06:33:26	2	20.997	37.137	20.997	37.137	8	0	-122	667	3	50	401677548.720	0.000	361	1575	82	98	403	2012/12/10 06:38:05	1	25	121	209	57	62	114	207
5297	122197	NM	2012/12/11 04:53:03	0	20.999	37.148	20.999	37.148	4	0	-122	139	3	50	401677548.860	0.000	3344	62479	179	94	3533	2012/12/11 04:53:25	1	26	129	209	51	82	118	193
5297	122197	MA	2012/12/11 06:08:35	2	20.993	37.141	20.993	37.141	11	0	-120	508	3	58	401677548.180	0.000	307	461	203	39	248	2012/12/11 06:11:58	1	26	114	208	57	61	110	202
5297	122197	NL	2012/12/11 06:16:05	2	20.997	37.141	20.997	37.141	7	0	-122	588	3	50	401677549.610	0.000	390	1521	99	101	285	2012/12/11 06:23:29	1	26	114	209	56	62	110	204
5297	122197	NP	2012/12/11 09:04:46	B	20.996	37.139	20.996	37.139	1	0	-136	0	3	8	401677549.360	0.000	2912	3231	2624	88	2502	2012/12/11 09:04:47	1	26	126	209	51	80	118	200
5297	122197	NP	2012/12/11 10:47:14	B	20.998	37.137	20.998	37.137	1	0	-127	0	3	8	401677554.020	0.000	3183	4065	2491	75	2995	2012/12/11 10:47:15	1	26	126	210	51	79	118	200
5297	122197	NM	2012/12/12 04:28:45	1	20.996	37.134	20.996	37.134	4	0	-125	511	3	50	401677549.840	0.000	643	708	582	149	472	2012/12/12 04:29:56	1	27	125	208	56	61	118	191
5297	122197	MA	2012/12/12 05:44:38	2	21.003	37.143	21.003	37.143	8	0	-125	415	3	50	401677551.060	0.000	333	686	161	18	519	2012/12/12 05:49:47	1	27	116	209	52	72	170	171
5297	122197	NL	2012/12/12 06:10:36	A	20.999	37.140	20.999	37.140	3	0	-124	233	3	0	401677550.380	0.000	378	1300	110	117	745	2012/12/12 06:11:03	1	27	118	210	49	78	110	196
5297	122197	MA	2012/12/12 07:25:15	3	20.999	37.130	20.999	37.130	9	4	-117	457	3	58	401677548.990	0.000	198	528	74	105	245	2012/12/12 07:31:19	1	27	117	209	51	75	110	197
5297	122197	NL	2012/12/12 07:49:29	A	20.998	37.128	20.998	37.128	3	0	-129	236	3	0	401677548.220	0.000	519	1075	250	128	762	2012/12/12 07:51:57	1	27	117	208	56	63	110	197
5297	122197	MA	2012/12/12 09:05:50	B	20.997	37.124	20.997	37.124	1	0	-130	0	3	8	401677548.660	0.000	665	769	575	116	1849	2012/12/12 09:05:50	1	27	117	209	55	66	110	199
5297	122197	NP	2012/12/12 10:33:29	A	20.991	37.127	20.991	37.127	3	0	-127	246	3	8	401677550.160	0.000	339	3013	38	67	888	2012/12/12 10:33:13	1	27	117	210	50	74	110	200
5297	122197	NM	2012/12/13 05:40:00	1	21.025	37.115	21.025	37.115	5	0	-124	262	3	50	401677550.700	0.000	576	1317	251	35	593	2012/12/13 05:43:37	1	28	117	207	56	62	110	193
5297	122197	NL	2012/12/13 05:53:13	2	21.023	37.115	21.023	37.115	4	0	-124	151	3	50	401677551.450	0.000	298	901	98	102	558	2012/12/13 05:54:29	1	28	121	209	51	77	110	191
5297	122197	MA	2012/12/13 07:07:13	B	21.021	37.112	21.021	37.112	1	0	-123	0	3	8	401677560.490	0.000	614	753	499	102	1703	2012/12/13 07:07:13	1	28	119	209	50	76	110	192
5297	122197	NL	2012/12/13 07:36:35	B	21.022	37.112	21.022	37.112	1	0	-130	0	3	8	401677552.340	0.000	722	843	617	99	2013	2012/12/13 07:36:36	1	28	116	209	49	77	110	201
5297	122197	NN	2012/12/13 10:55:13	B	21.011	37.113	21.011	37.113	2	0	-133	49	3	8	401677555.430	0.000	1000	1674	597	68	2736	2012/12/13 10:54:49	1	28	114	207	59	59	110	204
5297	122197	NP	2012/12/13 12:06:05	1	21.034	37.124	21.034	37.124	5	0	-128	349	3	58	401677548.300	0.000	626	3038	128	120	965	2012/12/13 12:05:43	1	28	116	209	51	76	110	201
5297	122197	NK	2012/12/13 12:23:12	A	21.032	37.129	21.032	37.129	3	0	-134	194	3	0	401677549.230	0.000	398	461	342	12	781	2012/12/13 12:23:33	1	28	120	208	53	72	110	197
5297	122197	NN	2012/12/13 12:33:22	B	21.030	37.130	21.030	37.130	2	0	-127	109	3	0	401677551.530	0.000	553	633	483	26	972	2012/12/13 12:32:28	1	28	118	209	50	78	110	194
5297	122197	NK	2012/12/13 14:04:35	A	21.031	37.127	21.031	37.127	3	0	-126	95	3	8	401677548.620	0.000	1323	11835	147	76	1456	2012/12/13 14:04:35	1	28	118	209	49	74	114	186
5297	122197	NL	2012/12/14 05:50:11	B	21.081	37.138	21.081	37.138	1	0	-138	0	3	0	401677555.160	0.000	7024	7703	6403	87	6031	2012/12/14 05:50:12	1	29	118	208	53	66	114	190
5297	122197	MA	2012/12/14 08:21:45	2	21.033	37.122	21.033	37.122	6	0	-123	497	3	58	401677547.210	0.000	266	306	231	161	335	2012/12/14 08:28:49	1	29	116	208	52	72	110	201
5297	122197	NP	2012/12/14 10:07:39	2	21.035	37.127	21.035	37.127	8	0	-127	481	3	58	401677548.420	0.000	266	757	93	56	257	2012/12/14 10:14:56	1	29	118	209	50	79	110	201
5297	122197	NP	2012/12/14 11:55:22	B	21.029	37.125	21.029	37.125	2	0	-129	347	3	8	401677546.540	0.000	1114	7355	168	109	1437	2012/12/14 11:49:35	1	29	114	206	61	55	110	205
5297	122197	NK	2012/12/14 13:38:57	2	21.035	37.137	21.035	37.137	5	0	-122	310	3	58	401677547.350	0.000	348	1513	80	51	398	2012/12/14 13:40:12	1	29	117	207	61	56	114	216
5297	122197	NN	2012/12/14 14:08:30	B	21.036	37.138	21.036	37.138	1	0	-133	0	3	0	401677548.150	0.000	751	866	650	63	1123	2012/12/14 14:08:30	1	29	117	207	58	61	114	189
5297	122197	NM	2012/12/15 04:57:06	3	20.936	37.189	20.936	37.189	5	0	-122	449	3	50	401677550.800	0.000	223	597	83	121	277	2012/12/15 04:58:27	1	30	119	207	56	61	114	187
5297	122197	NL	2012/12/15 05:35:05	B	20.935	37.190	20.935	37.190	1	0	-129	0	3	8	401677551.040	0.000	697	764	635	103	1221	2012/12/15 05:35:05	1	30	122	209	51	77	122	187
5297	122197	MA	2012/12/15 06:26:36	A	20.934	37.182	20.934	37.182	3	1	-118	305	3	8	401677547.380	0.000	1777	11546	273	84	1106	2012/12/15 06:28:11	1	30	119	209	51	74	114	190
5297	122197	NL	2012/12/15 07:10:50	3	20.926	37.198	20.926	37.198	5	0	-128	441	3	58	401677546.760	0.000	245	390	153	141	304	2012/12/15 07:16:43	1	30	118	144	52	69	110	191
5297	122197	NP	2012/12/15 09:58:23	B	20.855	37.245	20.855	37.245	1	0	-131	0	3	8	401677553.490	0.000	1426	1530	1327	96	2513	2012/12/15 09:58:23	1	30	118	208	52	68	110	191
5297	122197	NP	2012/12/15 11:40:15	B	20.914	37.205	20.914	37.205	2	0	-129	77	3	8	401677553.760	0.000	1145	3040	430	71	2393	2012/12/15 11:39:37	1	30	119	208	50	73	110	192
5297	122197	NN	2012/12/15 12:10:08	1	20.923	37.203	20.923	37.203	4	0	-125	509	3	50	401677551.600	0.000	1127	8887	143	77	933	2012/12/15 12:15:32	1	30	118	209	50	79	110	193
5297	122197	NK	2012/12/15 13:15:35	2	20.918	37.187	20.918	37.187	5	0	-125	401	3	58	401677551.430	0.000	326	1185	89	55	466	2012/12/15 13:15:06	1	30	122	216	55	67	110	192
5297	122197	NN	2012/12/15 13:57:29	B	20.912	37.188	20.912	37.188	1	0	-134	0	3	8	401677554.810	0.000	710	824	611	68	1336	2012/12/15 13:57:30	1	30	118	208	53	66	114	189
5297	122197	NK	2012/12/15 14:56:28	B	20.912	37.195	20.912	37.195	1	0	-124	0	3	8	401677560.060	0.000	1097	1832	656	160	3076	2012/12/15 14:56:29	1	30	120	209	51	72	114	186
5297	122197	NM	2012/12/16 04:35:49	0	20.918	37.241	20.918	37.241	4	0	-124	298	3	50	401677552.070	0.000	4553	125257	165	107	3335	2012/12/16 04:36:25	1	30	123	207	52	79	114	151
5297	122197	NL	2012/12/16 05:18:10	1	20.929	37.204	20.929	37.204	5	0	-126	347	3	50	401677550.640	0.000	639	1271	321	170	557	2012/12/16 05:18:30	1	31	119	208	51	69	114	186
5297	122197	MA	2012/12/16 06:04:35	2	20.920	37.209	20.920	37.209	7	0	-121	514	3	58	401677549.540	0.000	313	492	198	37	317	2012/12/16 06:07:34	1	31	118	207	57	85	110	195
5297	122197	NM	2012/12/16 06:10:29	B	20.919	37.212	20.919	37.212	2	0	-132	156	3	0	401677548.780	0.000	476	574	393	20	531	2012/12/16 06:10:29	1	31	119	208	19	75	110	191
5297	122197	NL	2012/12/16 06:57:19	3	20.925	37.212	20.925	37.212	5	0	-123	502	3	58	401677550.310	0.000	209	301	144	51	277	2012/12/16 07:04:06	1	31	118	209	50	74	114	191
5297	122197	MA	2012/12/16 07:40:49	2	20.913	37.215	20.913	37.215	7	0	-120	694	3	58	401677548.830	0.000	374	597	234	112	203	2012/12/16 07:49:55	1	31	116	207	60	59	110	191
5297	122197	NP	2012/12/16 11:33:40	0	20.923	37.188	20.923	37.188	4	0	-125	370	3	48	401677548.750	0.000	1615	9952	262	98	681	2012/12/16 11:33:16	1	31	119	208	51	78	110	196
5297	122197	NM	2012/12/17 04:13:20	B	20.838	37.205	20.838	37.205	1	0	-129	0	3	0	401677546.540	0.000	10145	10813	9517	102	6072	2012/12/17 04:13:21	1	31	124	207	51	79	114	176
5297	122197	NL	2012/12/17 05:07:34	A	20.924	37.212	20.924	37.212	3	0	-127	385	3	8	401677547.690	0.000	631	3605	110	30	1617	2012/12/17 05:06:00	1	31	122	207	52	72	114	179
5297	122197	MA	2012/12/17 05:41:12	B	20.927	37.216	20.927	37.216	2	0	-128	47	3	8	401677549.200	0.000	773	1336	446	26	1710	2012/12/17 05:40:49	1	31	121	207	53	69	114	180
5297	122197	NL	2012/12/17 06:50:30	1	20.932	37.220	20.932	37.220	4	0	-124	171	3	58	401677551.360	0.000	530	3026	92	87	1451	2012/12/17 06:52:36	1	32	119	207	50	70	114	184
5297	122197	MA	2012/12/17 07:25:16	B	20.929	37.218	20.929	37.218	2	2	-116	187	3	8	401677551.920	0.000	549	8666	34	104	1515	2012/12/17 07:23:43	1	32	118	207	53	69	114	189
5297	122197	NN	2012/12/17 13:36:19	B	20.914	37.197	20.914	37.197	2	0	-128	270	3	8	401677553.400	0.000	990	8570	114	130	2774	2012/12/17 13:31:50	1	32	121	207	53	73	114	189
5297	122197	NK	2012/12/17 14:04:29	1	20.926	37.201	20.926	37.201	6	0	-122	454	3	50	401677549.400	0.000	867	9124	82	78	741	2012/12/17 14:06:05	1	32	119	207	55	64	114	185
5297	122197	NL	2012/12/18 04:54:35	B	20.927	37.194	20.927	37.194	2	0	-131	320	3	0	401677556.170	0.000	3426	34461	340	46	3830	2012/12/18 04:54:36	1	32	119	206	53	67	114	183
5297	122197	NL	2012/12/18 06:33:53	2	20.916	37.191	20.916	37.191	5	0	-122	513	3	58	401677551.480	0.000	402	1304	124	99	482	2012/12/18 06:40:46	1	32	120	207	52	72	114	185
5297	122197	MA	2012/12/18 07:06:25	1	20.916	37.182	20.916	37.182	4	0	-120	348	3	58	401677550.000	0.000	1011	9135	111	103	731	2012/12/18 07:08:04	1	32	118	207	54	64	114	188
5297	122197	NP	2012/12/18 09:29:18	B	20.911	37.168	20.911	37.168	1	0	-131	0	3	8	401677555.830	0.000	2321	2773	1941	97	2399	2012/12/18 09:29:18	1	32	117	206	60	58	114	188
5297	122197	NK	2012/12/18 13:39:53	B	20.897	37.157	20.897	37.157	2	0	-130	448	3	8	401677554.630	0.000	2181	49939	95	52	3186	2012/12/18 13:36:10	1	33	118	206	60	59	114	184
5297	122197	NM	2012/12/18 14:52:49	1	20.925	37.181	20.925	37.181	5	0	-129	299	3	58	401677548.290	0.000	769	2112	280	23	788	2012/12/18 14:53:59	1	33	120	208	50	76	114	181
5297	122197	NM	2012/12/19 05:03:50	2	20.910	37.209	20.910	37.209	5	0	-120	392	3	50	401677552.310	0.000	317	1371	73	117	403	2012/12/19 05:05:27	1	33	121	206	52	70	114	181
5297	122197	NL	2012/12/19 06:24:15	1	20.896	37.225	20.896	37.225	7	0	-124	309	3	58	401677551.100	0.000	749	9077	61	99	752	2012/12/19 06:27:44	1	33	119	205	57	61	114	185
5297	122197	MA	2012/12/19 06:45:02	1	20.894	37.226	20.894	37.226	4	0	-121	192	3	50	401677550.050	0.000	1224	3341	448	120	929	2012/12/19 06:47:20	1	33	119	206	55	63	114	184
5297	122197	MA	2012/12/19 08:23:24	2	20.886	37.232	20.886	37.232	9	0	-120	389	3	58	401677550.670	0.000	290	647	129	149	392	2012/12/19 08:25:40	1	33	118	207	53	65	110	193
5297	122197	NP	2012/12/19 09:20:07	1	20.881	37.235	20.881	37.235	5	0	-131	330	3	58	401677549.320	0.000	916	1967	426	13	757	2012/12/19 09:21:23	1	34	114	206
5297	122197	NM	2012/12/20 04:39:15	0	20.921	37.220	20.921	37.220	7	0	-124	583	3	50	401677551.350	0.000	1651	63186	43	102	2492	2012/12/20 04:42:36	1	34	124	207	49	76	114	177
5297	122197	NL	2012/12/20 06:13:38	2	20.920	37.209	20.920	37.209	6	0	-124	375	3	58	401677549.980	0.000	323	3187	32	105	849	2012/12/20 06:18:05	1	34	117	203	65	54	114	183
5297	122197	MA	2012/12/20 06:21:39	2	20.921	37.209	20.921	37.209	5	1	-119	516	3	50	401677550.630	0.000	281	451	175	50	283	2012/12/20 06:24:07	1	34	120	206	54	65	114	184
5297	122197	NL	2012/12/20 07:53:49	B	20.912	37.199	20.912	37.199	2	0	-130	187	3	8	401677545.330	0.000	950	2635	342	154	1385	2012/12/20 07:52:16	1	34	119	206	53	68	114	189
5297	122197	MA	2012/12/20 08:05:02	A	20.919	37.207	20.919	37.207	3	0	-121	158	3	8	401677549.600	0.000	915	3314	252	89	1429	2012/12/20 08:04:40	1	34	122	207	50	73	114	184
5297	122197	NP	2012/12/20 09:09:08	B	20.917	37.212	20.917	37.212	1	0	-135	0	3	8	401677553.310	0.000	1348	2314	785	89	2179	2012/12/20 09:09:09	1	35	120	207	180	71	114	182
5297	122197	NM	2012/12/21 04:15:23	3	20.920	37.210	20.920	37.210	8	0	-126	540	3	50	401677551.470	0.000	212	476	94	92	181	2012/12/21 04:17:47	1	35	122	205	52	71	114	178
5297	122197	NM	2012/12/21 05:52:02	A	20.922	37.220	20.922	37.220	3	0	-129	206	3	8	401677554.650	0.000	954	2927	310	172	1191	2012/12/21 05:54:40	1	35	121	205	55	62	114	178
5297	122197	MA	2012/12/21 05:58:24	3	20.914	37.217	20.914	37.217	5	0	-120	441	3	50	401677552.010	0.000	174	240	125	105	274	2012/12/21 06:02:52	1	35	120	204	59	58	114	177
5297	122197	NL	2012/12/21 05:57:47	3	20.914	37.215	20.914	37.215	7	0	-122	562	3	50	401677551.810	0.000	195	326	115	93	183	2012/12/21 06:04:45	1	35	121	205	56	63	114	176
5297	122197	NL	2012/12/21 07:44:25	B	20.893	37.230	20.893	37.230	1	0	-136	0	3	0	401677550.070	0.000	261	474	143	114	593	2012/12/21 07:44:26	1	35	120	207	50	71	114	182
5297	122197	MA	2012/12/21 07:40:17	3	20.893	37.230	20.893	37.230	5	0	-121	384	3	58	401677550.300	0.000	243	1127	52	115	441	2012/12/21 07:45:55	1	35	122	206	54	67	114	182
5297	122197	NM	2012/12/22 03:54:20	B	20.804	37.297	20.804	37.297	1	0	-133	0	3	0	401677554.510	0.000	2295	2490	2115	126	6485	2012/12/22 03:54:21	1	36	124	206	52	73	118	174
5297	122197	NM	2012/12/22 05:31:11	2	20.923	37.214	20.923	37.214	8	0	-126	503	3	58	401677551.200	0.000	269	465	155	133	239	2012/12/22 05:34:36	1	36	117	202	64	51	114	178
5297	122197	MA	2012/12/22 05:38:43	B	20.901	37.191	20.901	37.191	2	0	-127	45	3	8	401677544.260	0.000	3733	11598	1201	158	6889	2012/12/22 05:38:21	1	36	123	206	49	73	114	177
5297	122197	NL	2012/12/22 05:45:51	3	20.917	37.213	20.917	37.213	8	0	-123	469	3	50	401677551.800	0.000	205	439	95	71	224	2012/12/22 05:52:45	1	36	122	205	49	75	114	181
5297	122197	MA	2012/12/22 07:18:36	2	20.903	37.228	20.903	37.228	8	3	-115	465	3	58	401677552.570	0.000	404	2064	79	106	520	2012/12/22 07:25:37	1	36	120	203	57	61	114	180
5297	122197	NL	2012/12/22 07:27:24	2	20.899	37.228	20.899	37.228	6	0	-125	339	3	50	401677551.370	0.000	467	1011	215	132	391	2012/12/22 07:32:09	2	36	122	205	51	71	114	177
5297	122197	MA	2012/12/22 08:59:04	B	20.925	37.217	20.925	37.217	1	0	-130	0	3	8	401677561.120	0.000	1991	2208	1794	166	2090	2012/12/22 08:59:05	1	37	124	221	53	67	114	180
5297	122197	NM	2012/12/23 05:08:47	2	20.912	37.222	20.912	37.222	5	0	-122	433	3	50	401677550.950	0.000	303	1745	52	116	461	2012/12/23 05:11:23	1	37	124	203	54	78	118	173
5297	122197	NL	2012/12/23 05:38:25	1	20.909	37.195	20.909	37.195	4	0	-126	233	3	50	401677550.160	0.000	979	5056	189	86	1149	2012/12/23 05:38:50	1	37	127	204	48	79	118	174
5297	122197	MA	2012/12/23 06:57:56	1	20.915	37.213	20.915	37.213	4	1	-119	288	3	58	401677551.490	0.000	505	1754	145	70	431	2012/12/23 07:01:32	1	37	121	204	53	63	114	177
5297	122197	NL	2012/12/23 07:16:58	1	20.916	37.217	20.916	37.217	4	0	-126	249	3	50	401677554.190	0.000	535	1690	169	120	537	2012/12/23 07:19:44	1	37	122	204	51	67	114	180
5297	122197	MA	2012/12/23 08:38:38	B	20.923	37.217	20.923	37.217	2	0	-125	45	3	8	401677555.320	0.000	1251	1433	1091	108	1818	2012/12/23 08:38:38	1	38	121	204	51	68	114	179
5297	122197	NM	2012/12/24 04:44:50	2	20.926	37.204	20.926	37.204	7	0	-124	422	3	50	401677552.350	0.000	483	6818	34	104	801	2012/12/24 04:46:59	1	38	123	202	52	67	114	177
5297	122197	NL	2012/12/24 05:23:30	3	20.921	37.206	20.921	37.206	8	0	-125	469	3	50	401677550.490	0.000	171	237	123	6	328	2012/12/24 05:26:43	1	38	121	202	53	63	114	177
5297	122197	NM	2012/12/24 06:23:24	B	20.918	37.210	20.918	37.210	1	0	-136	0	3	8	401677551.630	0.000	789	846	735	88	1521	2012/12/24 06:23:25	1	38	124	204	48	73	115	225
5297	122197	MA	2012/12/24 06:37:23	3	20.918	37.207	20.918	37.207	8	5	-117	460	3	58	401677549.050	0.000	194	451	83	84	215	2012/12/24 06:39:20	2	38	121	203	49	73	114	181
5297	122197	NL	2012/12/24 07:04:31	A	20.919	37.213	20.919	37.213	3	0	-124	352	3	0	401677550.170	0.000	233	491	110	131	345	2012/12/24 07:05:53	1	38	102	203	50	73	114	179
5297	122197	MA	2012/12/24 08:17:16	1	20.907	37.221	20.907	37.221	7	0	-121	374	3	58	401677544.550	0.000	596	1392	255	152	423	2012/12/24 08:22:20	1	39	118	202	54	61	114	190
5297	122197	NP	2012/12/24 10:06:50	3	20.923	37.205	20.923	37.205	4	0	-125	391	3	58	401677549.960	0.000	245	618	96	52	392	2012/12/24 10:08:22	1	39	121	204	49	75	114	185
5297	122197	NL	2012/12/25 05:12:07	2	20.918	37.209	20.918	37.209	4	0	-127	258	3	50	401677551.770	0.000	486	2084	113	32	1338	2012/12/25 05:13:16	1	39	121	201	55	63	114	177
5297	122197	NM	2012/12/25 05:59:12	B	20.918	37.208	20.918	37.208	1	0	-132	0	3	8	401677550.650	0.000	679	1084	425	34	1891	2012/12/25 05:59:13	1	39	119	199	61	56	114	253
5297	122197	MA	2012/12/25 06:13:42	A	20.922	37.210	20.922	37.210	3	0	-124	164	3	8	401677549.640	0.000	403	1365	118	105	1090	2012/12/25 06:15:34	1	39	121	200
5297	122197	NL	2012/12/25 06:55:01	1	20.916	37.220	20.916	37.220	5	0	-121	280	3	58	401677550.280	0.000	1193	6768	210	84	1166	2012/12/25 06:57:59	1	39	118	199	60	55	114	183
5297	122197	MA	2012/12/25 07:58:17	2	20.912	37.211	20.912	37.211	8	3	-118	412	3	58	401677549.890	0.000	308	951	99	117	304	2012/12/25 08:03:16	1	39	119	200	56	61	114	188
5297	122197	NL	2012/12/26 04:59:47	1	20.892	37.233	20.892	37.233	6	0	-131	317	3	50	401677548.710	0.000	1156	3371	396	13	943	2012/12/26 05:01:26	1	40	120	200	55	67	114	181
5297	122197	NM	2012/12/26 05:36:17	2	20.898	37.232	20.898	37.232	4	0	-125	287	3	58	401677551.770	0.000	334	973	114	164	662	2012/12/26 05:37:19	1	40	118	200
5297	122197	MA	2012/12/26 06:00:22	B	20.891	37.233	20.891	37.233	1	0	-128	0	3	8	401677553.120	0.000	1883	2247	1577	17	1779	2012/12/26 06:00:23	1	40	121	202	54	62	118	172
5297	122197	NL	2012/12/26 06:41:45	A	20.897	37.237	20.897	37.237	3	0	-130	281	3	8	401677551.330	0.000	567	4802	67	94	1254	2012/12/26 06:42:10	1	40	123	201	52	64	118	169
5297	122197	MA	2012/12/26 07:33:22	3	20.914	37.210	20.914	37.210	7	5	-116	525	3	58	401677551.830	0.000	169	350	81	102	241	2012/12/26 07:39:13	2	40	121	200	55	60	118	173
5297	122197	NP	2012/12/26 09:46:41	B	20.927	37.195	20.927	37.195	1	0	-129	0	3	8	401677548.940	0.000	1514	1693	1353	82	2192	2012/12/26 09:46:41	1	40	113	201	56	61	106	177
5297	122197	NP	2012/12/26 11:28:32	3	20.923	37.192	20.923	37.192	4	0	-125	491	3	58	401677550.190	0.000	214	419	109	107	283	2012/12/26 11:27:29	1	41	124	202	50	79	114	55
5297	122197	MA	2012/12/27 05:37:22	0	20.902	37.218	20.902	37.218	4	0	-128	178	3	50	401677554.710	0.000	2211	9062	539	29	2635	2012/12/27 05:37:56	1	41	123	201	57	198	35	224
5297	122197	NL	2012/12/27 06:31:16	2	20.901	37.212	20.901	37.212	4	0	-126	156	3	58	401677551.900	0.000	486	1229	192	102	1333	2012/12/27 06:32:33	1	41	114	199	57	59	110	165
5297	122197	MA	2012/12/27 07:16:20	0	20.903	37.214	20.903	37.214	8	0	-121	402	3	58	401677552.290	0.000	2195	49750	96	102	1243	2012/12/27 07:22:00	1	41	120	198	59	57	114	175
5297	122197	MA	2012/12/27 08:56:32	B	20.905	37.208	20.905	37.208	1	0	-129	0	3	8	401677552.350	0.000	3707	5460	2516	101	2302	2012/12/27 08:56:33	1	41	247	199	58	57	114	243
5297	122197	NP	2012/12/27 09:34:07	A	20.898	37.218	20.898	37.218	3	0	-131	219	3	8	401677549.620	0.000	440	1326	146	33	1194	2012/12/27 09:34:22	1	42	124	201	51	212	158	26
5297	122197	NL	2012/12/28 06:17:41	1	20.892	37.228	20.892	37.228	6	0	-126	428	3	50	401677552.220	0.000	614	4545	83	99	463	2012/12/28 06:20:17	1	46	87	07	03	175	176	90
5297	122197	NM	2012/12/28 06:27:10	B	20.892	37.228	20.892	37.228	1	0	-134	0	3	0	401677553.310	0.000	859	1339	551	98	755	2012/12/28 06:27:11	1	42	116	199	56	61	110	168
5297	122197	MA	2012/12/28 06:52:58	3	20.892	37.220	20.892	37.220	8	4	-116	481	3	50	401677551.610	0.000	182	456	72	89	217	2012/12/28 07:00:16	1	42	83	142	111	47	56	226
5297	122197	NL	2012/12/28 07:58:02	B	20.891	37.223	20.891	37.223	2	0	-131	127	3	8	401677548.610	0.000	1298	2333	722	141	1256	2012/12/28 07:56:59	1	42	114	199	58	58	110	165
5297	122197	MA	2012/12/28 08:32:34	2	20.892	37.224	20.892	37.224	6	0	-125	426	3	58	401677546.990	0.000	260	513	131	28	631	2012/12/28 08:38:08	1	43	121	201	51	73	114	190
5297	122197	NM	2012/12/29 04:26:09	2	20.930	37.212	20.930	37.212	6	0	-125	463	3	50	401677550.990	0.000	334	1398	79	98	318	2012/12/29 04:28:16	1	43	116	199	55	62	110	164
5297	122197	NM	2012/12/29 06:04:22	B	20.936	37.222	20.936	37.222	1	0	-138	0	3	0	401677552.440	0.000	192	333	110	87	255	2012/12/29 06:04:22	1	43	117	201	50	73	110	177
5297	122197	NL	2012/12/29 06:03:54	3	20.937	37.222	20.937	37.222	7	0	-125	484	3	58	401677551.950	0.000	181	254	128	78	244	2012/12/29 06:09:00	1	43	113	201	50	70	106	181
5297	122197	MA	2012/12/29 06:32:02	2	20.932	37.216	20.932	37.216	12	0	-120	613	3	50	401677550.590	0.000	250	405	154	83	148	2012/12/29 06:40:49	1	43	111	199	56	60	106	185
5297	122197	NL	2012/12/29 07:42:31	1	20.931	37.218	20.931	37.218	4	0	-125	316	3	58	401677550.550	0.000	774	1676	357	168	657	2012/12/29 07:44:06	1	43	118	199	58	56	114	184
5297	122197	MA	2012/12/29 08:12:23	3	20.934	37.226	20.934	37.226	7	0	-123	466	3	50	401677551.910	0.000	223	332	149	167	411	2012/12/29 08:18:01	1	43	122	201	48	74	114	184
5297	122197	NN	2012/12/29 11:24:35	B	20.935	37.229	20.935	37.229	1	0	-124	0	3	8	401677554.700	0.000	1702	1897	1527	72	2610	2012/12/29 11:24:35	1	43	123	203	51	70	118	175
5297	122197	NN	2012/12/30 11:06:39	B	20.931	37.222	20.931	37.222	1	0	-134	0	3	0	401677546.940	0.000	4456	4904	4049	111	7503	2012/12/30 11:06:40	1	43	125	203	49	74	118	170
5297	122197	NN	2012/12/30 12:52:53	3	20.935	37.191	20.935	37.191	11	0	-124	591	3	58	401677549.970	0.000	213	331	136	93	149	2012/12/30 12:55:01	1	44	122	201	49	68	114	182
5297	122197	NK	2012/12/30 13:49:37	1	20.932	37.185	20.932	37.185	5	0	-122	386	3	58	401677551.310	0.000	648	4663	90	75	471	2012/12/30 13:49:04	1	44	125	200	51	68	118	170
5297	122197	NM	2012/12/30 15:08:16	B	20.932	37.176	20.932	37.176	1	0	-125	0	3	8	401677551.820	0.000	1942	2275	1656	83	1763	2012/12/30 15:08:17	1	44	125	201	51	69	118	168
5297	122197	NM	2012/12/31 05:16:31	3	20.934	37.189	20.934	37.189	6	0	-124	381	3	50	401677549.700	0.000	198	266	146	133	229	2012/12/31 05:17:47	1	44	123	200	51	66	118	169
5297	122197	NL	2012/12/31 05:41:16	2	20.933	37.185	20.933	37.185	8	0	-125	538	3	50	401677550.390	0.000	291	532	158	55	236	2012/12/31 05:44:45	1	44	123	200	52	64	118	168
5297	122197	MA	2012/12/31 05:52:46	2	20.930	37.190	20.930	37.190	5	0	-124	381	3	50	401677549.480	0.000	269	480	151	0	577	2012/12/31 05:53:48	1	44	122	200	53	62	118	171
5297	122197	NP	2012/12/31 12:16:56	B	20.921	37.175	20.921	37.175	1	0	-129	0	3	8	401677554.050	0.000	1428	1606	1269	100	3709	2012/12/31 12:16:56	1	44	113	199	48	62	110	176
5297	122197	NN	2012/12/31 12:41:50	3	20.932	37.184	20.932	37.184	6	0	-122	650	3	50	401677551.020	0.000	159	281	90	75	239	2012/12/31 12:42:34	1	44	115	199	55	62	110	175
5297	122197	NK	2012/12/31 13:25:24	3	20.925	37.181	20.925	37.181	8	0	-122	410	3	58	401677551.540	0.000	235	373	148	26	305	2012/12/31 13:26:27	1	45	112	197	61	55	110	174
5297	122197	NM	2012/12/31 14:44:16	1	20.926	37.180	20.926	37.180	4	0	-131	158	3	58	401677552.770	0.000	767	1783	330	37	1250	2012/12/31 14:44:39	1	45	123	200	51	69	118	168
5297	122197	NK	2012/12/31 15:03:39	A	20.934	37.180	20.934	37.180	3	0	-126	246	3	8	401677550.150	0.000	775	3106	193	124	999	2012/12/31 15:03:01	1	45	124	199	53	64	118	168
5297	122197	NM	2013/01/01 04:54:19	3	20.939	37.190	20.939	37.190	5	0	-122	423	3	50	401677550.700	0.000	234	779	70	110	266	2013/01/01 04:56:45	1	45	116	199	54	62	110	167
5297	122197	NL	2013/01/01 05:29:03	2	20.939	37.192	20.939	37.192	4	0	-126	201	3	58	401677553.420	0.000	287	740	111	63	741	2013/01/01 05:29:41	1	45	116	200	52	64	110	169
5297	122197	NL	2013/01/01 07:08:10	B	20.940	37.199	20.940	37.199	2	0	-124	146	3	8	401677551.060	0.000	841	4625	152	172	1520	2013/01/01 07:06:58	1	45	115	201	51	69	110	171
5297	122197	MA	2013/01/01 07:09:24	A	20.943	37.185	20.943	37.185	3	0	-121	607	3	8	401677550.550	0.000	1118	2511	497	91	1766	2013/01/01 07:18:04	1	45	117	202	49	76	110	172
5297	122197	MA	2013/01/01 08:52:56	B	20.946	37.195	20.946	37.195	2	0	-129	148	3	8	401677552.440	0.000	1150	2586	511	155	1761	2013/01/01 08:52:57	1	45	115	199	54	61	110	173
5297	122197	NP	2013/01/01 10:18:36	B	20.945	37.196	20.945	37.196	1	0	-133	0	3	8	401677547.550	0.000	1312	1767	973	149	2462	2013/01/01 10:18:36	1	46	126	202	48	77	118	173
5297	122197	NP	2013/01/01 12:03:31	1	20.942	37.194	13.309	3.072	4	0	-128	345	3	58	401677544.280	0.000	984	4010	241	119	1270	2013/01/01 12:02:51	1	46	121	200	53	64	114	185
5297	122197	NP	2013/01/02 11:52:50	B	20.846	37.161	20.846	37.161	2	0	-127	337	3	0	401677545.450	0.000	2184	51034	93	107	4909	2013/01/02 11:47:13	1	46	120	201	50	69	118	173
5297	122197	NN	2013/01/02 12:12:17	0	20.837	37.181	20.837	37.181	4	0	-124	354	3	40	401677550.220	0.000	3128	35919	272	80	1289	2013/01/02 12:15:31	1	46	123	201	50	76	118	174
5297	122197	NN	2013/01/02 14:01:49	B	20.835	37.186	20.835	37.186	1	0	-134	0	3	8	401677551.410	0.000	859	1252	588	82	2397	2013/01/02 14:01:49	1	46	123	201	19	202	118	171
5297	122197	NK	2013/01/02 14:17:26	2	20.841	37.188	20.841	37.188	4	0	-122	165	3	50	401677552.800	0.000	414	785	218	63	318	2013/01/02 14:17:18	1	46	123	201	49	73	118	171
5297	122197	NM	2013/01/03 04:08:36	B	20.829	37.186	20.829	37.186	2	0	-126	109	3	0	401677549.180	0.000	2772	25599	300	118	3919	2013/01/03 04:07:42	1	46	122	200	58	57	118	167
5297	122197	NL	2013/01/03 05:02:54	1	20.846	37.183	20.846	37.183	4	0	-130	308	3	50	401677551.560	0.000	945	2053	434	9	895	2013/01/03 05:03:20	1	46	116	201	49	73	110	169
5297	122197	NM	2013/01/03 05:46:09	B	20.844	37.181	20.844	37.181	2	0	-127	100	3	8	401677551.860	0.000	873	1705	446	149	1186	2013/01/03 05:45:20	1	46	113	196	63	54	110	169
5297	122197	NN	2013/01/03 12:01:08	B	20.911	37.182	20.911	37.182	2	0	-131	227	3	8	401677551.630	0.000	2233	11003	453	100	2886	2013/01/03 12:04:56	2	47	116	201	51	71	110	175
5297	122197	NN	2013/01/03 13:49:56	B	20.920	37.183	20.920	37.183	2	0	-130	94	3	8	401677550.520	0.000	815	1237	536	14	1789	2013/01/03 13:49:10	1	47	121	199	55	66	118	174
5297	122197	NK	2013/01/03 13:50:06	0	20.923	37.184	20.923	37.184	5	0	-122	370	3	40	401677548.950	0.000	1525	10785	215	75	503	2013/01/03 13:51:37	1	47	125	200	50	69	118	171
5297	122197	NM	2013/01/03 15:12:13	B	20.930	37.182	20.930	37.182	1	0	-128	0	3	8	401677547.850	0.000	4461	5180	3841	84	1810	2013/01/03 15:12:13	1	47	115	200	57	73	110	167
5297	122197	NL	2013/01/04 04:50:55	A	20.922	37.216	20.922	37.216	3	0	-131	126	3	0	401677552.380	0.000	1168	3913	348	11	3289	2013/01/04 04:50:56	1	47	118	200	52	66	110	164
5297	122197	NM	2013/01/04 05:22:35	1	20.912	37.222	20.912	37.222	5	0	-126	221	3	58	401677554.590	0.000	638	1639	248	143	505	2013/01/04 05:23:30	1	47	116	200	50	67	110	167
5297	122197	MA	2013/01/04 06:11:35	2	20.898	37.222	20.898	37.222	10	0	-122	534	3	58	401677549.220	0.000	334	465	239	52	238	2013/01/04 06:15:30	1	47	115	199	51	64	110	170
5297	122197	NL	2013/01/04 06:28:49	1	20.904	37.215	20.904	37.215	10	0	-120	589	3	58	401677551.030	0.000	617	8513	44	100	1489	2013/01/04 06:36:50	1	47	112	197	61	54	110	179
5297	122197	MA	2013/01/04 07:49:35	2	20.902	37.223	20.902	37.223	10	3	-116	520	3	58	401677549.060	0.000	262	558	123	119	177	2013/01/04 07:56:43	1	48	119	198	57	58	114	179
5297	122197	NL	2013/01/04 08:14:27	B	20.904	37.224	20.904	37.224	1	0	-134	0	3	0	401677547.560	0.000	781	824	739	75	1009	2013/01/04 08:14:27	1	48	119	197	60	53	114	176
5297	122197	MA	2013/01/05 05:48:20	B	20.784	37.217	20.784	37.217	1	0	-126	0	3	0	401677484.430	0.000	7399	9751	5614	81	6395	2013/01/05 05:48:21	1	48	125	202	52	67	118	166
5297	122197	NL	2013/01/05 08:03:31	B	20.869	37.221	20.869	37.221	1	0	-134	0	3	8	401677535.040	0.000	16991	44681	6461	2	15478	2013/01/05 08:03:31	1	48	121	200	56	60	118	173
5297	122197	NP	2013/01/05 09:37:23	A	20.912	37.185	20.912	37.185	3	0	-128	293	3	8	401677549.510	0.000	461	1964	108	51	1256	2013/01/05 09:37:51	1	48	121	201	51	73	118	175
5297	122197	NK	2013/01/05 14:45:37	2	20.881	37.178	20.881	37.178	4	0	-125	188	3	68	401677547.390	0.000	346	1743	68	69	893	2013/01/05 14:45:51	1	48	122	199	56	60	118	169
5297	122197	NM	2013/01/06 04:34:22	1	20.869	37.213	20.869	37.213	4	0	-125	544	3	50	401677548.890	0.000	723	10053	51	101	1526	2013/01/06 04:35:33	1	48	116	201	49	67	110	169
5297	122197	NL	2013/01/06 06:12:37	B	20.866	37.210	20.866	37.210	1	0	-131	0	3	8	401677549.000	0.000	902	1504	541	100	2530	2013/01/06 06:12:38	1	48	114	201	56	60	110	172
5297	122197	NP	2013/01/06 11:13:04	2	20.868	37.220	20.868	37.220	4	0	-123	517	3	58	401677549.570	0.000	259	686	97	80	273	2013/01/06 11:10:17	1	48	112	199	59	58	110	177
5297	122197	NN	2013/01/06 13:18:12	B	20.869	37.217	20.869	37.217	2	0	-128	219	3	8	401677548.710	0.000	747	4914	113	62	1551	2013/01/06 13:16:23	1	48	117	201	50	67	110	170
5297	122197	NM	2013/01/07 15:16:21	B	20.903	37.213	20.903	37.213	2	0	-128	244	3	0	401677550.910	0.000	1921	44137	83	79	5418	2013/01/07 15:14:19	1	49	124	199	53	63	118	165
5297	122197	MA	2013/01/08 06:23:12	B	20.912	37.213	20.912	37.213	2	1	-119	283	3	0	401677544.350	0.000	1866	57679	60	113	5267	2013/01/08 06:23:13	1	49	117	201	49	72	110	169
5297	122197	MA	2013/01/08 08:05:57	B	20.920	37.193	20.920	37.193	2	0	-122	349	3	8	401677548.670	0.000	618	4461	85	167	1714	2013/01/08 08:05:58	1	49	117	202	51	99	110	170
5297	122197	NP	2013/01/08 09:06:55	B	20.920	37.191	20.920	37.191	2	0	-135	103	3	8	401677549.060	0.000	696	1438	336	178	1936	2013/01/08 09:06:04	1	49	115	202
5297	122197	NP	2013/01/08 10:43:19	B	20.922	37.186	20.922	37.186	1	0	-129	0	3	8	401677547.530	0.000	968	1257	744	177	2712	2013/01/08 10:43:20	1	49	113	198	57	56	110	231
5297	122197	NN	2013/01/08 11:13:10	B	20.923	37.187	20.923	37.187	1	0	-130	0	3	0	401677549.370	0.000	1025	1118	939	174	2876	2013/01/08 11:13:10	1	49	115	202	50	66	110	168
5297	122197	NP	2013/01/09 12:18:57	B	20.925	37.188	20.925	37.188	2	0	-134	126	3	0	401677551.560	0.000	1721	10722	276	13	4853	2013/01/09 12:17:55	1	53	116	202	52	09	68	160
5297	122197	NM	2013/01/09 14:30:50	B	20.928	37.188	20.928	37.188	1	0	-134	0	3	8	401677548.260	0.000	1908	5244	694	13	5384	2013/01/09 14:30:50	1	49	118	201	48	74	110	164
5297	122197	NK	2013/01/09 14:46:24	B	20.924	37.182	20.924	37.182	1	0	-124	0	3	8	401677547.870	0.000	1655	3733	733	16	4665	2013/01/09 14:46:24	1	49	118	200	53	71	110	163
5297	122197	MA	2013/01/10 07:28:31	B	20.925	37.144	20.925	37.144	1	1	-118	0	3	0	401677551.740	0.000	2067	3287	1300	85	5839	2013/01/10 07:28:31	1	63	173	110	199	237	36	09
5297	122197	NP	2013/01/10 10:23:55	2	20.922	37.185	20.922	37.185	4	0	-124	364	3	58	401677550.450	0.000	335	1498	75	68	473	2013/01/10 10:24:53	1	49	116	198	57	59	110	165
5297	122197	NP	2013/01/10 12:07:07	B	20.915	37.183	20.915	37.183	2	0	-133	260	3	8	401677551.130	0.000	574	2627	125	110	1452	2013/01/10 12:02:48	1	49	113	197	56	56	110	173
5297	122197	NN	2013/01/10 12:32:44	A	20.919	37.179	20.919	37.179	3	0	-125	99	3	0	401677553.710	0.000	351	2202	55	71	916	2013/01/10 12:32:45	1	49	118	201	52	73	110	169
5297	122197	NK	2013/01/10 12:42:16	B	20.922	37.187	20.922	37.187	2	0	-130	49	3	0	401677550.150	0.000	422	1027	172	69	1130	2013/01/10 12:41:52	1	49	114	198	57	56	110	172
5297	122197	NK	2013/01/10 14:22:55	B	20.926	37.188	20.926	37.188	2	0	-125	286	3	8	401677547.650	0.000	624	8894	43	101	1720	2013/01/10 14:18:10	1	49	116	199	54	61	110	165
5297	122197	NM	2013/01/11 05:58:35	B	20.935	37.206	20.935	37.206	1	0	-133	0	3	0	401677551.180	0.000	2071	2606	1644	83	5848	2013/01/11 05:58:36	1	17	102	201	16	67	114	158
5297	122197	MA	2013/01/11 08:48:11	B	20.932	37.200	20.932	37.200	1	0	-127	0	3	8	401677551.790	0.000	2423	3269	1796	73	6846	2013/01/11 08:48:12	1	49	118	200	51	65	110	164
5297	122197	NP	2013/01/11 10:12:59	B	20.927	37.198	20.927	37.198	1	0	-132	0	3	8	401677547.130	0.000	2142	3955	1159	93	6048	2013/01/11 10:12:59	1	50	114	197	61	55	108	167
5297	122197	NP	2013/01/12 11:46:49	3	20.922	37.192	20.922	37.192	5	0	-128	506	3	50	401677551.060	0.000	212	298	150	135	291	2013/01/12 11:47:58	1	50	115	200	50	66	110	163
5297	122197	NN	2013/01/12 12:04:45	B	20.922	37.192	20.922	37.192	1	0	-126	0	3	0	401677549.540	0.000	427	457	397	105	870	2013/01/12 12:04:46	1	50	115	197	63	54	114	161
5297	122197	NN	2013/01/12 13:46:22	B	20.922	37.192	20.922	37.192	1	0	-134	0	3	8	401677552.640	0.000	868	927	811	87	2123	2013/01/12 13:46:23	1	50	119	201	51	66	114	157
5297	122197	NM	2013/01/12 15:00:10	2	20.925	37.194	20.925	37.194	5	0	-126	408	3	58	401677550.570	0.000	491	830	290	14	422	2013/01/12 15:01:40	1	50	117	197	55	69	114	157
5297	122197	NK	2013/01/13 13:07:18	B	20.924	37.202	20.924	37.202	1	0	-125	0	3	0	401677548.530	0.000	5659	8168	3920	95	6212	2013/01/13 13:07:18	1	50	118	201	53	63	114	157
5297	122197	NM	2013/01/13 14:37:00	B	20.923	37.206	20.923	37.206	2	0	-131	109	3	8	401677552.010	0.000	2828	12201	655	10	4001	2013/01/13 14:36:06	1	50	117	197	57	57	114	156
5297	122197	NK	2013/01/13 14:47:21	2	20.929	37.202	20.929	37.202	5	0	-123	386	3	50	401677549.300	0.000	289	710	117	123	348	2013/01/13 14:49:34	1	50	120	199	49	65	114	156
5297	122197	NK	2013/01/14 12:43:00	B	20.930	37.211	20.930	37.211	1	0	-130	0	3	0	401677548.820	0.000	3780	5035	2837	92	6381	2013/01/14 12:43:00	1	50	120	201	48	69	114	155
5297	122197	NN	2013/01/14 13:32:07	B	20.918	37.176	20.918	37.176	2	0	-131	570	3	0	401677552.500	0.000	2475	42485	144	153	4818	2013/01/14 13:22:38	1	50	122	198	54	24	67	78
5297	122197	NK	2013/01/14 14:23:28	A	20.931	37.176	20.931	37.176	3	0	-124	222	3	8	401677550.400	0.000	796	5314	119	72	904	2013/01/14 14:21:35	1	50	120	200	49	73	114	156
5297	122197	MA	2013/01/15 05:43:38	B	20.978	37.231	20.978	37.231	2	0	-129	406	3	0	401677562.040	0.000	3373	37554	302	21	3877	2013/01/15 05:40:15	1	50	119	200	52	62	114	147
5297	122197	NM	2013/01/15 06:00:36	B	20.952	37.221	20.952	37.221	1	0	-131	0	3	0	401677558.000	0.000	5477	61176	490	21	7714	2013/01/15 06:00:36	1	50	120	200	52	63	114	154
5297	122197	NL	2013/01/15 06:00:36	B	20.944	37.218	20.944	37.218	1	0	-125	0	3	0	401677556.390	0.000	4317	37924	491	20	6077	2013/01/15 06:00:36	1	50	120	200	52	63	114	154
5297	122197	NN	2013/01/15 13:11:08	B	20.976	37.227	20.976	37.227	1	0	-133	0	3	8	401677558.370	0.000	1931	3011	1238	30	5449	2013/01/15 13:11:09	1	50	121	199	52	73	114	156
5297	122197	NK	2013/01/15 13:58:26	0	20.941	37.184	20.941	37.184	5	0	-125	317	3	48	401677550.360	0.000	7201	125805	412	82	3142	2013/01/15 13:56:55	1	51	124	197	55	86	114	158
5297	122197	NM	2013/01/16 15:02:58	B	20.873	36.873	20.873	36.873	2	0	-131	82	3	0	401677599.130	0.000	9443	65375	1363	78	5807	2013/01/16 15:02:17	1	51	119	199	52	61	114	155
5297	122197	NN	2013/01/17 12:52:49	B	20.860	37.065	20.860	37.065	1	0	-130	0	3	0	401677538.380	0.000	11971	24349	5885	56	8222	2013/01/17 12:52:50	1	51	118	202	49	69	110	168
5297	122197	NK	2013/01/17 13:10:07	B	20.923	37.197	20.923	37.197	1	0	-126	0	3	0	401677562.340	0.000	2668	4640	1533	64	7537	2013/01/17 13:10:07	1	51	118	201	51	64	110	164
5297	122197	NK	2013/01/17 14:48:35	A	20.943	37.222	20.943	37.222	3	0	-124	442	3	8	401677554.550	0.000	395	2072	75	118	835	2013/01/17 14:47:30	1	51	119	200	49	66	114	155
5297	122197	NK	2013/01/18 14:23:10	B	20.952	37.184	20.952	37.184	1	0	-126	0	3	0	401677542.560	0.000	2505	2673	2346	62	7074	2013/01/18 14:23:10	1	51	116	202	52	65	110	172
5297	122197	NP							1	0	-134	0			401650000.000	0.000						2013/03/10 11:32:09	1	51	116	196	44	73	110	177
5297	122197	NM							1	0	-133	0			401650000.000	0.000						2013/03/13 14:37:31	1	51	117	195	44	71	110	172
5297	122197	NN							2	0	-129	92			401650000.000	0.000						2013/03/14 12:34:17	1	51	118	191	55	60	114	187
5297	122197	NN	2013/03/15 12:26:20	A	20.935	37.092	21.105	37.853	3	0	-127	317	0	50	401677541.300	0.000	522	26633	10	77	5971	2013/03/15 12:27:29	1	51	122	194	45	70	114	180
5297	122197	NK	2013/03/15 13:19:32	B	20.936	37.107	21.079	37.774	2	0	-126	225	3	7	401677560.380	0.000	2220	64574	76	77	5739	2013/03/15 13:17:40	1	51	125	195	44	77	114	183
5297	122197	NP	2013/03/16 10:32:36	B	20.952	37.188	21.151	37.661	2	0	-131	122	3	0	401677548.280	0.000	2346	100291	54	66	6626	2013/03/16 10:30:34	1	51	119	193	52	63	114	191
5297	122197	NK	2013/03/16 14:36:41	B	20.974	37.247	20.974	37.247	2	0	-124	499	3	8	401677542.280	0.000	794	7276	86	136	2210	2013/03/16 14:32:32	1	51	121	190	53	61	114	179
5297	122197	NM	2013/03/16 15:04:53	2	20.976	37.228	20.976	37.228	4	0	-123	198	3	68	401677544.440	0.000	411	1931	87	56	1090	2013/03/16 15:05:28	1	51	121	190	50	64	118	167
5297	122197	NN	2013/03/17 12:00:13	B	21.015	37.352	21.015	37.352	1	0	-136	0	3	0	401677533.130	0.000	2448	2637	2271	85	6914	2013/03/17 12:00:14	1	52	122	192	51	66	114	179
5297	122197	NN							1	0	-134	0			401650000.000	0.000						2013/03/18 13:31:24	1	52	120	189	56	61	114	181
5297	122197	NK							1	0	-128	0			401650000.000	0.000						2013/04/17 14:58:41	1	144	63	117	54	221	04	11
5297	122197	NK							2	0	-129	70			401650000.000	0.000						2013/04/18 14:29:16	1	52	120	189	48	58	114	189
5297	122197	NL	2013/04/19 05:25:52	1	20.995	37.228	20.995	37.228	6	0	-131	325	3	58	401677532.740	0.000	794	2203	285	50	716	2013/04/19 05:27:32	2	53	122	189	47	58	114	184
5297	122197	MA	2013/04/19 06:38:52	A	20.997	37.225	20.997	37.225	3	0	-123	214	3	8	401677533.690	0.000	333	1923	57	96	882	2013/04/19 06:39:14	1	53	122	187	50	57	115	180
5297	122197	NL	2013/04/19 07:08:28	3	20.992	37.234	20.992	37.234	5	0	-129	426	3	50	401677534.830	0.000	183	508	65	115	284	2013/04/19 07:10:44	1	53	123	189	49	58	114	182
5297	122197	NP	2013/04/19 11:09:10	B	21.028	37.260	21.028	37.260	2	0	-122	229	3	8	401677547.030	0.000	737	6863	79	126	2051	2013/04/19 11:07:16	1	53	120	123	190	59	235	255
5297	122197	NN	2013/04/19 12:39:00	B	21.030	37.260	21.030	37.260	1	0	-136	0	3	8	401677537.980	0.000	974	1802	526	125	2729	2013/04/19 12:39:00	1	53	122	192	45	61	114	187
5297	122197	NK	2013/04/19 14:07:08	B	21.031	37.261	21.031	37.261	1	0	-127	0	3	8	401677547.990	0.000	1149	1751	753	120	3225	2013/04/19 14:07:09	1	53	121	189	49	61	114	184
5297	122197	NL	2013/04/20 05:14:03	B	21.043	37.267	21.043	37.267	1	0	-134	0	3	0	401677548.830	0.000	2135	3046	1495	100	6030	2013/04/20 05:14:03	1	54	122	188	49	57	114	180
5297	122197	MA	2013/04/20 06:18:21	B	21.046	37.255	21.046	37.255	2	0	-126	107	3	8	401677551.810	0.000	1547	15762	151	58	4365	2013/04/20 06:17:28	1	23	242	171	240	205	187	223
5297	122197	NL	2013/04/20 06:57:59	B	21.028	37.226	21.028	37.226	2	0	-129	163	3	8	401677535.210	0.000	1222	5064	294	76	2175	2013/04/20 06:56:38	1	54	121	189	47	59	114	185
5297	122197	NN							1	0	-140	0			401650000.000	0.000						2013/04/22 12:04:21	1	54	53	162	129	60	183	104
5297	122197	NK							1	0	-133	0			401650000.000	0.000						2013/04/22 12:53:53	1	54	121	188	50	58	114	182
5297	122197	NN							1	0	-136	0			401650000.000	0.000						2013/04/22 13:49:55	1	54	122	186	53	60	114	182
5297	122197	NK							1	0	-134	0			401650000.000	0.000						2013/04/23 14:06:45	1	55	123	186	54	61	50	180
5297	122197	NL							1	0	-126	0			401650000.000	0.000						2013/04/24 06:05:23	1	55	122	187	53	57	114	180
5297	122197	NP							1	0	-138	0			401650000.000	0.000						2013/04/24 10:12:14	1	55	120	185	55	59	114	182
5297	122197	NP							1	0	-131	0			401650000.000	0.000						2013/04/24 11:56:06	1	55	122	186	56	59	112	183
5297	122197	NK	2013/04/24 13:43:19	B	21.126	37.230	21.126	37.230	2	0	-130	125	3	0	401677526.370	0.000	6383	163424	249	97	10500	2013/04/24 13:42:17	1	55	123	187	51	61	114	181
5297	122197	NL							1	0	-134	0			401650000.000	0.000						2013/04/26 05:40:15	1	55	123	188	49	61	114	179
5297	122197	MA							1	0	-128	0			401650000.000	0.000						2013/04/26 07:35:14	1	55	121	191	44	65	50	184
5297	122197	NK	2013/04/27 14:11:55	B	21.135	37.208	21.135	37.208	2	0	-128	260	3	0	401677533.620	0.000	4167	537782	32	83	11782	2013/04/27 14:09:45	1	56	121	190	47	62	114	188
5297	122197	NK	2013/04/28 13:48:20	B	20.942	37.351	20.942	37.351	2	0	-128	93	3	0	401677503.070	0.000	18321	637640	526	62	6246	2013/04/28 13:47:34	1	56	118	189	48	62	110	199
5297	122197	SR							1	0	-139	0			401650000.000	0.000						2013/04/29 14:29:18	1	58	118	193	109	00	78	197
5297	122197	SR	2013/04/29 16:08:51	0	20.918	37.279	20.918	37.279	5	0	-131	236	3	50	401677529.030	0.000	1956	20806	183	98	1024	2013/04/29 16:09:51	1	56	120	195	37	72	102	196
5297	122197	NK	2013/04/30 12:57:37	B	20.942	37.285	20.942	37.285	1	0	-130	0	3	0	401677551.830	0.000	9978	12838	7755	100	6414	2013/04/30 12:57:38	1	56	117	190	48	60	110	194
5297	122197	MA	2013/05/01 05:48:23	1	21.007	37.231	21.007	37.231	5	0	-129	326	3	50	401677528.960	0.000	1026	3446	305	38	909	2013/05/01 05:52:43	1	56	117	188	47	60	110	194
5297	122197	NL	2013/05/01 06:20:23	3	21.017	37.231	21.017	37.231	8	0	-126	442	3	58	401677531.250	0.000	176	306	101	105	214	2013/05/01 06:24:21	1	57	118	189	47	58	110	196
5297	122197	MB	2013/05/01 06:41:07	B	21.013	37.231	21.013	37.231	2	0	-134	90	3	0	401677528.510	0.000	386	827	179	91	738	2013/05/01 06:40:22	1	57	117	189	48	59	110	199
5297	122197	MA	2013/05/01 07:28:38	3	21.015	37.233	21.015	37.233	4	1	-119	311	3	58	401677529.540	0.000	234	741	73	114	328	2013/05/01 07:29:25	1	57	117	191	44	61	110	199
5297	122197	NN	2013/05/01 12:07:55	1	20.967	37.221	20.967	37.221	5	0	-126	308	3	58	401677530.390	0.000	629	5234	75	80	799	2013/05/01 12:09:08	1	57	117	191	45	60	110	201
5297	122197	SR	2013/05/02 03:46:06	A	20.961	37.224	20.961	37.224	3	0	-134	130	3	0	401677530.190	0.000	1496	16438	136	65	2907	2013/05/02 03:46:20	1	58	119	191	44	62	110	191
5297	122197	NP	2013/05/02 10:23:37	0	20.976	37.203	20.976	37.203	4	0	-126	323	3	58	401677531.880	0.000	3831	83815	175	85	2734	2013/05/02 10:25:12	1	58	117	187	51	58	110	201
5297	122197	NN	2013/05/02 11:57:38	A	20.972	37.205	20.972	37.205	3	0	-128	200	3	8	401677534.970	0.000	870	6342	119	74	1226	2013/05/02 11:58:12	1	58	117	190	46	60	110	197
5297	122197	NP	2013/05/02 12:09:37	B	20.972	37.206	20.972	37.206	1	0	-133	0	3	0	401677529.450	0.000	509	1385	187	74	1391	2013/05/02 12:09:37	1	58	115	185	55	58	110	198
5297	122197	NN	2013/05/02 13:41:27	B	20.972	37.205	20.972	37.205	1	0	-134	0	3	8	401677535.580	0.000	820	1164	577	78	2286	2013/05/02 13:41:27	1	58	117	188	51	58	46	199
5297	122197	NK	2013/05/02 13:46:48	B	20.972	37.205	20.972	37.205	1	0	-136	0	3	0	401677531.230	0.000	831	1197	576	78	2317	2013/05/02 13:46:48	1	58	117	188	50	59	110	197
5297	122197	SR	2013/05/03 03:16:27	1	20.974	37.240	20.974	37.240	4	0	-126	239	3	50	401677530.240	0.000	531	8116	34	73	1056	2013/05/03 03:17:39	1	58	118	190	47	59	110	192
5297	122197	SR	2013/05/03 04:56:13	B	20.974	37.240	20.974	37.240	1	0	-136	0	3	8	401677526.280	0.000	798	1088	584	76	2190	2013/05/03 04:56:14	1	59	118	191	37	60	110	195
5297	122197	NL	2013/05/03 05:54:21	B	20.971	37.240	20.971	37.240	1	0	-133	0	3	8	401677535.690	0.000	900	1273	635	77	2525	2013/05/03 05:54:22	1	59	118	190	45	61	110	204
5297	122197	MA	2013/05/03 06:45:46	B	20.965	37.231	20.965	37.231	2	0	-124	214	3	8	401677531.540	0.000	664	7186	61	143	1848	2013/05/03 06:45:47	1	59	117	190	46	52	110	199
5297	122197	NK	2013/05/03 15:07:16	B	20.953	37.204	20.953	37.204	1	0	-134	0	3	8	401677542.420	0.000	1458	1894	1122	90	4105	2013/05/03 15:07:17	1	59	117	189	48	62	110	201
5297	122197	NP	2013/05/04 11:50:13	B	20.988	37.245	20.988	37.245	2	0	-135	260	3	0	401677533.780	0.000	1832	41041	81	124	5170	2013/05/04 11:45:53	1	28	112	189	53	61	106	216
5297	122197	NK	2013/05/04 13:00:56	B	20.991	37.237	20.991	37.237	1	0	-136	0	3	8	401677530.620	0.000	1961	9347	411	124	5535	2013/05/04 13:00:57	1	60	121	187	55	61	114	209
5297	122197	NK	2013/05/05 03:07:55	B	21.024	37.241	21.024	37.241	1	0	-128	0	3	0	401677509.710	0.000	2501	6244	1001	115	7067	2013/05/05 03:07:55	1	60	123	189	52	63	114	141
5297	122197	NK	2013/05/05 14:16:55	3	21.053	37.223	21.053	37.223	4	0	-130	372	3	68	401677528.310	0.000	185	308	110	78	340	2013/05/05 14:17:00	1	60	125	189	48	71	118	202
5297	122197	NK	2013/05/06 13:50:02	B	21.063	37.186	21.063	37.186	1	0	-136	0	3	0	401677511.510	0.000	2539	2783	2316	98	7172	2013/05/06 13:50:03	1	61	119	189	53	69	114	220
5297	122197	SR	2013/05/06 15:45:18	0	20.936	37.238	20.936	37.238	4	0	-129	144	3	58	401677527.060	0.000	2524	31727	200	105	1354	2013/05/06 15:45:38	1	61	120	188	52	59	114	215
5297	122197	MA	2013/05/06 18:36:56	B	20.899	37.244	20.899	37.244	1	0	-125	0	3	8	401677553.570	0.000	3412	5511	2112	88	2580	2013/05/06 18:36:56	1	61	122	191	45	66	114	212
5297	122197	SR							1			0			401650000.000	0.000						2013/05/07 15:18:03	1	62	121	191	49	64	114	214
5297	122197	NK	2013/05/09 03:12:06	B	21.010	37.242	21.010	37.242	2	0	-132	54	3	0	401677476.080	0.000	4582	42326	495	152	4890	2013/05/09 03:11:40	1	60	107	189	53	11	114	211
5297	122197	NK	2013/05/09 14:17:56	A	20.998	37.221	20.998	37.221	3	0	-129	227	3	8	401677521.010	0.000	634	8237	48	71	1749	2013/05/09 14:18:17	1	62	120	188	53	73	114	220
5297	122197	NN							1	0	-132	0			401650000.000	0.000						2013/05/11 12:00:21	1	63	122	189	52	74	114	217
5297	122197	SR							4			293			401650000.000	0.000						2013/05/12 15:57:19	1	63	120	188	55	73	110	220
5297	122197	NL							1	0	-130	0			401650000.000	0.000						2013/05/12 16:58:56	1	63	118	187	55	65	114	220
5297	122197	NL							1	0	-131	0			401650000.000	0.000						2013/05/12 18:44:43	1	63	120	192	17	63	114	213
5297	122197	MA	2013/05/14 06:21:08	A	20.918	37.268	20.918	37.268	3	0	-126	217	3	0	401677526.030	0.000	180	441	73	41	388	2013/05/14 06:21:09	1	63	122	189	53	70	114	210
5297	122197	NN	2013/05/14 13:08:05	2	20.931	37.234	20.931	37.234	4	0	-128	309	3	58	401677523.750	0.000	451	931	218	117	331	2013/05/14 13:09:10	2	64	122	189	52	68	114	213
5297	122197	SR	2013/05/14 14:55:47	A	20.933	37.229	20.933	37.229	3	0	-132	177	3	8	401677525.760	0.000	673	2402	188	34	1010	2013/05/14 14:56:17	1	64	122	188	53	70	114	213
5297	122197	NK	2013/05/14 15:41:34	B	20.929	37.228	20.929	37.228	1	0	-138	0	3	8	401677523.750	0.000	603	819	443	37	1655	2013/05/14 15:41:35	1	64	56	187	54	65	114	213
5297	122197	NL	2013/05/14 18:18:43	0	20.930	37.227	20.930	37.227	6	0	-126	375	3	58	401677525.970	0.000	1691	17940	159	82	1013	2013/05/14 18:19:24	1	64	121	188	52	63	114	212
5297	122197	MB	2013/05/14 18:26:14	B	20.929	37.226	20.929	37.226	2	0	-131	413	3	0	401677525.930	0.000	653	876	487	146	493	2013/05/14 18:22:48	1	64	121	188	52	62	114	212
5297	122197	SR	2013/05/15 03:42:08	B	20.936	37.227	20.936	37.227	1	0	-128	0	3	8	401677535.020	0.000	4960	6367	3863	100	4216	2013/05/15 03:42:08	1	64	120	189	54	65	114	209
5297	122197	MA	2013/05/15 05:58:27	2	20.961	37.231	20.961	37.231	4	0	-131	202	3	58	401677522.420	0.000	446	1249	158	17	1143	2013/05/15 06:01:50	2	64	120	188	53	65	114	209
5297	122197	NL	2013/05/15 06:51:36	2	20.970	37.234	20.970	37.234	5	0	-128	243	3	58	401677523.920	0.000	346	2159	55	107	498	2013/05/15 06:53:58	1	65	119	187	53	64	114	213
5297	122197	MB	2013/05/15 06:58:38	B	20.968	37.236	20.968	37.236	1	0	-136	0	3	0	401677523.420	0.000	310	463	206	117	810	2013/05/15 06:58:38	1	65	120	187	53	64	114	213
5297	122197	MA	2013/05/15 07:38:50	3	20.972	37.241	20.972	37.241	5	0	-120	309	3	58	401677524.040	0.000	180	347	93	130	237	2013/05/15 07:42:45	1	65	119	189	50	63	114	217
5297	122197	MA	2013/05/16 07:18:45	B	20.962	37.238	20.962	37.238	2	0	-126	155	3	0	401677526.290	0.000	2005	66192	60	114	4871	2013/05/16 07:18:46	1	65	121	188	53	66	114	211
5297	122197	NP	2013/05/16 09:35:57	B	20.962	37.238	20.962	37.238	1	0	-139	0	3	8	401677524.950	0.000	1873	5959	588	113	5085	2013/05/16 09:35:58	1	65	121	188	54	67	114	210
5297	122197	NN	2013/05/16 12:44:08	B	20.970	37.258	20.970	37.258	1	0	-134	0	3	8	401677519.150	0.000	1676	2738	1025	98	4725	2013/05/16 12:44:09	1	66	120	190	52	66	114	210
5297	122197	NN	2013/05/17 12:34:52	B	21.022	37.332	21.022	37.332	2	0	-130	102	3	0	401677549.100	0.000	2352	48234	114	84	6642	2013/05/17 12:34:01	1	66	122	186	54	68	114	204
5297	122197	NK	2013/05/17 14:23:58	B	21.022	37.280	21.022	37.280	1	0	-130	0	3	8	401677544.680	0.000	3888	31908	473	83	10992	2013/05/17 14:23:59	1	66	123	187	54	70	118	201
5297	122197	SR	2013/05/17 14:58:39	B	21.020	37.231	21.020	37.231	1	0	-131	0	3	8	401677524.080	0.000	3348	21024	533	82	9412	2013/05/17 14:58:40	1	70	123	185	56	72	118	201
5297	122197	SR	2013/05/19 15:38:49	B	20.985	37.213	20.985	37.213	2	0	-132	93	3	0	401677522.040	0.000	2937	172707	49	98	8298	2013/05/19 15:38:03	1	67	123	186	55	72	114	206
5297	122197	SR							1	0	-138	0			401650000.000	0.000						2013/05/24 03:55:24	1	68	120	187	55	71	242	198
5297	122197	NK							1	0	-136	0			401650000.000	0.000						2013/05/25 14:27:56	1	69	120	187	56	75	114	217
5297	122197	SR							1	0	-132	0			401650000.000	0.000						2013/05/25 15:49:13	1	69	120	186	55	73	114	217
5297	122197	NN	2013/05/31 13:17:41	A	20.944	37.169	20.944	37.169	3	0	-133	106	3	0	401677513.450	0.000	1470	24655	87	72	4140	2013/05/31 13:17:17	1	70	118	192	45	57	122	219
5297	122197	SR							1	0	-132	0			401650000.000	0.000						2013/06/02 16:35:48	1	71	119	188	52	66	114	213
5297	122197	SR	2013/06/03 16:06:00	B	20.924	37.242	20.924	37.242	2	0	-126	45	3	0	401677554.370	0.000	1087	9901	119	141	3046	2013/06/03 16:05:38	1	71	244	127	216	249	33	154
5297	122197	SR	2013/06/07 03:15:01	A	20.816	37.214	20.816	37.214	3	0	-127	170	3	0	401677523.230	0.000	935	32281	27	80	2592	2013/06/07 03:15:22	1	71	118	189	50	63	114	208
5297	122197	SR	2013/06/07 04:57:15	B	20.814	37.207	20.814	37.207	1	0	-136	0	3	8	401677516.540	0.000	1389	3996	482	80	3915	2013/06/07 04:57:15	1	71	116	188	50	62	114	215
5297	122197	NL	2013/06/07 05:31:57	1	20.802	37.229	20.802	37.229	4	0	-134	254	3	58	401677520.510	0.000	1488	5461	405	38	1052	2013/06/07 05:34:54	1	72	117	186	53	67	114	214
5297	122197	MA	2013/06/07 06:24:20	1	20.797	37.232	20.797	37.232	4	0	-126	290	3	58	401677519.450	0.000	642	1742	236	65	475	2013/06/07 06:25:43	1	72	117	185	53	68	114	214
5297	122197	NL	2013/06/07 07:12:18	B	20.802	37.243	20.802	37.243	1	0	-129	0	3	8	401677520.460	0.000	782	985	620	39	1615	2013/06/07 07:12:18	1	72	115	190	39	153	141	22
5297	122197	MA	2013/06/08 06:03:58	A	20.813	37.214	20.813	37.214	3	0	-131	140	3	0	401677517.910	0.000	749	2968	189	14	2093	2013/06/08 06:03:18	1	72	118	185	54	69	114	209
5297	122197	MA	2013/06/08 07:42:27	3	20.821	37.210	20.821	37.210	4	0	-125	261	3	58	401677522.370	0.000	178	204	154	144	261	2013/06/08 07:45:04	1	73	117	186	52	66	114	212
5297	122197	NL							1	0	-132	0			401650000.000	0.000						2013/06/11 17:38:02	1	73	118	188	49	63	114	209
5297	122197	MA							1	0	-127	0			401650000.000	0.000						2013/06/11 17:50:24	1	73	117	187	52	65	114	209
5297	122197	MB	2013/06/11 18:46:17	B	20.895	37.186	20.895	37.186	2	0	-127	47	3	0	401677522.570	0.000	3211	109412	94	73	9073	2013/06/11 18:45:54	1	73	118	184	52	65	114	209
5297	122197	NK	2013/06/12 13:48:23	B	20.896	37.251	20.896	37.251	1	0	-132	0	3	0	401677526.470	0.000	3641	8921	1485	80	10292	2013/06/12 13:48:23	1	74	117	191	47	67	114	212
5297	122197	SR	2013/06/12 14:40:11	B	20.905	37.222	20.905	37.222	1	0	-134	0	3	8	401677523.540	0.000	4265	17666	1029	86	12057	2013/06/12 14:40:12	1	74	116	189	116	65	114	212
5297	122197	MB	2013/06/12 18:21:25	B	20.912	37.231	20.912	37.231	1	0	-134	0	3	8	401677525.180	0.000	4309	16313	1138	85	12181	2013/06/12 18:21:25	1	74	117	189	50	64	114	210
5297	122197	NL	2013/06/12 19:04:39	B	20.913	37.258	20.913	37.258	1	0	-132	0	3	8	401677518.860	0.000	2656	5546	1271	79	7499	2013/06/12 19:04:40	1	74	118	187	51	64	114	210
5297	122197	MA	2013/06/12 19:11:01	B	20.911	37.266	20.911	37.266	2	0	-123	219	3	8	401677523.670	0.000	1848	67949	50	50	5209	2013/06/12 19:11:01	1	74	118	187	51	65	114	210
5297	122197	NP	2013/06/12 22:23:55	A	20.914	37.271	20.914	37.271	3	0	-134	176	3	8	401677521.570	0.000	530	2125	132	50	1295	2013/06/12 22:24:26	1	74	118	186	52	66	114	209
5297	122197	NN	2013/06/13 12:36:49	A	20.927	37.271	20.927	37.271	3	0	-128	308	3	0	401677518.010	0.000	545	5324	55	72	1495	2013/06/13 12:37:35	1	74	113	190	50	65	110	224
5297	122197	NK	2013/06/13 13:25:39	A	20.928	37.264	20.928	37.264	3	0	-128	236	3	8	401677517.370	0.000	348	1982	61	64	906	2013/06/13 13:25:40	1	74	113	187	53	66	110	225
5297	122197	NK	2013/06/13 15:08:39	B	20.931	37.270	20.931	37.270	1	0	-132	0	3	8	401677518.350	0.000	857	1076	682	73	2145	2013/06/13 15:08:40	1	75	113	170	52	66	110	221
5297	122197	SR	2013/06/13 15:50:35	B	20.926	37.271	20.926	37.271	2	0	-127	118	3	8	401677517.290	0.000	651	9565	44	98	1795	2013/06/13 15:49:37	1	75	116	187	51	65	110	217
5297	122197	NL	2013/06/13 17:15:14	B	20.927	37.267	20.927	37.267	1	0	-134	0	3	8	401677521.000	0.000	955	1967	463	96	2669	2013/06/13 17:15:15	1	75	116	186	53	67	114	216
5297	122197	SR	2013/06/14 15:21:32	A	20.927	37.264	20.927	37.264	3	0	-130	188	3	0	401677519.110	0.000	242	987	59	82	553	2013/06/14 15:21:23	1	75	118	186	54	71	114	213
5297	122197	MA	2013/06/14 18:25:26	A	20.918	37.276	20.918	37.276	3	0	-122	257	3	8	401677520.400	0.000	674	11540	39	83	1856	2013/06/14 18:25:51	1	75	117	186	52	66	114	211
5297	122197	MA							1	0	-128	0			401650000.000	0.000						2013/06/16 06:40:46	1	76	119	187	21	68	114	209
5297	122197	NK	2013/06/17 13:27:15	A	20.765	37.225	20.765	37.225	3	0	-128	137	3	0	401677518.250	0.000	919	7358	114	53	1796	2013/06/17 13:26:59	1	76	118	187	49	65	114	213
5297	122197	NN	2013/06/17 13:33:19	B	20.766	37.226	20.766	37.226	1	0	-138	0	3	0	401677518.260	0.000	1330	6584	268	53	2014	2013/06/17 13:33:20	1	76	118	188	48	65	114	213
5297	122197	NK	2013/06/17 15:10:16	B	20.761	37.231	20.761	37.231	2	0	-134	113	3	8	401677510.810	0.000	935	5164	169	50	2411	2013/06/17 15:09:20	1	76	118	185	52	68	114	212
5297	122197	SR	2013/06/17 15:28:46	B	20.750	37.218	20.750	37.218	2	0	-131	214	3	8	401677519.680	0.000	655	7646	56	108	1663	2013/06/17 15:27:00	1	77	120	187	47	67	114	213
5297	122197	NK	2013/06/18 13:04:01	A	20.756	37.212	20.756	37.212	3	0	-134	217	3	0	401677523.860	0.000	601	3362	107	52	1657	2013/06/18 13:02:03	1	77	116	186	51	67	114	216
5297	122197	NN	2013/06/18 13:21:23	A	20.771	37.227	20.771	37.227	3	0	-131	221	3	0	401677517.320	0.000	262	928	73	96	630	2013/06/18 13:19:28	1	77	117	187	50	67	110	217
5297	122197	NK	2013/06/18 14:40:26	A	20.762	37.202	20.762	37.202	3	0	-130	90	3	8	401677515.200	0.000	1652	12716	214	59	4657	2013/06/18 14:40:27	1	77	116	187	49	66	102	153
5297	122197	SR	2013/06/18 14:55:31	B	20.764	37.213	20.764	37.213	2	0	-135	47	3	8	401677515.250	0.000	1106	4026	304	55	3104	2013/06/18 14:55:08	1	77	117	186	50	68	114	197
5297	122197	MA							1	0	-129	0			401650000.000	0.000						2013/06/28 07:32:22	1	78	115	193	44	70	110	227
5297	122197	NL	2013/06/28 08:00:24	B	20.773	37.220	20.773	37.220	2	0	-131	230	3	0	401677515.320	0.000	2850	64510	125	159	8054	2013/06/28 07:58:29	1	78	114	190	47	62	110	227
5297	122197	SR	2013/06/30 15:17:39	3	20.741	37.219	20.741	37.219	9	0	-124	575	3	50	401677511.770	0.000	231	373	143	91	166	2013/06/30 15:21:11	1	78	114	190	46	61	110	229
5297	122197	SR							1	0	-138	0			401650000.000	0.000						2013/07/01 16:31:06	1	79	114	190	50	62	110	224
5297	122197	NK							1	0	-128	0			401650000.000	0.000						2013/07/02 02:56:57	1	79	112	188	55	59	110	225
5297	122197	NL	2013/07/02 05:30:53	1	20.944	37.200	20.944	37.200	7	0	-131	270	3	50	401677511.630	0.000	562	1662	190	34	847	2013/07/02 05:32:22	1	79	116	190	44	68	110	225
5297	122197	MA	2013/07/02 06:03:32	3	20.943	37.200	20.943	37.200	6	0	-125	446	3	58	401677511.420	0.000	217	365	128	11	351	2013/07/02 06:09:51	1	79	115	190	45	66	110	226
5297	122197	NP	2013/07/02 11:14:06	B	20.942	37.201	20.942	37.201	1	0	-128	0	3	8	401677506.650	0.000	1505	1670	1355	67	3313	2013/07/02 11:14:06	1	79	115	194	43	69	111	102
5297	122197	NN	2013/07/02 12:19:51	B	20.945	37.202	20.945	37.202	2	0	-136	99	3	8	401677513.840	0.000	1495	1647	1356	48	3680	2013/07/02 12:19:51	1	78	123	194	41	75	114	233
5297	122197	NK	2013/07/02 14:01:12	1	20.936	37.216	20.936	37.216	9	0	-126	674	3	58	401677511.380	0.000	817	5267	126	74	420	2013/07/02 14:05:53	1	79	121	190	46	62	114	232
5297	122197	NN	2013/07/02 14:09:55	1	20.936	37.210	20.936	37.210	4	0	-131	197	3	40	401677510.460	0.000	1347	1862	974	37	553	2013/07/02 14:09:11	1	207	121	189	48	63	114	232
5297	122197	SR	2013/07/02 14:14:53	1	20.919	37.213	20.919	37.213	6	0	-133	282	3	50	401677504.850	0.000	1323	4272	409	19	989	2013/07/02 14:16:34	1	79	120	188	49	62	114	236
5297	122197	MA	2013/07/03 05:46:40	A	20.949	37.206	20.949	37.206	3	0	-128	215	3	0	401677513.180	0.000	2002	8862	452	42	2088	2013/07/03 05:47:48	1	80	123	192	44	68	118	225
5297	122197	MB	2013/07/03 06:36:14	B	20.950	37.208	20.950	37.208	2	0	-133	177	3	8	401677511.410	0.000	468	2785	78	91	1281	2013/07/03 06:36:14	1	80	115	191	43	68	110	228
5297	122197	NL	2013/07/03 06:53:51	2	20.947	37.217	20.947	37.217	6	0	-124	665	3	50	401677512.680	0.000	254	1383	46	93	631	2013/07/03 07:03:25	1	80	114	192	42	70	110	229
5297	122197	MA	2013/07/03 07:25:14	3	20.949	37.199	20.949	37.199	7	0	-120	436	3	58	401677512.830	0.000	164	617	43	105	247	2013/07/03 07:30:32	1	80	118	193	33	168	09	29
5297	122197	MB	2013/07/03 08:23:22	B	20.949	37.191	20.949	37.191	1	0	-132	0	3	8	401677513.940	0.000	614	676	556	92	1489	2013/07/03 08:23:22	1	80	81	190	43	67	110	229
5297	122197	NP	2013/07/03 09:24:56	B	20.949	37.183	20.949	37.183	1	0	-137	0	3	8	401677510.110	0.000	824	1047	647	87	2209	2013/07/03 09:24:57	1	80	118	194
5297	122197	NP	2013/07/03 11:05:51	B	20.947	37.173	20.947	37.173	1	0	-129	0	3	8	401677507.890	0.000	1052	1737	637	85	2954	2013/07/03 11:05:52	1	80	113	191	47	62	110	229
5297	122197	NN	2013/07/03 12:16:09	B	20.956	37.196	20.956	37.196	2	0	-127	366	3	8	401677509.500	0.000	764	6754	86	136	2129	2013/07/03 12:13:07	1	80	116	192	41	73	106	233
5297	122197	SR	2013/07/04 04:06:39	A	20.822	37.226	20.822	37.226	3	0	-129	326	3	0	401677510.850	0.000	655	3608	118	143	1010	2013/07/04 04:05:24	1	81	120	189	47	74	110	223
5297	122197	NL	2013/07/04 05:07:52	B	20.821	37.225	20.821	37.225	1	0	-138	0	3	8	401677516.480	0.000	1571	2092	1179	136	1809	2013/07/04 05:07:53	1	81	113	187	50	60	110	231
5297	122197	NL	2013/07/04 06:47:37	1	20.818	37.205	20.818	37.205	11	0	-124	507	3	58	401677512.560	0.000	796	11134	56	102	999	2013/07/04 06:52:04	1	81	114	190	43	65	106	233
5297	122197	MA	2013/07/04 07:01:33	3	20.817	37.210	20.817	37.210	9	2	-118	539	3	50	401677513.330	0.000	191	978	37	103	298	2013/07/04 07:09:05	1	81	112	184	54	59	106	232
5297	122197	MA	2013/07/05 06:44:39	B	20.798	37.107	20.798	37.107	1	0	-124	0	3	0	401677508.460	0.000	2635	5794	1198	97	5748	2013/07/05 06:44:40	1	81	123	191	44	64	118	197
5297	122197	NN	2013/07/05 11:53:30	3	20.857	37.204	20.857	37.204	8	0	-128	605	3	58	401677509.910	0.000	204	244	170	109	206	2013/07/05 11:57:41	1	80	88	224	41	70	242	173
5297	122197	NP	2013/07/05 12:25:25	B	20.859	37.202	20.859	37.202	2	0	-134	48	3	8	401677509.550	0.000	719	731	707	46	1068	2013/07/05 12:25:01	1	82	104	192	41	69	114	237
5297	122197	NK	2013/07/05 12:47:00	B	20.858	37.203	20.858	37.203	2	0	-132	56	3	0	401677509.240	0.000	605	754	484	43	1281	2013/07/05 12:47:01	1	82	117	186	52	60	114	236
5297	122197	NN	2013/07/05 13:36:19	2	20.854	37.199	20.854	37.199	7	0	-129	651	3	58	401677511.440	0.000	252	347	182	128	230	2013/07/05 13:36:30	1	82	120	190	45	64	114	237
5297	122197	SR	2013/07/05 14:20:14	1	20.853	37.194	20.853	37.194	5	0	-130	258	3	58	401677509.490	0.000	1116	2112	589	10	779	2013/07/05 14:20:59	1	82	118	191	43	67	114	233
5297	122197	NK	2013/07/05 14:29:44	3	20.856	37.203	20.856	37.203	9	0	-124	562	3	58	401677511.600	0.000	220	375	129	48	219	2013/07/05 14:32:33	1	82	122	191	41	70	114	231
5297	122197	NK	2013/07/06 14:04:00	1	20.861	37.221	20.861	37.221	4	0	-125	152	3	50	401677510.890	0.000	976	27280	34	77	2731	2013/07/06 14:04:01	1	83	122	190	46	63	114	229
5297	122197	SR	2013/07/06 15:27:43	B	20.860	37.213	20.860	37.213	2	0	-128	70	3	8	401677505.720	0.000	548	3511	85	124	1497	2013/07/06 15:27:09	1	83	121	190	49	62	118	226
5297	122197	SR	2013/07/06 17:03:49	B	20.860	37.209	20.860	37.209	1	0	-134	0	3	8	401677514.510	0.000	844	1229	580	124	2351	2013/07/06 17:03:49	1	83	92	189
5297	122197	SR							1	0	-127	0			401650000.000	0.000						2013/07/08 16:02:22	1	83	121	190	50	61	118	225
5297	122197	NK	2013/07/10 14:05:47	1	20.843	37.225	20.843	37.225	11	0	-123	745	3	50	401677510.600	0.000	548	9233	32	77	498	2013/07/10 14:10:23	1	83	118	188	59	10	118	219
5297	122197	NN	2013/07/10 14:19:41	B	20.842	37.223	20.842	37.223	2	0	-132	44	3	0	401677510.620	0.000	849	1217	591	77	855	2013/07/10 14:19:20	1	83	120	187	50	58	114	231
5297	122197	SR	2013/07/10 15:03:02	3	20.850	37.217	20.850	37.217	9	0	-125	477	3	58	401677511.670	0.000	209	243	178	37	182	2013/07/10 15:05:50	1	83	121	192	41	67	114	229
5297	122197	SR	2013/07/10 16:41:46	B	20.851	37.213	20.851	37.213	1	0	-129	0	3	8	401677509.760	0.000	1474	1649	1317	98	1886	2013/07/10 16:41:47	1	83	120	188	51	59	114	228
5297	122197	NL	2013/07/10 16:47:54	B	20.851	37.215	20.851	37.215	1	0	-134	0	3	0	401677511.110	0.000	1419	1894	1063	99	1940	2013/07/10 16:47:55	1	83	120	190	48	59	114	228
5297	122197	NL	2013/07/11 05:23:34	B	20.906	37.185	20.906	37.185	1	0	-133	0	3	0	401677492.580	0.000	3620	4489	2918	108	5363	2013/07/11 05:23:35	1	83	121	191	48	60	118	226
5297	122197	MA	2013/07/11 06:16:50	A	20.939	37.215	20.939	37.215	3	0	-123	305	3	7	401677510.150	0.000	213	414	109	145	479	2013/07/11 06:19:32	1	83	121	189	48	58	118	226
5297	122197	NL	2013/07/11 06:57:02	3	20.935	37.221	20.935	37.221	6	0	-127	496	3	58	401677511.800	0.000	226	781	65	100	268	2013/07/11 07:03:33	1	84	122	192	41	67	118	227
5297	122197	NK	2013/07/14 03:03:18	0	20.728	37.208	20.728	37.208	5	0	-128	218	3	50	401677507.220	0.000	2772	32780	234	89	2032	2013/07/14 03:04:05	1	84	120	188	50	58	114	229
5297	122197	SR	2013/07/14 03:51:45	3	20.735	37.188	20.735	37.188	8	0	-123	488	3	58	401677508.550	0.000	153	195	119	131	196	2013/07/14 03:55:41	1	84	119	189	49	59	114	233
5297	122197	MA	2013/07/14 06:54:38	3	20.696	37.192	20.696	37.192	9	1	-118	518	3	58	401677508.200	0.000	196	458	84	101	178	2013/07/14 07:02:32	1	84	116	186	53	58	114	238
5297	122197	SR							1	0	-136	0			401650000.000	0.000						2013/07/17 03:54:21	1	84	119	195	45	63	114	231
5297	122197	NL							1	0	-136	0			401650000.000	0.000						2013/07/18 16:49:56	1	20	119	186
5297	122197	MA	2013/07/19 06:51:45	3	20.955	37.216	20.955	37.216	10	1	-118	518	3	50	401677509.090	0.000	163	340	77	105	91	2013/07/19 06:58:21	1	85	117	190	43	62	114	235
5297	122197	NL	2013/07/19 07:02:03	3	20.954	37.218	20.954	37.218	8	0	-125	462	3	50	401677508.690	0.000	209	648	67	112	216	2013/07/19 07:08:58	1	85	120	191	41	65	114	233
5297	122197	MA	2013/07/20 06:32:01	3	20.951	37.208	20.951	37.208	5	0	-121	349	3	50	401677508.130	0.000	199	263	150	129	250	2013/07/20 06:35:26	1	85	119	188	48	59	114	229
5297	122197	NL	2013/07/20 06:53:18	B	20.951	37.208	20.951	37.208	2	0	-131	0	3	0	401677508.250	0.000	494	545	447	99	915	2013/07/20 06:53:19	1	85	120	192	44	63	114	228
5297	122197	MB	2013/07/20 07:31:23	B	20.952	37.207	20.952	37.207	1	0	-129	0	3	8	401677510.990	0.000	695	752	642	95	1507	2013/07/20 07:31:23	1	86	119	189	45	61	114	236
5297	122197	MA	2013/07/20 08:16:49	B	20.952	37.206	20.952	37.206	1	0	-127	0	3	8	401677509.090	0.000	819	890	753	94	1994	2013/07/20 08:16:50	1	22	119	192	43	65	114	232
5297	122197	SR	2013/07/20 16:28:53	B	20.928	37.207	20.928	37.207	1	0	-130	0	3	8	401677533.580	0.000	1521	2054	1125	90	4282	2013/07/20 16:28:54	1	86	117	189	53	27	114	244
5297	122197	MA	2013/07/21 06:11:32	3	20.940	37.210	20.940	37.210	6	0	-127	400	3	50	401677509.740	0.000	194	223	169	5	326	2013/07/21 06:14:12	1	86	119	188	46	60	114	227
5297	122197	SR	2013/07/26 16:39:36	B	20.904	37.193	20.904	37.193	2	0	-131	51	3	0	401677512.380	0.000	1594	8428	301	165	4273	2013/07/26 16:39:11	1	86	116	189	51	59	114	230
5297	122197	NP							1	0	-138	0			401650000.000	0.000						2013/07/28 11:31:19	1	82	116	146	55	61	114	240
5297	122197	NN	2013/07/28 12:37:20	A	20.910	37.280	20.910	37.280	3	0	-128	296	3	0	401677504.650	0.000	1674	56292	49	78	3268	2013/07/28 12:36:15	1	86	116	187	51	59	114	237
5297	122197	NK	2013/07/28 15:07:01	1	20.909	37.272	20.909	37.272	5	0	-130	453	3	58	401677505.950	0.000	574	876	375	116	318	2013/07/28 15:08:47	2	87	117	187	48	58	114	236
5297	122197	SR							3			314			401650000.000	0.000						2013/07/28 15:37:36	1	87	126	191	41	64	122	233
5297	122197	SR							2			82			401650000.000	0.000						2013/07/29 16:44:58	1	87	118	186	51	62	114	233
5297	122197	NK	2013/07/30 03:12:11	B	20.967	37.238	20.967	37.238	2	0	-129	63	3	0	401677507.440	0.000	7695	63673	930	84	6213	2013/07/30 03:11:40	1	87	119	187	52	45	114	228
5297	122197	SR							6			329			401650000.000	0.000						2013/07/30 03:52:26	1	88	120	190	43	62	114	228
5297	122197	MA	2013/07/30 06:23:34	3	20.955	37.230	20.955	37.230	8	0	-125	465	3	58	401677505.510	0.000	138	152	125	123	207	2013/07/30 06:29:14	1	88	118	188	45	60	114	233
5297	122197	NL	2013/07/30 06:33:00	2	20.959	37.230	20.959	37.230	4	0	-126	186	3	50	401677507.870	0.000	466	1595	136	89	385	2013/07/30 06:33:29	1	88	118	188	45	60	114	235
5297	122197	MB	2013/07/30 07:20:30	B	20.958	37.231	20.958	37.231	2	0	-134	215	3	8	401677506.220	0.000	401	1405	114	130	1082	2013/07/30 07:20:30	1	88	117	152	45	59	178	236
5297	122197	MA	2013/07/30 08:07:40	B	20.957	37.232	20.957	37.232	2	0	-126	273	3	8	401677502.760	0.000	399	1643	96	13	1075	2013/07/30 08:05:24	1	88	115	187	47	50	118	251
5297	122197	SR							5			247			401650000.000	0.000						2013/07/31 03:20:28	1	89	119	185	51	58	114	229
5297	122197	MA	2013/07/31 06:07:15	1	20.960	37.231	20.960	37.231	4	0	-129	222	3	50	401677505.530	0.000	845	2585	276	48	959	2013/07/31 06:08:12	1	89	117	186	48	58	114	233
5297	122197	MB	2013/07/31 07:00:45	B	20.960	37.230	20.960	37.230	1	0	-134	0	3	8	401677502.730	0.000	1021	1360	766	61	1643	2013/07/31 07:00:45	1	81	117	187	14	60	122	233
5297	122197	MA							1	0	-121	0			401650000.000	0.000						2013/08/01 07:26:02	1	89	126	187	53	60	122	233
5297	122197	NP	2013/08/01 10:53:19	2	20.976	37.243	20.976	37.243	5	0	-129	365	3	50	401677506.180	0.000	405	5619	29	75	1085	2013/08/01 10:54:48	1	90	116	185	50	58	114	237
5297	122197	NN	2013/08/01 11:54:14	A	20.976	37.243	20.976	37.243	3	0	-131	148	3	8	401677507.410	0.000	339	898	127	21	882	2013/08/01 11:54:28	1	90	121	186	52	59	118	254
5297	122197	NK	2013/08/01 13:25:30	B	20.977	37.243	20.977	37.243	1	0	-134	0	3	8	401677507.310	0.000	736	811	667	31	2046	2013/08/01 13:25:30	1	90	115	186	45	93	98	170
5297	122197	NN	2013/08/01 13:37:07	B	20.977	37.243	20.977	37.243	1	0	-134	0	3	8	401677509.200	0.000	761	816	710	42	2119	2013/08/01 13:37:07	1	90	117	184	50	58	114	233
5297	122197	NK	2013/08/02 03:34:15	B	20.986	37.243	20.986	37.243	1	0	-132	0	3	0	401677505.490	0.000	1832	2675	1254	113	5174	2013/08/02 03:34:16	1	90	118	185	50	58	114	230
5297	122197	NL	2013/08/02 07:33:40	B	20.985	37.243	20.985	37.243	1	0	-131	0	3	8	401677508.350	0.000	2091	2851	1533	116	5906	2013/08/02 07:33:40	1	91	117	187	53	59	114	105
5297	122197	NP	2013/08/02 10:40:41	B	20.995	37.234	20.995	37.234	2	0	-128	96	3	8	401677504.290	0.000	1366	19693	94	85	3847	2013/08/02 10:39:54	1	91	117	186	50	60	114	235
5297	122197	NK	2013/08/02 13:03:40	B	20.997	37.232	20.997	37.232	1	0	-134	0	3	8	401677497.360	0.000	1582	4425	565	84	4459	2013/08/02 13:03:41	1	91	114	181	58	52	242	233
5297	122197	NN	2013/08/02 13:25:40	B	20.992	37.220	20.992	37.220	2	0	-131	322	3	0	401677502.070	0.000	868	11828	63	124	2423	2013/08/02 13:20:18	1	91	115	183	53	61	114	104
5297	122197	NK	2013/08/02 14:44:41	B	20.988	37.223	20.988	37.223	2	0	-131	285	3	8	401677505.550	0.000	659	9401	46	91	1822	2013/08/02 14:39:56	1	91	117	185	52	59	118	232
5297	122197	SR	2013/08/05 16:24:07	B	20.888	37.236	20.888	37.236	2	0	-131	293	3	0	401677521.190	0.000	2089	66132	66	49	5895	2013/08/05 16:21:41	1	211	117	156	52	61	114	111
5297	122197	SR	2013/08/08 16:31:01	B	20.901	37.185	20.901	37.185	2	0	-132	94	3	0	401677513.590	0.000	1641	19572	137	169	4590	2013/08/08 16:30:15	1	92	50	191	181	187	110	239
5297	122197	NN	2013/08/09 13:49:25	B	20.893	37.184	20.893	37.184	1	0	-136	0	3	0	401677513.940	0.000	2258	3161	1612	105	6374	2013/08/09 13:49:26	1	92	124	202	115	122	94	207
5297	122197	NK	2013/08/09 15:16:10	B	20.895	37.185	20.895	37.185	1	0	-133	0	3	8	401677514.940	0.000	2359	3185	1746	104	6660	2013/08/09 15:16:10	1	92	52	185	49	50	26	246
5297	122197	SR	2013/08/09 16:01:01	B	20.923	37.193	20.923	37.193	2	0	-131	111	3	8	401677506.260	0.000	1872	78307	44	104	5184	2013/08/09 16:00:06	1	92	118	188	45	60	122	234
5297	122197	NL	2013/08/10 06:00:27	B	20.968	37.194	20.968	37.194	1	0	-138	0	3	0	401677516.010	0.000	2372	4217	1334	116	6703	2013/08/10 06:00:28	1	92	117	183	53	59	114	230
5297	122197	MA	2013/08/10 06:00:27	B	20.942	37.200	20.942	37.200	1	0	-133	0	3	0	401677512.320	0.000	2868	3895	2110	160	8105	2013/08/10 06:00:28	1	92	117	183	53	59	122	102
5297	122197	MA	2013/08/10 07:43:48	B	20.946	37.201	20.946	37.201	1	0	-132	0	3	8	401677509.500	0.000	2744	3927	1916	147	7754	2013/08/10 07:43:49	1	92	118	185	50	59	114	231
5297	122197	NP	2013/08/10 10:53:25	B	20.935	37.203	20.935	37.203	1	0	-133	0	3	8	401677503.200	0.000	2477	2674	2294	118	6998	2013/08/10 10:53:25	1	93	116	185	50	58	114	234
5297	122197	NK	2013/08/10 13:05:43	B	20.942	37.205	20.942	37.205	1	0	-136	0	3	8	401677499.580	0.000	2524	2908	2189	125	7128	2013/08/10 13:05:43	1	93	117	184	51	58	114	235
5297	122197	SR	2013/08/11 04:13:35	B	20.949	37.226	20.949	37.226	1	0	-133	0	3	0	401677495.040	0.000	2697	4229	1719	73	7610	2013/08/11 04:13:35	1	92	53	150	165	161	246	137
5297	122197	MA	2013/08/11 07:19:42	B	20.933	37.209	20.933	37.209	1	0	-124	0	3	8	401677504.890	0.000	2315	10267	522	94	6541	2013/08/11 07:19:42	1	93	115	184	52	60	114	235
5297	122197	NK	2013/08/11 14:23:51	A	20.935	37.192	20.935	37.192	3	0	-131	157	3	8	401677504.810	0.000	599	7849	45	75	1648	2013/08/11 14:23:00	1	93	116	185	50	59	114	236
5297	122197	SR	2013/08/11 14:56:22	B	20.936	37.191	20.936	37.191	1	0	-133	0	3	8	401677503.830	0.000	713	1768	287	76	1977	2013/08/11 14:56:22	1	93	116	184	52	60	114	236
5297	122197	NK	2013/08/12 13:57:19	B	20.940	37.176	20.940	37.176	1	0	-136	0	3	0	401677502.720	0.000	2518	3069	2064	95	7111	2013/08/12 13:57:20	1	94	84	187	49	59	114	236
5297	122197	NL	2013/08/13 07:05:20	B	20.928	37.184	20.928	37.184	2	0	-134	53	3	0	401677507.150	0.000	2568	18840	350	90	7258	2013/08/13 07:04:54	1	95	115	181	56	59	114	233
5297	122197	NL							1	0	-133	0			401650000.000	0.000						2013/08/15 06:39:02	1	95	115	184	52	45	226	103
5297	122197	SR							1	0	-131	0			401650000.000	0.000						2013/08/15 16:09:44	1	96	116	183	51	61	114	233
5297	122197	NK	2013/08/18 14:51:30	B	20.912	37.203	20.912	37.203	2	0	-133	290	3	0	401677502.930	0.000	2988	162789	54	104	8442	2013/08/18 14:49:06	1	96	117	184	52	64	114	234
5297	122197	NK	2013/08/19 12:47:00	B	20.914	37.172	20.914	37.172	1	0	-136	0	3	0	401677495.880	0.000	3780	9298	1536	110	10685	2013/08/19 12:47:00	1	96	115	183	116	62	114	237
5297	122197	NN	2013/08/19 13:36:11	B	20.908	37.182	20.908	37.182	2	0	-132	45	3	8	401677493.180	0.000	1493	6493	343	172	4205	2013/08/19 13:35:49	1	97	115	184	55	54	114	235
5297	122197	NK	2013/08/19 14:28:54	3	20.894	37.191	20.894	37.191	4	0	-126	407	3	58	401677502.540	0.000	165	244	111	62	247	2013/08/19 14:30:57	1	97	115	182	53	65	114	236
5297	122197	NN	2013/08/21 13:13:34	B	20.691	37.293	20.691	37.293	2	0	-131	321	3	0	401677564.130	0.000	1815	38204	86	160	5119	2013/08/21 13:10:54	1	97	115	184	50	61	114	237
5297	122197	NK	2013/08/21 13:38:32	1	20.872	37.224	20.872	37.224	4	0	-131	174	3	50	401677498.420	0.000	610	2339	158	64	581	2013/08/21 13:38:56	1	97	115	184	57	126	86	237
5297	122197	NK	2013/08/21 15:20:32	B	20.862	37.230	20.862	37.230	1	0	-134	0	3	8	401677504.250	0.000	1460	1705	1250	77	2009	2013/08/21 15:20:32	1	98	244	240	154	194	171	01
5297	122197	SR	2013/08/21 16:22:28	B	20.869	37.217	20.869	37.217	2	0	-132	66	3	8	401677504.040	0.000	970	3592	261	172	1613	2013/08/21 16:21:55	1	98	117	184	49	61	114	233
5297	122197	NK	2013/08/22 13:12:50	B	20.776	37.266	20.776	37.266	1	0	-136	0	3	0	401677531.080	0.000	2262	2909	1758	104	6387	2013/08/22 13:12:51	1	98	114	184	54	65	114	234
5297	122197	NK	2013/08/22 14:57:08	B	20.874	37.219	20.874	37.219	1	0	-133	0	3	0	401677505.680	0.000	2156	3507	1324	97	6085	2013/08/22 14:57:08	1	98	117	184	49	59	114	107
5297	122197	MA							1	0	-133	0			401650000.000	0.000						2013/08/24 06:08:24	1	98	117	185
5297	122197	SR							1	0	-136	0			401650000.000	0.000						2013/08/24 14:50:52	1	98	117	183	50	63	114	232
5297	122197	SR	2013/08/25 03:34:53	B	20.899	37.203	20.899	37.203	2	0	-127	133	3	0	401677503.970	0.000	2834	177148	45	63	8000	2013/08/25 03:33:47	1	99	118	182	53	73	206	136
5297	122197	MA	2013/08/25 05:51:40	B	20.896	37.212	20.896	37.212	1	0	-134	0	3	8	401677500.110	0.000	1522	4004	578	67	4294	2013/08/25 05:51:41	1	99	118	181	59	193	114	231
5297	122197	NL	2013/08/25 06:14:03	A	20.898	37.207	20.898	37.207	3	0	-130	115	3	0	401677499.820	0.000	694	5060	95	106	1936	2013/08/25 06:14:01	1	99	118	182	50	64	114	229
5297	122197	MA	2013/08/25 07:29:20	B	20.898	37.206	20.898	37.206	2	0	-123	46	3	8	401677500.220	0.000	483	1252	186	56	1325	2013/08/25 07:29:21	1	99	118	182	52	67	114	229
5297	122197	NL	2013/08/26 06:05:37	2	20.929	37.199	20.929	37.199	4	0	-131	278	3	50	401677503.480	0.000	401	1671	96	82	736	2013/08/26 06:07:09	1	100	120	184	48	64	114	229
5297	122197	MA	2013/08/26 07:11:10	3	20.928	37.196	20.928	37.196	5	0	-121	411	3	68	401677501.130	0.000	228	1601	32	99	548	2013/08/26 07:11:10	1	100	119	181	48	67	114	225
5297	122197	NL	2013/08/26 07:41:19	A	20.929	37.198	20.929	37.198	3	0	-133	249	3	8	401677502.110	0.000	223	532	93	64	532	2013/08/26 07:44:11	1	100	119	184	47	68	114	165
5297	122197	NP	2013/08/26 09:41:32	B	20.930	37.201	20.930	37.201	1	0	-136	0	3	8	401677499.990	0.000	776	865	696	84	2166	2013/08/26 09:41:33	1	100	118	182	51	68	114	229
5297	122197	NK	2013/08/26 13:18:24	B	20.932	37.193	20.932	37.193	2	0	-131	127	3	8	401677499.030	0.000	873	5799	131	26	2438	2013/08/26 13:16:18	1	100	119	185	49	68	114	229
5297	122197	NN	2013/08/26 13:58:31	B	20.934	37.194	20.934	37.194	1	0	-134	0	3	8	401677495.670	0.000	986	2639	368	27	2761	2013/08/26 13:58:31	1	100	118	183	52	68	114	231
5297	122197	NK	2013/08/26 14:59:26	A	20.919	37.181	20.919	37.181	3	0	-128	313	3	8	401677498.700	0.000	242	676	86	139	554	2013/08/26 14:55:45	1	100	108	184	48	70	114	230
5297	122197	SR	2013/08/26 15:24:26	0	20.914	37.183	20.914	37.183	5	0	-127	386	3	50	401677502.410	0.000	2016	3199	1270	127	213	2013/08/26 15:26:27	1	100	119	181	53	70	114	229
5297	122197	SR	2013/08/27 04:11:39	B	20.899	37.222	20.899	37.222	2	0	-132	71	3	0	401677500.020	0.000	3202	17191	596	27	2968	2013/08/27 04:11:04	1	100	119	183	49	69	114	228
5297	122197	NL	2013/08/27 05:53:21	A	20.900	37.213	20.900	37.213	3	0	-134	147	3	8	401677501.510	0.000	1135	4710	273	68	1530	2013/08/27 05:53:05	1	101	119	180	52	70	114	229
5297	122197	NN	2013/08/27 13:47:53	B	20.910	37.207	20.910	37.207	1	0	-132	0	3	8	401677510.360	0.000	4274	6010	3039	85	4136	2013/08/27 13:47:54	1	101	119	183	49	68	114	232
5297	122197	NK	2013/08/27 14:34:14	2	20.920	37.194	20.920	37.194	5	0	-130	472	3	58	401677502.860	0.000	474	831	270	58	264	2013/08/27 14:36:17	2	101	119	181	51	69	114	231
5297	122197	SR	2013/08/27 14:55:43	B	20.927	37.195	20.927	37.195	2	0	-133	306	3	0	401677501.070	0.000	593	4594	76	53	1537	2013/08/27 14:53:11	1	101	119	182	51	69	114	229
5297	122197	SR	2013/08/28 03:36:32	B	20.883	37.218	20.883	37.218	2	0	-130	57	3	0	401677500.420	0.000	2075	11235	383	59	3887	2013/08/28 03:36:04	1	101	119	182	52	69	114	228
5297	122197	NL	2013/08/28 05:39:51	B	20.896	37.236	20.896	37.236	2	0	-134	88	3	8	401677508.920	0.000	1409	4338	457	28	2545	2013/08/28 05:39:08	1	101	119	182	52	70	114	228
5297	122197	SR	2013/08/28 16:03:09	B	20.907	37.219	20.907	37.219	2	0	-127	118	3	8	401677491.970	0.000	1211	27517	53	123	3250	2013/08/28 16:02:11	1	102	119	184	52	70	114	230
5297	122197	NK							1	0	-133	0			401650000.000	0.000						2013/08/30 03:50:26	1	102	120	182	52	73	114	228
5297	122197	NL							1	0	-136	0			401650000.000	0.000						2013/08/30 07:01:31	1	102	120	183	53	73	114	230
5297	122197	NN	2013/08/30 13:10:30	B	20.898	37.217	20.898	37.217	2	0	-131	176	3	0	401677501.930	0.000	2459	63975	94	61	6946	2013/08/30 13:09:03	1	102	120	183
5297	122197	NK	2013/08/30 13:17:16	B	20.896	37.235	20.896	37.235	2	0	-134	222	3	0	401677497.440	0.000	2500	73427	85	74	7061	2013/08/30 13:19:08	2	102	119	181	53	73	114	232
5297	122197	NK	2013/08/31 03:26:16	B	20.890	37.230	20.890	37.230	1	0	-134	0	3	0	401677501.300	0.000	2393	5646	1014	99	6764	2013/08/31 03:26:16	1	102	120	183	53	73	114	229
5297	122197	SR	2013/08/31 03:46:32	B	20.892	37.225	20.892	37.225	2	0	-128	68	3	0	401677499.350	0.000	899	9307	86	65	2487	2013/08/31 03:45:58	1	102	120	182	52	73	114	229
5297	122197	NN	2013/08/31 13:01:02	B	20.923	37.212	20.923	37.212	2	0	-130	52	3	8	401677502.490	0.000	1330	14632	120	74	3742	2013/08/31 13:00:36	1	102	119	184	53	74	114	236
5297	122197	NK	2013/08/31 14:32:30	B	20.927	37.212	20.927	37.212	1	0	-130	0	3	8	401677501.920	0.000	1484	4603	478	74	4179	2013/08/31 14:32:31	1	103	119	182	52	73	114	234
5297	122197	SR	2013/08/31 16:09:18	B	20.915	37.193	20.915	37.193	2	0	-128	47	3	8	401677505.240	0.000	883	6976	111	110	2402	2013/08/31 16:08:55	1	103	120	182	54	74	114	227
5297	122197	MA	2013/09/01 08:27:08	B	20.915	37.124	20.915	37.124	1	0	-132	0	3	0	401677500.950	0.000	2170	3051	1543	99	6129	2013/09/01 08:27:09	1	103	104	182	54	75	114	231
5297	122197	NN	2013/09/01 12:53:15	B	20.915	37.137	20.915	37.137	1	0	-130	0	3	8	401677499.630	0.000	3742	17364	806	83	10579	2013/09/01 12:53:15	1	103	119	183	54	74	114	233
5297	122197	MA	2013/09/02 08:03:18	B	20.928	37.174	20.928	37.174	1	0	-125	0	3	0	401677494.010	0.000	3384	9625	1189	101	9566	2013/09/02 08:03:18	1	103	121	181	53	03	24	100
5297	122197	NN	2013/09/02 12:39:05	B	20.927	37.173	20.927	37.173	2	0	-130	194	3	8	401677502.130	0.000	1592	73144	34	72	4486	2013/09/02 12:37:29	1	103	121	184	50	74	114	229
5297	122197	NK	2013/09/02 13:45:18	A	20.925	37.180	20.925	37.180	3	0	-130	383	3	8	401677502.830	0.000	235	612	90	18	539	2013/09/02 13:44:13	1	103	120	188	103	107	163	209
5297	122197	SR	2013/09/02 15:07:27	B	20.930	37.179	20.930	37.179	2	0	-131	223	3	8	401677498.390	0.000	473	3518	63	75	1276	2013/09/02 15:09:19	2	103	121	181	52	75	114	228
5297	122197	SR	2013/09/03 03:48:35	B	20.933	37.182	20.933	37.182	1	0	-138	0	3	0	401677495.700	0.000	1823	2260	1469	61	5128	2013/09/03 03:48:35	1	103	121	182	52	74	114	226
5297	122197	NP							1	0	-134	0			401650000.000	0.000						2013/09/04 11:33:29	1	104	121	184	51	75	114	230
5297	122197	NN	2013/09/04 12:16:21	A	20.905	37.196	20.905	37.196	3	0	-130	357	3	0	401677502.110	0.000	227	773	66	39	520	2013/09/04 12:15:48	1	104	121	181	21	42	82	165
5297	122197	NK	2013/09/04 14:38:27	A	20.912	37.205	20.912	37.205	3	0	-127	321	3	8	401677502.040	0.000	321	2484	41	100	817	2013/09/04 14:34:38	1	104	120	181	52	73	114	229
5297	122197	NL	2013/09/05 05:43:12	B	20.936	37.199	20.936	37.199	2	0	-133	274	3	0	401677503.770	0.000	1285	14349	115	30	3621	2013/09/05 05:40:55	1	104	120	182	52	74	114	227
5297	122197	MA	2013/09/05 07:07:43	B	20.931	37.197	20.931	37.197	1	0	-129	0	3	8	401677501.870	0.000	1498	4488	500	30	4225	2013/09/05 07:07:43	1	104	120	183	53	74	114	228
5297	122197	NP	2013/09/05 11:15:28	A	20.915	37.204	20.915	37.204	3	0	-133	163	3	8	401677498.430	0.000	978	10532	90	64	2741	2013/09/05 11:15:06	1	104	124	185	49	75	114	231
5297	122197	NK	2013/09/05 14:13:03	B	20.928	37.210	20.928	37.210	2	0	-131	226	3	8	401677500.320	0.000	1100	38567	31	77	3086	2013/09/05 14:09:18	1	104	122	184	52	74	98	129
5297	122197	SR	2013/09/05 15:09:33	B	20.920	37.185	20.920	37.185	2	0	-130	71	3	8	401677497.920	0.000	661	3389	129	103	1826	2013/09/05 15:08:58	1	104	121	191	51	75	114	231
5297	122197	SR	2013/09/06 03:56:58	B	20.914	37.199	20.914	37.199	2	0	-132	195	3	0	401677511.070	0.000	1174	15935	86	179	2950	2013/09/06 03:55:21	1	104	121	181	52	74	114	226
5297	122197	NN	2013/09/06 13:38:09	A	20.901	37.171	20.901	37.171	3	0	-130	108	3	8	401677511.710	0.000	761	4577	126	49	2117	2013/09/06 13:38:15	1	104	121	182	51	74	114	229
5297	122197	SR	2013/09/07 03:24:09	B	20.901	37.178	20.901	37.178	1	0	-132	0	3	0	401677505.550	0.000	1994	3235	1228	60	5630	2013/09/07 03:24:09	1	105	120	182	52	73	114	227
5297	122197	MA	2013/09/07 06:24:28	B	20.910	37.177	20.910	37.177	1	0	-131	0	3	8	401677492.320	0.000	2559	6537	1002	83	7233	2013/09/07 06:24:29	1	105	121	183	52	75	114	229
5297	122197	SR	2013/09/07 15:47:21	B	20.912	37.170	20.912	37.170	2	0	-129	53	3	8	401677497.090	0.000	2141	69422	66	102	6043	2013/09/07 15:46:55	1	105	122	184	51	75	114	228
5297	122197	SR	2013/09/08 04:34:36	B	20.925	37.163	20.925	37.163	1	0	-137	0	3	0	401677503.210	0.000	2733	6627	1126	97	7711	2013/09/08 04:34:37	1	105	121	149	53	202	240	226
5297	122197	MA	2013/09/08 05:59:23	2	20.931	37.206	20.931	37.206	5	0	-131	312	3	58	401677500.510	0.000	268	674	106	34	684	2013/09/08 06:02:54	1	105	121	179	52	74	114	229
5297	122197	MB	2013/09/08 06:57:26	B	20.931	37.206	20.931	37.206	1	0	-133	0	3	8	401677500.670	0.000	586	657	521	47	1623	2013/09/08 06:57:26	1	105	120	180	51	73	114	230
5297	122197	MA	2013/09/08 07:37:23	3	20.924	37.212	20.924	37.212	4	0	-125	393	3	58	401677499.770	0.000	166	219	125	67	249	2013/09/08 07:41:27	1	105	120	179	52	74	114	228
5297	122197	NN	2013/09/08 13:14:11	B	20.902	37.231	20.902	37.231	2	0	-128	206	3	8	401677495.630	0.000	806	8234	78	151	2247	2013/09/08 13:12:29	1	106	120	183	50	74	114	229
5297	122197	MA	2013/09/09 05:40:16	B	20.918	37.195	20.918	37.195	2	0	-133	176	3	0	401677497.020	0.000	1347	7922	229	27	3796	2013/09/09 05:38:49	1	106	119	185	37	59	242	225
5297	122197	MB	2013/09/09 06:31:22	B	20.923	37.203	20.923	37.203	2	0	-133	57	3	0	401677499.030	0.000	415	541	317	104	250	2013/09/09 06:31:23	1	106	116	179	52	57	114	227
5297	122197	NL	2013/09/09 06:30:32	2	20.925	37.203	20.925	37.203	11	0	-126	625	3	58	401677499.210	0.000	274	473	158	97	155	2013/09/09 06:40:14	1	106	119	186	45	81	114	227
5297	122197	MA	2013/09/09 07:18:42	2	20.920	37.214	20.920	37.214	5	1	-117	414	3	58	401677500.130	0.000	382	3120	46	104	555	2013/09/09 07:25:37	2	106	117	182	48	59	114	228
5297	122197	NL	2013/09/09 08:16:04	B	20.920	37.220	20.920	37.220	1	0	-130	0	3	8	401677501.270	0.000	844	1030	691	99	1562	2013/09/09 08:16:04	1	106	117	181	49	57	114	227
5297	122197	MB	2013/09/09 08:16:04	B	20.916	37.210	20.916	37.210	1	0	-132	0	3	0	401677499.150	0.000	922	1430	594	86	1975	2013/09/09 08:16:04	1	106	117	181	49	57	114	227
5297	122197	NP	2013/09/09 10:29:10	B	20.918	37.225	20.918	37.225	2	0	-132	44	3	8	401677497.680	0.000	1531	2200	1064	97	2775	2013/09/09 10:28:48	1	106	115	180	50	58	114	228
5297	122197	NK	2013/09/09 14:15:20	B	20.912	37.214	20.912	37.214	2	0	-125	77	3	8	401677507.840	0.000	1739	18103	167	92	3145	2013/09/09 14:14:42	1	107	118	185	45	61	114	227
5297	122197	SR	2013/09/10 03:29:53	2	20.925	37.204	20.925	37.204	5	0	-124	496	3	50	401677499.360	0.000	457	2593	80	79	361	2013/09/10 03:31:40	1	107	117	182	48	60	114	225
5297	122197	SR	2013/09/10 14:13:11	B	20.918	37.242	20.918	37.242	1	0	-136	0	3	8	401677500.440	0.000	4414	5317	3664	85	4676	2013/09/10 14:13:12	1	107	115	181	52	59	242	229
5297	122197	NL	2013/09/11 06:08:49	B	20.936	37.221	20.936	37.221	1	0	-128	0	3	0	401677494.810	0.000	6689	13387	3341	90	8184	2013/09/11 06:08:49	1	107	118	184	49	60	114	225
5297	122197	NK	2013/09/11 13:23:06	B	20.928	37.267	20.928	37.267	1	0	-131	0	3	8	401677485.300	0.000	7871	26112	2372	93	10766	2013/09/11 13:23:06	1	107	118	184	46	61	114	227
5297	122197	NK	2013/09/11 15:09:58	A	20.908	37.185	20.908	37.185	3	0	-128	321	3	8	401677500.550	0.000	291	569	149	2	511	2013/09/11 15:08:06	1	107	116	183	47	60	114	226
5297	122197	SR	2013/09/11 15:24:52	1	20.910	37.187	20.910	37.187	4	0	-129	565	3	40	401677497.460	0.000	667	1455	306	119	304	2013/09/11 15:27:30	1	107	117	182	48	60	114	226
5297	122197	NL	2013/09/12 05:58:09	3	20.904	37.215	20.904	37.215	8	0	-128	448	3	50	401677496.900	0.000	206	338	125	57	268	2013/09/12 06:01:53	1	107	117	179	51	60	114	224
5297	122197	MA	2013/09/12 06:13:57	2	20.909	37.216	20.909	37.216	9	0	-123	527	3	50	401677498.860	0.000	261	278	244	163	211	2013/09/12 06:19:54	1	108	116	179	51	61	114	227
5297	122197	MB	2013/09/12 07:10:22	1	20.910	37.219	20.910	37.219	4	0	-126	133	3	58	401677497.000	0.000	530	5059	55	104	938	2013/09/12 07:10:45	1	108	116	179	50	59	114	229
5297	122197	MA	2013/09/12 07:57:33	2	20.912	37.224	20.912	37.224	4	0	-123	224	3	58	401677498.950	0.000	328	638	168	146	425	2013/09/12 07:58:26	1	108	117	182	46	60	114	227
5297	122197	NP	2013/09/12 09:59:01	2	20.909	37.207	20.909	37.207	7	0	-131	515	3	58	401677499.130	0.000	261	269	251	148	301	2013/09/12 10:02:26	1	108	244	178	52	62	114	230
5297	122197	NN	2013/09/12 12:24:13	B	20.911	37.205	20.911	37.205	1	0	-136	0	3	8	401677497.700	0.000	2453	2624	2293	89	2346	2013/09/12 12:24:14	1	108	116	179	52	59	112	99
5297	122197	NN	2013/09/12 14:12:03	B	20.912	37.205	20.912	37.205	1	0	-136	0	3	8	401677504.200	0.000	2882	3231	2570	90	3020	2013/09/12 14:12:04	1	108	119	182	47	63	114	225
5297	122197	NK	2013/09/12 14:42:09	1	20.923	37.188	20.923	37.188	5	0	-128	649	3	48	401677498.580	0.000	708	1820	275	81	271	2013/09/12 14:42:10	1	108	117	181	48	62	114	226
5297	122197	SR	2013/09/12 14:49:54	B	20.921	37.177	20.921	37.177	2	0	-129	51	3	0	401677500.070	0.000	585	1558	219	76	1050	2013/09/12 14:49:29	1	108	118	181	47	62	114	226
5297	122197	NL	2013/09/13 05:46:22	2	20.914	37.209	20.914	37.209	6	0	-130	275	3	50	401677497.240	0.000	462	1242	172	37	695	2013/09/13 05:47:40	1	108	116	180	49	61	114	229
5297	122197	MA	2013/09/13 05:55:08	2	20.916	37.213	20.916	37.213	7	0	-128	310	3	50	401677498.790	0.000	408	809	205	22	506	2013/09/13 05:58:47	1	109	119	181	46	62	114	225
5297	122197	MB	2013/09/13 06:47:21	B	20.922	37.209	20.922	37.209	2	0	-133	399	3	8	401677499.440	0.000	712	2820	179	3	1111	2013/09/13 06:47:21	1	109	118	182	46	63	114	227
5297	122197	NL	2013/09/13 07:25:39	A	20.918	37.219	20.918	37.219	3	0	-125	343	3	8	401677498.810	0.000	158	185	133	120	282	2013/09/13 07:27:07	1	109	118	181	47	59	114	225
5297	122197	MA	2013/09/13 07:37:53	B	20.919	37.219	20.919	37.219	2	0	-128	44	3	0	401677502.220	0.000	247	423	143	121	609	2013/09/13 07:37:31	1	109	117	180	49	62	114	227
5297	122197	NP	2013/09/13 09:48:54	A	20.916	37.223	20.916	37.223	3	0	-134	396	3	8	401677499.350	0.000	249	541	114	150	607	2013/09/13 09:53:30	1	109	116	178	60	62	114	227
5297	122197	NL	2013/09/14 05:36:11	B	20.936	37.262	20.936	37.262	2	0	-136	119	3	0	401677508.030	0.000	1558	9619	252	78	4396	2013/09/14 05:35:12	1	109	119	182	49	62	114	225
5297	122197	MA	2013/09/14 05:37:11	B	20.932	37.243	20.932	37.243	1	0	-133	0	3	0	401677504.620	0.000	2436	23102	256	77	6882	2013/09/14 05:37:11	1	109	119	181	49	63	114	224
5297	122197	MB	2013/09/14 06:28:12	B	20.934	37.246	20.934	37.246	1	0	-136	0	3	8	401677506.010	0.000	2205	11721	414	76	6230	2013/09/14 06:28:12	1	109	118	148	50	63	114	225
5297	122197	MA	2013/09/14 08:56:35	B	20.938	37.251	20.938	37.251	1	0	-133	0	3	8	401677505.860	0.000	2161	6399	729	77	6102	2013/09/14 08:56:35	1	109	116	180	50	62	114	231
5297	122197	NP	2013/09/14 09:41:00	A	20.936	37.223	20.936	37.223	3	0	-134	153	3	8	401677486.430	0.000	1502	4725	477	143	1730	2013/09/14 09:40:47	1	110	117	179	51	64	114	230
5297	122197	NP	2013/09/14 11:21:14	A	20.925	37.242	20.925	37.242	3	0	-125	146	3	8	401677494.850	0.000	275	405	186	169	448	2013/09/14 11:21:27	1	110	117	179	51	63	114	233
5297	122197	NN	2013/09/14 12:07:04	3	20.920	37.244	20.920	37.244	6	0	-130	498	3	58	401677497.400	0.000	229	251	208	75	219	2013/09/14 12:09:32	1	110	54	182	46	195	119	233
5297	122197	NK	2013/09/14 13:56:42	B	20.915	37.241	20.915	37.241	1	0	-128	0	3	8	401677497.480	0.000	1499	1604	1399	85	2033	2013/09/14 13:56:42	1	110	116	182	48	62	114	231
5297	122197	NK	2013/09/15 13:27:31	A	20.907	37.214	20.907	37.214	3	0	-128	190	3	0	401677503.210	0.000	793	7220	87	81	2210	2013/09/15 13:27:31	1	110	115	178	53	66	114	235
5297	122197	NN	2013/09/15 13:38:13	B	20.907	37.217	20.907	37.217	1	0	-131	0	3	0	401677504.210	0.000	880	4390	176	81	2458	2013/09/15 13:38:13	1	110	116	179	53	65	114	235
5297	122197	SR	2013/09/15 14:54:07	B	20.919	37.227	20.919	37.227	2	0	-129	102	3	8	401677499.070	0.000	909	5017	164	92	2538	2013/09/15 14:53:17	1	111	117	180	51	64	114	233
5297	122197	NK	2013/09/15 15:08:44	B	20.919	37.228	20.919	37.228	1	0	-130	0	3	0	401677494.810	0.000	1117	4172	299	91	2536	2013/09/15 15:08:44	1	111	117	181	50	64	114	231
5297	122197	SR	2013/09/16 03:40:45	3	20.937	37.209	20.937	37.209	4	0	-128	337	3	50	401677497.790	0.000	223	684	72	90	289	2013/09/16 03:41:50	1	111	119	180	51	64	114	224
5297	122197	NK	2013/09/16 13:02:24	B	20.942	37.212	20.942	37.212	1	0	-130	0	3	8	401677484.730	0.000	1550	1852	1297	95	4369	2013/09/16 13:02:24	1	111	116	181	50	64	110	235
5297	122197	NN	2013/09/16 13:26:48	B	20.933	37.210	20.933	37.210	1	0	-130	0	3	0	401677481.550	0.000	1607	1911	1350	82	4529	2013/09/16 13:26:49	1	111	115	179	52	65	114	233
5297	122197	SR	2013/09/16 14:27:55	A	20.913	37.249	20.913	37.249	3	0	-136	230	3	7	401677497.400	0.000	1153	5278	251	49	1751	2013/09/16 14:28:28	1	111	116	180	49	64	114	233
5297	122197	NK	2013/09/16 14:43:05	3	20.908	37.241	20.908	37.241	6	0	-126	315	3	50	401677500.030	0.000	212	418	107	118	246	2013/09/16 14:45:54	2	112	117	179	50	64	114	232
5297	122197	SR	2013/09/17 04:50:25	B	20.871	37.401	20.871	37.401	1	0	-136	0	3	0	401677539.170	0.000	2922	3663	2329	82	5243	2013/09/17 04:50:25	1	112	117	179	51	65	114	228
5297	122197	NL	2013/09/17 06:38:18	B	20.935	37.234	20.935	37.234	2	0	-131	134	3	8	401677507.870	0.000	2606	98342	69	81	5486	2013/09/17 06:37:11	1	112	246	177
5297	122197	NN	2013/09/17 13:10:29	B	20.975	37.096	20.975	37.096	1	0	-134	0	3	8	401677468.280	0.000	2288	5317	984	82	6460	2013/09/17 13:10:29	1	112	118	181	171	69	122	79
5297	122197	NL	2013/09/18 06:24:47	B	20.944	37.157	20.944	37.157	1	0	-134	0	3	0	401677484.470	0.000	4387	21583	891	89	12406	2013/09/18 06:24:47	1	112	119	183	47	63	114	226
5297	122197	NN	2013/09/18 13:05:02	A	20.916	37.216	20.916	37.216	3	0	-131	428	3	8	401677499.510	0.000	797	10036	63	99	2220	2013/09/18 12:59:17	1	112	119	183	109	63	50	229
5297	122197	NK	2013/09/18 13:58:46	B	20.952	37.111	20.952	37.111	1	0	-129	0	3	8	401677475.930	0.000	5678	31379	1027	100	14472	2013/09/18 13:58:47	1	113	87	183	46	63	114	227
5297	122197	SR	2013/09/18 15:06:19	B	20.955	37.104	20.955	37.104	1	0	-138	0	3	8	401677480.700	0.000	5128	28337	927	100	14500	2013/09/18 15:06:20	1	113	119	183	45	63	114	225
5297	122197	NL	2013/09/19 07:53:20	B	20.960	37.062	20.960	37.062	1	0	-134	0	3	0	401677508.710	0.000	4918	18864	1282	93	13908	2013/09/19 07:53:20	1	113	119	182	46	63	114	232
5297	122197	NN	2013/09/19 12:52:11	A	20.920	37.229	20.920	37.229	3	0	-131	400	3	8	401677498.530	0.000	1321	24167	72	79	3717	2013/09/19 12:50:17	1	113	119	181	47	64	114	229
5297	122197	SR	2013/09/19 14:32:31	B	20.924	37.209	20.924	37.209	2	0	-136	80	3	7	401677502.480	0.000	1636	3249	823	32	1617	2013/09/19 14:31:51	1	113	118	181	47	63	114	225
5297	122197	MA	2013/09/20 06:49:43	A	20.921	37.228	20.921	37.228	3	0	-125	378	3	0	401677497.130	0.000	155	341	70	108	285	2013/09/20 06:52:48	1	114	120	182	46	63	114	223
5297	122197	NL	2013/09/20 07:41:38	B	20.921	37.244	20.921	37.244	1	0	-134	0	3	8	401677500.790	0.000	511	575	453	96	1402	2013/09/20 07:41:38	1	114	119	179	49	65	114	225
5297	122197	MB	2013/09/20 07:48:26	B	20.921	37.237	20.921	37.237	1	0	-135	0	3	0	401677496.510	0.000	896	2130	376	88	2510	2013/09/20 07:48:27	1	114	118	178	179	65	114	225
5297	122197	NK	2013/09/20 14:45:02	A	20.911	37.191	20.911	37.191	3	0	-130	323	3	8	401677497.800	0.000	223	637	78	132	490	2013/09/20 14:44:17	2	114	119	179	49	65	114	225
5297	122197	MA	2013/09/21 08:14:21	B	20.927	37.384	20.927	37.384	1	0	-132	0	3	0	401677485.350	0.000	2061	2590	1639	78	5819	2013/09/21 08:14:22	1	114	121	181	47	64	118	218
5297	122197	NP	2013/09/21 10:02:23	B	20.924	37.250	20.924	37.250	2	0	-134	89	3	8	401677500.440	0.000	3678	68206	198	74	10399	2013/09/21 10:01:39	1	51	113	247	204	60	217	44
5297	122197	NN	2013/09/21 12:28:54	2	20.919	37.267	20.919	37.267	5	0	-130	200	3	58	401677497.490	0.000	418	1469	118	57	406	2013/09/21 12:29:42	1	115	118	178	49	66	114	221
5297	122197	NK	2013/09/22 02:50:28	B	20.922	37.304	20.922	37.304	1	0	-130	0	3	0	401677495.830	0.000	4157	5439	3176	87	5211	2013/09/22 02:50:28	1	115	120	184	47	65	122	220
5297	122197	SR	2013/09/22 03:54:47	B	20.923	37.307	20.923	37.307	1	0	-131	0	3	0	401677499.190	0.000	3900	6898	2204	90	4885	2013/09/22 03:54:48	1	115	120	181	48	67	118	219
5297	122197	MA	2013/09/22 06:10:55	B	20.924	37.209	20.924	37.209	2	0	-130	83	3	8	401677503.900	0.000	960	2656	346	16	2085	2013/09/22 06:10:14	1	119	120	180	56	10	98	240
5297	122197	NL	2013/09/22 07:16:50	2	20.907	37.209	20.907	37.209	4	0	-127	358	3	58	401677498.160	0.000	356	668	189	121	276	2013/09/22 07:20:40	1	116	120	178	50	68	114	221
5297	122197	MA	2013/09/22 07:55:33	B	20.902	37.205	20.902	37.205	2	0	-131	46	3	8	401677498.450	0.000	894	1042	766	85	1186	2013/09/22 07:55:10	1	124	120	178	50	67	114	221
5297	122197	NK	2013/09/22 13:55:53	A	20.926	37.196	20.926	37.196	3	0	-130	388	3	8	401677497.450	0.000	189	656	54	74	346	2013/09/22 13:58:11	1	116	118	177	51	65	114	220
5297	122197	NK	2013/09/22 15:38:36	B	20.922	37.188	20.922	37.188	1	0	-133	0	3	8	401677499.810	0.000	715	807	632	86	1980	2013/09/22 15:38:36	1	116	121	178	57	67	118	217
5297	122197	NN	2013/09/24 11:52:16	A	20.919	37.254	20.919	37.254	3	0	-136	334	3	0	401677506.540	0.000	799	9646	66	41	2230	2013/09/24 11:52:39	1	117	91	180
5297	122197	NK	2013/09/24 13:08:12	B	20.918	37.255	20.918	37.255	2	0	-134	90	3	8	401677502.920	0.000	875	3730	205	25	2445	2013/09/24 13:07:28	1	117	123	177	51	67	118	209
5297	122197	NN	2013/09/24 13:37:27	B	20.916	37.254	20.916	37.254	1	0	-136	0	3	0	401677502.840	0.000	939	2431	362	26	2626	2013/09/24 13:37:28	1	117	123	176	50	65	118	209
5297	122197	NK	2013/09/24 14:45:28	1	20.912	37.247	20.912	37.247	4	0	-131	163	3	58	401677498.310	0.000	1271	7887	204	69	1528	2013/09/24 14:45:50	1	117	123	178	48	63	118	209
5297	122197	NN							1	0	-132	0			401650000.000	0.000						2013/09/30 12:28:52	1	118	122	179	51	70	118	217
5297	122197	SR	2013/10/02 03:41:16	B	20.911	37.250	20.911	37.250	1	0	-132	0	3	0	401677505.030	0.000	4337	15421	1219	75	10347	2013/10/02 03:41:17	1	119	123	176	51	69	118	212
5297	122197	NK							1	0	-134	0			401650000.000	0.000						2013/10/04 14:01:34	1	120	117	177	51	70	110	213
5297	122197	NL	2013/10/13 06:22:12	B	20.927	37.254	20.927	37.254	2	0	-132	233	3	0	401677504.670	0.000	2602	88383	76	38	7353	2013/10/13 06:20:16	1	121	123	185	38	60	118	212
5297	122197	NN	2013/10/13 13:26:20	2	20.901	37.228	20.901	37.228	4	0	-129	495	3	58	401677492.930	0.000	281	795	99	107	349	2013/10/13 13:23:02	2	121	121	182	41	57	114	219
5297	122197	NK	2013/10/13 13:43:19	2	20.899	37.226	20.899	37.226	5	0	-126	239	3	50	401677492.350	0.000	278	527	146	43	267	2013/10/13 13:44:24	1	121	119	183	40	57	114	218
5297	122197	SR	2013/10/13 15:15:42	B	20.899	37.224	20.899	37.224	1	0	-128	0	3	8	401677486.900	0.000	1360	1534	1204	82	1831	2013/10/13 15:15:43	1	121	122	180	44	55	118	213
5297	122197	NP	2013/10/14 10:55:41	0	20.890	37.235	20.890	37.235	5	0	-128	285	3	50	401677490.750	0.000	2504	129059	48	77	3394	2013/10/14 10:57:10	1	122	120	180	44	55	114	220
5297	122197	NN	2013/10/14 11:32:50	B	20.889	37.230	20.889	37.230	1	0	-134	0	3	8	401677491.640	0.000	2266	10623	483	77	3762	2013/10/14 11:32:50	1	122	126	180	44	55	106	220
5297	122197	NN	2013/10/14 13:15:53	A	20.892	37.250	20.892	37.250	3	0	-126	370	3	8	401677492.630	0.000	215	1019	45	89	472	2013/10/14 13:15:24	1	122	119	179	44	55	118	216
5297	122197	NK	2013/10/14 13:18:44	B	20.893	37.249	20.893	37.249	2	0	-130	61	3	0	401677489.230	0.000	225	425	118	85	503	2013/10/14 13:18:14	1	122	122	181	41	57	118	216
5297	122197	SR							1	0	-137	0			401650000.000	0.000						2013/10/16 04:40:17	1	123	122	179	45	56	118	211
5297	122197	NL							1	0	-133	0			401650000.000	0.000						2013/10/16 05:43:38	1	123	121	51	43	56	118	209
5297	122197	MA	2013/10/16 06:12:36	0	20.909	37.224	20.909	37.224	4	0	-125	287	3	40	401677499.110	0.000	2074	4601	934	12	561	2013/10/16 06:15:20	1	123	120	177	46	54	118	211
5297	122197	MB	2013/10/16 07:07:02	B	20.903	37.215	20.903	37.215	2	0	-132	91	3	8	401677502.310	0.000	2372	6596	852	149	1109	2013/10/16 07:07:02	1	123	122	182	39	59	118	213
5297	122197	NL	2013/10/16 07:25:04	B	20.903	37.215	20.903	37.215	1	0	-129	0	3	0	401677497.890	0.000	2554	4351	1498	148	1379	2013/10/16 07:25:04	1	123	120	178	45	55	118	212
5297	122197	MA	2013/10/16 07:51:04	3	20.894	37.217	20.894	37.217	4	0	-124	220	3	60	401677489.730	0.000	202	542	75	78	461	2013/10/16 07:53:31	1	123	121	180	41	57	118	214
5297	122197	MA	2013/10/17 05:53:33	B	20.874	37.184	20.874	37.184	1	0	-132	0	3	0	401677477.150	0.000	2224	3119	1585	94	6282	2013/10/17 05:53:34	1	124	123	181	41	126	245	80
5297	122197	MB	2013/10/17 06:46:39	B	20.892	37.201	20.892	37.201	1	0	-132	0	3	8	401677480.310	0.000	2699	5414	1345	76	7627	2013/10/17 06:46:40	1	124	120	228	32	40	222	252
5297	122197	NL	2013/10/17 07:16:36	B	20.899	37.209	20.899	37.209	2	0	-130	106	3	0	401677492.960	0.000	2174	35228	134	88	6141	2013/10/17 07:15:43	1	124	122	180	43	55	118	211
5297	122197	NN	2013/10/17 12:39:35	B	20.906	37.207	20.906	37.207	2	0	-133	100	3	8	401677488.970	0.000	2239	63163	79	82	6323	2013/10/17 12:38:45	1	60	83	173	53	40	114	224
5297	122197	NK	2013/10/17 13:46:03	B	20.908	37.208	20.908	37.208	1	0	-131	0	3	8	401677484.390	0.000	2202	13587	357	81	6218	2013/10/17 13:46:04	1	124	126	181	41	57	122	219
5297	122197	NL	2013/10/18 07:04:12	B	20.926	37.218	20.926	37.218	1	0	-133	0	3	0	401677493.790	0.000	3053	5826	1599	82	8631	2013/10/18 07:04:12	1	125	122	179	45	56	118	211
5297	122197	MA	2013/10/18 07:11:45	A	20.922	37.201	20.922	37.201	3	0	-120	264	3	0	401677491.720	0.000	897	22358	36	101	2516	2013/10/18 07:13:34	1	125	121	178	45	56	118	212
5297	122197	NP	2013/10/18 10:12:19	A	20.937	37.242	20.937	37.242	3	0	-133	274	3	8	401677480.310	0.000	370	1765	77	47	835	2013/10/18 10:11:50	1	125	123	176	48	55	122	218
5297	122197	NP	2013/10/18 11:50:55	B	20.941	37.248	20.941	37.248	1	0	-137	0	3	8	401677491.670	0.000	1480	1747	1253	55	2087	2013/10/18 11:50:55	1	117	127	165	40	59	122	197
5297	122197	NK	2013/10/18 13:21:24	A	20.913	37.233	20.913	37.233	3	0	-133	268	3	8	401677488.190	0.000	320	924	111	40	623	2013/10/18 13:20:17	1	125	127	177	45	54	122	218
5297	122197	NL	2013/10/19 06:50:47	2	20.914	37.217	20.914	37.217	7	0	-128	358	3	50	401677492.070	0.000	461	3920	54	98	480	2013/10/19 06:53:17	1	126	122	179	42	56	118	214
5297	122197	MA	2013/10/19 06:52:08	3	20.914	37.215	20.914	37.215	5	0	-121	239	3	50	401677492.730	0.000	167	517	54	88	267	2013/10/19 06:54:17	1	126	120	177	45	56	118	213
5297	122197	NK	2013/10/19 12:57:42	B	20.899	37.216	20.899	37.216	1	0	-134	0	3	8	401677494.210	0.000	1289	1522	1090	78	3535	2013/10/19 12:57:43	1	126	126	177	41	190	98	39
5297	122197	NN	2013/10/19 14:00:44	B	20.906	37.216	20.906	37.216	1	0	-132	0	3	8	401677491.630	0.000	1488	1554	1423	16	4190	2013/10/19 14:00:44	1	126	125	177	46	55	122	218
5297	122197	NP	2013/10/20 11:33:36	B	20.920	37.214	20.920	37.214	1	0	-135	0	3	0	401677496.150	0.000	2357	4092	1357	82	6656	2013/10/20 11:33:36	1	127	122	181	41	57	118	212
5297	122197	NN	2013/10/20 12:06:11	B	20.930	37.197	20.930	37.197	2	0	-134	153	3	8	401677487.320	0.000	2289	46349	113	65	5479	2013/10/20 12:04:55	1	121	181	171	153	251	43	222
5297	122197	NL							1	0	-133	0			401650000.000	0.000						2013/10/22 06:15:35	1	126	129	186	59	41	124	196
5297	122197	NL	2013/10/22 07:52:06	B	20.939	37.195	20.939	37.195	2	0	-132	72	3	0	401677485.970	0.000	5669	35400	907	45	3945	2013/10/22 07:51:31	1	127	128	179	45	56	126	210
5297	122197	NK	2013/10/22 13:23:05	B	20.959	37.154	20.959	37.154	2	0	-133	145	3	8	401677482.600	0.000	3921	5933	2591	76	3858	2013/10/22 13:20:41	1	128	121	178	44	55	118	213
5297	122197	NN	2013/10/22 13:28:03	B	20.945	37.187	20.945	37.187	2	0	-131	83	3	0	401677483.900	0.000	1700	27842	103	62	3858	2013/10/22 13:27:22	1	128	127	177	44	56	122	213
5297	122197	MB	2013/10/25 07:25:25	B	20.930	37.168	20.930	37.168	2	0	-134	185	3	0	401677488.560	0.000	3361	104290	108	94	9503	2013/10/25 07:23:53	1	129	127	179	46	57	122	217
5297	122197	NN	2013/10/25 12:48:05	B	20.950	37.037	20.950	37.037	1	0	-138	0	3	8	401677486.640	0.000	11320	155786	822	95	32019	2013/10/25 12:48:06	1	201	118	178	44	56	122	217
5297	122197	NK	2013/10/25 13:49:03	B	20.940	37.034	20.940	37.034	1	0	-125	0	3	8	401677477.120	0.000	11360	164027	786	95	32134	2013/10/25 13:49:03	1	129	124	176	48	56	122	216
5297	122197	SR	2013/10/25 15:41:35	B	20.934	37.122	20.934	37.122	1	0	-130	0	3	8	401677472.650	0.000	5562	48073	643	101	15730	2013/10/25 15:41:36	1	129	127	180	45	57	122	216
5297	122197	SR	2013/10/26 04:26:21	B	20.919	37.260	20.919	37.260	2	0	-135	46	3	0	401677483.780	0.000	1196	3230	443	32	3369	2013/10/26 04:25:58	1	129	126	175	48	56	122	214
5297	122197	MA	2013/10/26 06:10:31	B	20.911	37.271	20.911	37.271	1	0	-132	0	3	8	401677493.430	0.000	1094	1476	810	37	3077	2013/10/26 06:10:32	1	129	124	175	48	58	122	218
5297	122197	NL	2013/10/26 07:06:18	B	20.911	37.270	20.911	37.270	1	0	-130	0	3	8	401677483.600	0.000	1363	1648	1127	77	3841	2013/10/26 07:06:19	1	129	125	175	49	120	122	93
5297	122197	NK	2013/10/26 13:23:39	B	20.901	37.311	20.901	37.311	2	0	-132	149	3	8	401677479.220	0.000	1398	14238	137	87	3936	2013/10/26 13:21:11	1	130	125	175	48	59	122	220
5297	122197	NK	2013/10/27 03:34:38	B	20.916	37.290	20.916	37.290	1	0	-136	0	3	0	401677462.960	0.000	3056	7510	1243	88	8639	2013/10/27 03:34:38	1	130	126	177	46	57	90	212
5297	122197	NL	2013/10/27 06:53:16	A	20.940	37.195	20.940	37.195	4	0	-131	150	3	8	401677485.120	0.000	669	11811	37	99	1863	2013/10/27 06:53:12	1	130	111	253	18	104	198	217
5297	122197	MA	2013/10/27 07:27:01	B	20.941	37.191	20.941	37.191	1	0	-127	0	3	8	401677486.860	0.000	775	2214	271	98	2167	2013/10/27 07:27:01	1	130	125	175	47	56	122	218
5297	122197	NN	2013/10/27 12:30:55	B	20.923	37.221	20.923	37.221	2	0	-129	45	3	8	401677461.790	0.000	709	2056	244	165	1968	2013/10/27 12:30:33	1	131	126	179	44	57	122	220
5297	122197	NK	2013/10/27 12:59:15	B	20.922	37.221	20.922	37.221	1	0	-133	0	3	0	401677475.510	0.000	810	1636	401	163	2260	2013/10/27 12:59:16	1	131	124	176	47	57	122	218
5297	122197	NN	2013/10/27 14:13:00	B	20.922	37.215	20.922	37.215	1	0	-138	0	3	8	401677473.540	0.000	999	1443	691	161	2798	2013/10/27 14:13:00	1	131	123	174	52	57	42	219
5297	122197	SR	2013/10/27 14:38:38	A	20.887	37.225	20.887	37.225	3	0	-137	222	3	0	401677480.560	0.000	611	1820	205	47	1030	2013/10/27 14:38:33	1	195	126	187	46	58	122	218
5297	122197	NK	2013/10/27 14:38:58	B	20.894	37.230	20.894	37.230	2	0	-132	51	3	0	401677488.510	0.000	787	2261	273	55	875	2013/10/27 14:38:33	1	131	126	175	46	58	122	218
5297	122197	NP	2013/10/28 11:46:46	B	20.888	37.231	20.888	37.231	1	0	-130	0	3	0	401677485.690	0.000	4200	7155	2465	76	5815	2013/10/28 11:46:46	1	131	126	176	47	58	122	219
5297	122197	NN	2013/10/28 12:13:38	A	20.888	37.251	20.888	37.251	3	0	-132	631	3	0	401677486.000	0.000	212	394	113	127	466	2013/10/28 12:17:21	1	131	124	173	51	53	122	219
5297	122197	NN	2013/10/28 14:02:22	A	20.884	37.251	20.884	37.251	3	0	-130	170	3	8	401677489.690	0.000	426	1178	153	8	1139	2013/10/28 14:01:24	1	131	125	175	47	59	122	217
5297	122197	NK	2013/10/28 14:16:38	0	20.894	37.253	20.894	37.253	4	0	-128	296	3	40	401677485.870	0.000	1924	17337	213	77	662	2013/10/28 14:14:24	1	131	126	175	46	57	122	217
5297	122197	NP	2013/10/29 11:33:53	B	20.872	37.195	20.872	37.195	1	0	-136	0	3	0	401677479.740	0.000	12663	16960	9454	54	6183	2013/10/29 11:33:53	1	132	126	175	48	220	230	185
5297	122197	NN	2013/10/29 12:06:57	B	20.889	37.233	20.889	37.233	2	0	-132	116	3	8	401677488.290	0.000	8036	132582	487	53	5537	2013/10/29 12:05:59	1	132	126	176	47	57	122	217
5297	122197	NK	2013/10/29 13:52:10	A	20.888	37.234	20.888	37.234	3	0	-128	178	3	8	401677487.560	0.000	191	281	129	173	374	2013/10/29 13:51:46	1	132	127	175	46	58	122	216
5297	122197	SR	2013/10/30 03:58:37	B	20.933	37.256	20.933	37.256	1	0	-126	0	3	0	401677505.100	0.000	1723	2606	1138	66	4844	2013/10/30 03:58:38	1	133	120	176	45	59	118	212
5297	122197	NL	2013/10/30 06:17:39	A	20.933	37.207	20.933	37.207	3	0	-134	166	3	8	401677489.450	0.000	2427	29595	199	99	3022	2013/10/30 06:18:39	1	133	121	176	44	60	118	212
5297	122197	MA	2013/10/30 08:03:37	B	20.937	37.202	20.937	37.202	1	0	-127	0	3	8	401677491.650	0.000	2882	7444	1115	100	3592	2013/10/30 08:03:37	1	133	120	174	47	60	118	212
5297	122197	NK	2013/10/31 03:34:52	B	20.933	37.194	20.933	37.194	2	0	-133	68	3	0	401677490.000	0.000	1788	10911	292	153	3852	2013/10/31 03:34:19	1	133	122	179	44	61	118	211
5297	122197	NL	2013/10/31 06:02:09	B	20.946	37.192	20.946	37.192	2	0	-131	48	3	8	401677496.750	0.000	2179	14665	323	157	6155	2013/10/31 06:01:46	1	134	121	175	45	59	118	211
5297	122197	MA	2013/10/31 06:03:27	B	20.954	37.180	20.954	37.180	1	0	-131	0	3	8	401677500.010	0.000	2344	8160	673	152	6622	2013/10/31 06:03:28	1	132	121	174	47	59	118	209
5297	122197	MB	2013/10/31 06:57:18	B	20.929	37.193	20.929	37.193	2	0	-132	161	3	8	401677486.120	0.000	762	13259	43	85	2129	2013/10/31 06:57:19	1	134	120	174	47	60	118	211
5297	122197	NK	2013/10/31 13:01:47	B	20.914	37.190	20.914	37.190	2	0	-136	95	3	8	401677491.930	0.000	1102	4812	252	65	3093	2013/10/31 13:00:12	1	134	121	175	46	60	118	212
5297	122197	NN	2013/10/31 13:28:46	B	20.926	37.202	20.926	37.202	2	0	-127	44	3	0	401677488.610	0.000	1060	6023	186	74	2805	2013/10/31 13:28:24	1	134	121	176	44	61	118	211
5297	122197	MA	2013/11/01 07:25:19	B	20.918	37.201	20.918	37.201	1	0	-126	0	3	0	401677494.810	0.000	2217	3483	1410	90	6263	2013/11/01 07:25:19	1	135	123	177	43	62	118	210
5297	122197	NL	2013/11/01 07:32:12	B	20.901	37.211	20.901	37.211	2	0	-133	240	3	0	401677486.120	0.000	2094	79157	55	100	5912	2013/11/01 07:32:13	1	135	122	143	109	180	161	62
5297	122197	NN	2013/11/01 13:12:54	A	20.941	37.199	20.941	37.199	3	0	-131	135	3	8	401677488.940	0.000	2737	32311	231	68	2785	2013/11/01 13:13:08	1	135	121	174	179	74	229	130
5297	122197	NK	2013/11/01 14:16:50	B	20.940	37.198	20.940	37.198	2	0	-130	133	3	8	401677487.630	0.000	2942	59891	144	75	2994	2013/11/01 14:15:44	1	135	121	173	47	60	118	211
5297	122197	SR	2013/11/02 04:02:24	B	20.925	37.193	20.925	37.193	1	0	-134	0	3	0	401677485.780	0.000	4744	6694	3362	65	5917	2013/11/02 04:02:24	1	135	129	177	108	240	179	238
5297	122197	MA	2013/11/02 07:00:21	B	20.925	37.206	20.925	37.206	2	0	-124	253	3	8	401677493.440	0.000	1100	10231	118	169	3094	2013/11/02 07:00:22	1	135	128	173	48	62	126	209
5297	122197	NP	2013/11/02 10:49:56	0	20.938	37.177	20.938	37.177	5	0	-128	280	3	58	401677486.320	0.000	1791	32631	98	78	1348	2013/11/02 10:51:36	1	136	129	174	46	59	126	206
5297	122197	NN	2013/11/02 13:03:12	B	20.932	37.173	20.932	37.173	2	0	-131	44	3	8	401677485.810	0.000	1958	14137	271	80	2084	2013/11/02 13:02:51	1	136	122	176	43	61	118	211
5297	122197	SR	2013/11/03 03:35:40	B	20.921	37.150	20.921	37.150	1	0	-134	0	3	0	401677485.760	0.000	4468	7717	2586	93	5323	2013/11/03 03:35:41	1	136	113	177	45	59	119	205
5297	122197	NL	2013/11/03 05:26:39	B	20.921	37.158	20.921	37.158	1	0	-138	0	3	8	401677484.880	0.000	2106	5687	779	93	5948	2013/11/03 05:26:39	1	168	95	164	48	30	126	207
5297	122197	MA	2013/11/03 06:38:45	A	20.906	37.216	20.906	37.216	3	0	-123	302	3	8	401677483.820	0.000	175	264	115	120	286	2013/11/03 06:41:44	1	136	128	174	45	108	126	102
5297	122197	NL	2013/11/03 07:07:45	B	20.911	37.216	20.911	37.216	2	0	-128	207	3	0	401677486.750	0.000	301	1984	45	99	781	2013/11/03 07:07:45	1	136	121	174	46	60	118	208
5297	122197	MA	2013/11/04 06:19:39	1	20.893	37.214	20.893	37.214	4	0	-128	221	3	50	401677484.480	0.000	703	1856	266	2	652	2013/11/04 06:21:53	1	137	122	174	45	62	118	221
5297	122197	NL	2013/11/04 06:53:32	B	20.891	37.219	20.891	37.219	1	0	-130	0	3	8	401677480.940	0.000	969	1071	875	1	1280	2013/11/04 06:53:32	1	137	123	174	43	42	112	200
5297	122197	MA	2013/11/04 08:02:05	B	20.892	37.216	20.892	37.216	1	0	-129	0	3	8	401677486.990	0.000	1326	1493	1177	107	2153	2013/11/04 08:02:05	1	137	123	174	45	62	118	205
5297	122197	NP	2013/11/04 10:27:50	B	20.895	37.221	20.895	37.221	2	0	-133	44	3	8	401677485.970	0.000	994	2888	341	95	2787	2013/11/04 10:27:28	1	138	121	172	47	60	118	208
5297	122197	NP	2013/11/05 10:20:13	3	20.893	37.225	20.893	37.225	4	0	-136	260	3	50	401677486.680	0.000	202	220	185	10	315	2013/11/05 10:20:39	1	138	176	174	45	56	126	208
5297	122197	NL	2013/11/06 06:29:28	B	20.912	37.225	20.912	37.225	1	0	-132	0	3	0	401677479.050	0.000	1926	3737	992	90	5439	2013/11/06 06:29:28	1	139	122	173	47	61	118	221
5297	122197	MA	2013/11/06 07:21:17	B	20.908	37.276	20.908	37.276	1	0	-129	0	3	8	401677482.510	0.000	5485	31838	944	94	15511	2013/11/06 07:21:17	1	139	128	238	46	189	254	208
5297	122197	NK	2013/11/06 15:37:24	B	20.906	37.281	20.906	37.281	1	0	-138	0	3	8	401677482.970	0.000	5591	32322	967	93	15810	2013/11/06 15:37:24	1	139	127	172	46	62	122	211
5297	122197	NK	2013/11/09 14:22:46	A	20.925	37.196	20.925	37.196	3	0	-128	196	3	0	401677482.040	0.000	205	633	66	82	422	2013/11/09 14:22:49	1	139	127	174	46	62	122	242
5297	122197	NK							1	0	-130	0			401650000.000	0.000						2013/11/13 14:26:18	1	140	129	177	43	62	126	205
5297	122197	MA							1	0	-128	0			401650000.000	0.000						2013/11/14 06:13:23	1	140	122	174	46	60	118	203
5297	122197	NN	2013/11/14 12:31:42	B	20.928	37.193	20.928	37.193	2	0	-129	250	3	0	401677487.640	0.000	2050	59985	70	129	5786	2013/11/14 12:29:37	1	140	119	172	47	60	118	207
5297	122197	NK	2013/11/14 13:57:56	B	20.934	37.185	20.934	37.185	1	0	-133	0	3	8	401677479.100	0.000	1887	7697	462	129	5324	2013/11/14 13:57:56	1	140	129	174	45	61	126	205
5297	122197	NN	2013/11/15 12:18:45	B	20.937	37.180	20.937	37.180	2	0	-131	127	3	0	401677480.230	0.000	1462	23802	89	45	4118	2013/11/15 12:17:42	1	140	121	174	13	44	118	205
5297	122197	NP							1	0	-138	0			401650000.000	0.000						2013/12/20 10:31:49	1	141	84	172	52	50	118	168
5297	122197	MB							1	0	-130	0			401650000.000	0.000						2013/12/21 07:46:51	1	141	123	172	39	54	118	163
5297	122197	NK							1	0	-134	0			401650000.000	0.000						2013/12/21 13:54:56	1	141	125	171	47	54	146	163
5297	122197	NN							1	0	-138	0			401650000.000	0.000						2013/12/21 14:00:53	1	141	144	173	39	55	138	164
5297	122197	MA							1	0	-134	0			401650000.000	0.000						2013/12/24 05:48:24	1	143	151	138	02	22	69	31
5297	122198	NK	2012/09/26 02:24:07	B	47.677	-122.139	47.677	-122.139	1	0	-134	0	3	8	401677486.800	0.000	2472	3906	1563	96	5071	2012/09/26 02:24:08	1	00	115	212	50	103	106	151
5297	122198	NL	2012/09/26 02:39:37	3	47.679	-122.139	47.679	-122.139	6	0	-125	420	3	50	401677486.310	0.000	219	459	104	95	306	2012/09/26 02:45:08	6	00	115	213	50	103	106	150
5297	122198	NM	2012/09/26 02:39:56	3	47.676	-122.136	47.676	-122.136	11	2	-119	660	3	50	401677486.940	0.000	226	1509	33	80	246	2012/09/26 02:45:08	7	00	115	213	50	103	106	150
5297	122198	MA	2012/09/26 03:27:07	3	47.678	-122.138	47.678	-122.138	6	0	-120	420	3	58	401677488.960	0.000	220	476	101	102	328	2012/09/26 03:31:08	3	00	116	213	50	104	110	145
5297	122198	NM	2012/09/26 04:21:07	2	47.677	-122.129	47.677	-122.129	4	0	-129	240	2	58	401677490.520	0.000	415	1811	95	65	1046	2012/09/26 04:23:08	3	00	117	214	50	104	110	140
5297	122198	NL	2012/09/26 04:22:19	3	47.680	-122.134	47.680	-122.134	10	0	-122	600	3	50	401677491.550	0.000	202	695	58	81	193	2012/09/26 04:27:08	9	00	117	214	50	104	110	140
5297	122198	MA	2012/09/26 05:06:57	3	47.679	-122.135	47.679	-122.135	10	5	-112	660	3	58	401677492.950	0.000	232	2013	26	81	360	2012/09/26 05:14:08	5	00	118	214	50	104	110	136
5297	122198	NL	2012/09/26 06:04:37	1	47.679	-122.133	47.679	-122.133	4	0	-133	180	3	58	401677493.880	0.000	1068	3182	358	72	1138	2012/09/26 06:06:08	4	01	119	214	50	104	110	133
5297	122198	MA	2012/09/26 06:51:07	1	47.682	-122.135	47.682	-122.135	4	0	-123	180	3	58	401677494.800	0.000	508	2120	121	73	1321	2012/09/26 06:53:08	4	01	112	213	50	104	106	130
5297	122198	NM							1	0	-124	0			401650000.000	0.000						2012/10/27 15:27:49	1	01	109	213	48	74	102	199
5297	122198	NM							1	0	-134	0			401650000.000	0.000						2012/10/29 14:39:49	1	01	105	215	49	91	98	225
5297	122198	NN							2	0	-122	292			401650000.000	0.000						2012/10/30 12:17:38	1	01	109	216	43	83	102	233
5297	122198	NN							1	0	-136	0			401650000.000	0.000						2012/10/30 14:00:23	1	01	110	215	47	74	106	229
5297	122198	NK	2012/10/30 15:13:58	2	20.465	37.247	12.691	2.095	7	0	-126	460	0	50	401677480.070	0.000	272	653	113	141	594	2012/10/30 15:16:54	1	01	111	214	49	72	106	225
5297	122198	NN	2012/10/31 12:06:47	B	20.477	37.245	20.477	37.245	2	0	-125	132	3	0	401677474.080	0.000	1721	36105	82	82	4853	2012/10/31 12:05:42	1	02	108	215	44	87	102	239
5297	122198	NK	2012/10/31 13:08:22	2	20.479	37.235	20.479	37.235	8	0	-122	432	3	50	401677479.630	0.000	442	1006	194	47	291	2012/10/31 13:11:11	1	02	104	215	45	87	98	253
5297	122198	NN	2012/10/31 13:49:56	1	20.500	37.230	20.500	37.230	5	0	-131	363	3	58	401677475.080	0.000	1187	2128	661	145	676	2012/10/31 13:50:58	1	02	105	215	47	76	102	244
5297	122198	NK	2012/10/31 14:49:22	2	20.496	37.238	20.496	37.238	9	0	-122	548	3	58	401677477.330	0.000	280	560	140	118	217	2012/10/31 14:52:55	1	02	110	215	48	74	106	226
5297	122198	NK	2012/11/01 12:48:07	B	20.581	37.275	20.581	37.275	1	0	-129	0	3	0	401677457.450	0.000	6427	8773	4707	62	6231	2012/11/01 12:48:08	1	02	114	214	45	86	106	219
5297	122198	NN	2012/11/01 13:34:45	B	20.530	37.250	20.530	37.250	1	0	-138	0	3	8	401677477.150	0.000	10986	27244	4429	31	11367	2012/11/01 13:34:46	1	02	117	216	44	85	114	199
5297	122198	NM	2012/11/01 15:06:49	0	20.474	37.246	20.474	37.246	4	0	-126	251	3	58	401677473.360	0.000	1564	7368	331	25	1285	2012/11/01 15:08:00	1	02	111	215	46	81	106	226
5297	122198	NL							1	0	-123	0			401650000.000	0.000						2012/11/04 07:04:12	1	03	113	214	51	85	106	231
5297	122198	MA	2012/11/04 07:15:46	B	20.881	37.355	20.881	37.355	2	1	-119	89	3	0	401677478.150	0.000	51367	0	918	102	8475	2012/11/04 07:14:18	1	03	109	216	41	82	106	231
5297	122198	NN	2012/11/04 11:19:38	1	20.924	37.261	20.924	37.261	8	0	-126	451	3	58	401677478.730	0.000	537	1292	222	51	295	2012/11/04 11:26:01	1	03	108	215	44	85	102	234
5297	122198	NP	2012/11/04 12:16:30	B	20.923	37.254	20.923	37.254	1	0	-137	0	3	8	401677477.390	0.000	2400	2598	2217	77	1485	2012/11/04 12:16:30	1	03	105	215	45	84	102	247
5297	122198	NL	2012/11/05 05:08:28	3	20.977	37.290	20.977	37.290	11	0	-125	566	3	50	401677477.640	0.000	229	314	166	25	260	2012/11/05 05:16:21	1	03	108	214	50	78	102	236
5297	122198	NM	2012/11/05 05:43:41	2	20.980	37.286	26.805	9.116	5	0	-124	463	4	58	401677477.840	0.000	458	833	251	137	504	2012/11/05 05:43:57	1	03	109	215	47	80	106	232
5297	122198	MA	2012/11/05 06:53:05	3	20.975	37.289	20.975	37.289	4	1	-117	254	3	58	401677476.960	0.000	229	1193	43	99	554	2012/11/05 06:54:44	1	04	109	215	45	85	102	234
5297	122198	NL	2012/11/05 06:55:50	2	20.974	37.291	20.974	37.291	5	0	-124	420	3	50	401677476.590	0.000	288	1033	80	109	319	2012/11/05 06:57:19	1	04	109	215	46	80	102	236
5297	122198	MA	2012/11/05 08:29:10	2	20.969	37.289	20.969	37.289	8	0	-122	469	3	58	401677476.260	0.000	347	588	204	9	362	2012/11/05 08:35:44	1	04	108	215	46	80	102	238
5297	122198	NP							1	0	-125	0			401650000.000	0.000						2012/11/07 10:06:14	1	04	111	211	46	78	106	229
5297	122198	NN	2012/11/07 10:55:36	B	20.927	37.291	20.927	37.291	2	0	-130	183	3	0	401677482.430	0.000	4572	60394	346	96	6028	2012/11/07 10:54:05	1	04	109	215	45	82	102	239
5297	122198	MA							1	0	-134	0			401650000.000	0.000						2012/11/09 05:32:18	1	134	242	215	39	74	106	225
5297	122198	NM	2012/11/09 05:50:22	A	21.213	37.215	21.213	37.215	3	0	-128	273	3	0	401677470.880	0.000	792	2967	211	131	963	2012/11/09 05:49:59	1	04	110	215	43	83	106	227
5297	122198	NL							1	0	-121	0			401650000.000	0.000						2012/11/09 06:06:48	1	04	112	215	45	88	106	227
5297	122198	NM	2012/11/09 15:18:56	1	21.221	37.180	21.221	37.180	5	0	-125	277	3	50	401677477.250	0.000	930	1958	441	159	505	2012/11/09 15:20:08	1	04	114	214	48	83	106	218
5297	122198	NL	2012/11/10 07:31:29	0	21.072	37.320	21.072	37.320	5	0	-123	471	3	40	401677475.110	0.000	1782	7998	396	159	803	2012/11/10 07:37:58	1	04	109	214	45	82	102	237
5297	122198	NN	2012/11/10 11:53:41	2	21.016	37.303	21.016	37.303	4	0	-121	517	3	58	401677474.820	0.000	292	831	102	78	302	2012/11/10 11:59:31	1	04	113	214	48	92	106	224
5297	122198	NK	2012/11/10 12:27:12	1	21.012	37.297	21.012	37.297	4	0	-130	185	3	58	401677475.430	0.000	1224	2084	718	25	899	2012/11/10 12:27:19	1	04	112	214	47	73	106	223
5297	122198	NN	2012/11/10 13:44:53	A	21.019	37.310	21.019	37.310	3	0	-129	432	3	8	401677475.080	0.000	444	716	275	176	600	2012/11/10 13:41:19	1	05	112	215	47	90	106	225
5297	122198	NK	2012/11/10 14:09:10	2	21.021	37.329	21.021	37.329	8	0	-120	590	3	50	401677475.330	0.000	472	2508	88	80	359	2012/11/10 14:05:28	2	05	112	214	47	73	106	221
5297	122198	NM	2012/11/10 14:54:16	A	21.018	37.323	21.018	37.323	3	0	-129	392	3	8	401677478.070	0.000	661	1399	311	23	649	2012/11/10 14:55:09	1	05	113	214	47	79	106	219
5297	122198	NK	2012/11/10 15:48:49	B	21.014	37.321	21.014	37.321	1	0	-134	0	3	8	401677476.470	0.000	579	637	524	39	1584	2012/11/10 15:48:49	1	05	112	214	50	70	106	219
5297	122198	NM	2012/11/11 03:22:08	B	20.964	37.294	20.964	37.294	2	0	-131	522	3	8	401677462.290	0.000	1290	15516	107	23	3634	2012/11/11 03:17:47	1	05	113	214	44	85	106	218
5297	122198	NK	2012/11/11 04:13:44	B	20.994	37.307	20.994	37.307	1	0	-132	0	3	8	401677465.560	0.000	2847	21102	384	23	8047	2012/11/11 04:13:45	1	05	112	214	48	73	106	218
5297	122198	NM	2012/11/11 04:58:05	B	21.016	37.322	21.016	37.322	1	0	-121	0	3	0	401677475.340	0.000	1938	2108	1781	118	5472	2012/11/11 04:58:05	1	05	113	214	47	81	106	221
5297	122198	NL	2012/11/11 05:39:16	A	21.020	37.303	21.020	37.303	3	0	-125	328	3	0	401677474.470	0.000	250	824	75	43	627	2012/11/11 05:43:20	1	05	111	214	48	72	106	224
5297	122198	MA	2012/11/11 06:31:23	1	21.025	37.289	21.025	37.289	6	0	-120	249	3	58	401677472.990	0.000	1302	4888	346	117	981	2012/11/11 06:34:23	1	06	111	213	51	66	106	222
5297	122198	NL	2012/11/11 07:27:09	B	21.034	37.281	21.034	37.281	1	0	-131	0	3	8	401677480.440	0.000	1994	2726	1459	113	1740	2012/11/11 07:27:10	1	06	111	215	47	76	106	228
5297	122198	NN	2012/11/11 11:43:02	1	21.013	37.310	21.013	37.310	6	0	-122	619	3	48	401677474.510	0.000	897	1573	511	115	376	2012/11/11 11:47:10	1	06	109	214	44	82	102	236
5297	122198	NN	2012/11/11 13:30:12	1	21.015	37.296	21.015	37.296	5	0	-128	413	3	58	401677474.760	0.000	1161	4288	314	113	681	2012/11/11 13:30:09	1	06	112	214	47	81	106	225
5297	122198	NK	2012/11/11 13:42:43	3	21.014	37.308	21.014	37.308	10	0	-120	577	3	50	401677476.020	0.000	206	514	82	79	218	2012/11/11 13:44:16	1	06	110	215	44	80	106	224
5297	122198	NM	2012/11/12 04:35:56	B	21.016	37.307	21.016	37.307	1	0	-120	0	3	0	401677472.960	0.000	10392	14644	7374	91	5144	2012/11/12 04:35:56	1	06	112	214	47	75	106	219
5297	122198	NL	2012/11/12 05:29:58	B	21.013	37.311	21.013	37.311	2	0	-127	100	3	0	401677472.720	0.000	6649	50336	878	59	3485	2012/11/12 05:29:09	1	06	112	215	45	86	106	221
5297	122198	NP	2012/11/12 12:35:02	B	20.982	37.414	20.982	37.414	1	0	-136	0	3	8	401677493.920	0.000	3902	6213	2449	73	4836	2012/11/12 12:35:02	1	07	114	214	48	91	98	127
5297	122198	NN	2012/11/12 13:14:40	B	20.975	37.416	20.975	37.416	1	0	-132	0	3	7	401677508.860	0.000	4135	6234	2742	82	5113	2012/11/12 13:14:41	1	07	112	215	45	212	42	204
5297	122198	NK	2012/11/12 13:14:40	B	20.980	37.408	20.980	37.408	1	0	-130	0	3	8	401677465.030	0.000	4161	6296	2749	77	5111	2012/11/12 13:14:41	1	07	112	215	45	84	106	220
5297	122198	NK	2012/11/12 15:02:13	1	20.999	37.286	20.999	37.286	4	0	-124	573	3	48	401677477.510	0.000	725	1175	447	106	327	2012/11/12 15:00:21	1	07	115	214	48	87	110	217
5297	122198	NL	2012/11/13 05:17:48	1	20.909	37.214	20.909	37.214	6	0	-126	291	3	50	401677473.230	0.000	791	1836	340	40	599	2012/11/13 05:19:13	1	07	114	213	44	89	106	223
5297	122198	MA	2012/11/13 05:50:07	A	20.903	37.207	20.903	37.207	3	0	-126	97	3	8	401677472.440	0.000	1177	1678	825	72	1113	2012/11/13 05:50:05	1	07	114	214	48	87	110	217
5297	122198	NM	2012/11/13 05:50:57	2	20.914	37.216	20.914	37.216	4	0	-126	378	3	50	401677474.640	0.000	415	617	278	4	432	2012/11/13 05:55:58	1	07	113	214	45	83	106	223
5297	122198	NL	2012/11/13 06:57:39	1	20.907	37.219	20.907	37.219	6	0	-125	497	3	48	401677475.220	0.000	605	1766	207	115	276	2012/11/13 07:02:35	1	07	111	214	47	79	106	227
5297	122198	MA	2012/11/13 07:24:07	A	20.906	37.226	20.906	37.226	3	2	-114	378	3	0	401677476.870	0.000	867	1221	615	29	560	2012/11/13 07:29:23	1	07	112	214	46	76	106	227
5297	122198	NP	2012/11/13 09:03:52	B	20.901	37.213	20.901	37.213	2	0	-134	45	3	8	401677472.740	0.000	761	782	741	151	1903	2012/11/13 09:03:30	1	08	111	214	46	75	104	165
5297	122198	MA	2012/11/13 09:06:32	B	20.902	37.215	20.902	37.215	1	0	-131	0	3	0	401677475.600	0.000	763	988	589	73	2131	2012/11/13 09:06:32	1	08	111	214	47	79	106	228
5297	122198	NM	2012/11/14 03:50:05	3	20.923	37.192	20.923	37.192	5	0	-123	482	3	50	401677475.680	0.000	221	319	152	151	291	2012/11/14 03:51:45	1	08	114	214	45	87	110	215
5297	122198	NL	2012/11/14 05:05:51	2	20.923	37.196	20.923	37.196	7	0	-128	490	3	58	401677475.040	0.000	310	428	223	24	404	2012/11/14 05:08:31	1	08	114	214	45	88	106	221
5297	122198	MA	2012/11/14 05:26:03	B	20.924	37.198	20.924	37.198	2	0	-131	105	3	0	401677474.670	0.000	556	633	488	17	911	2012/11/14 05:25:11	1	08	113	214	45	76	106	219
5297	122198	NL	2012/11/14 06:43:12	2	20.922	37.204	20.922	37.204	5	0	-125	465	3	58	401677474.740	0.000	286	608	134	105	224	2012/11/14 06:46:31	1	08	112	214	44	83	106	220
5297	122198	MA	2012/11/14 07:02:52	2	20.925	37.193	20.925	37.193	5	2	-117	500	3	50	401677475.020	0.000	367	1269	106	110	379	2012/11/14 07:08:59	1	08	113	213	49	89	106	228
5297	122198	MA	2012/11/14 08:47:11	B	20.922	37.190	20.922	37.190	1	0	-124	0	3	8	401677473.320	0.000	1495	1672	1335	96	1994	2012/11/14 08:47:11	1	09	112	215	45	78	106	226
5297	122198	NP	2012/11/14 10:31:36	1	20.930	37.198	20.930	37.198	5	0	-123	442	3	58	401677473.120	0.000	532	1024	275	62	276	2012/11/14 10:31:55	1	09	112	214	46	85	106	226
5297	122198	NN	2012/11/14 11:12:08	1	20.932	37.211	20.932	37.211	4	0	-126	282	3	58	401677470.490	0.000	648	1664	252	45	596	2012/11/14 11:15:52	1	09	111	214	46	82	106	227
5297	122198	NP	2012/11/14 12:17:09	B	20.922	37.193	20.922	37.193	2	0	-131	423	3	8	401677473.580	0.000	802	2968	216	156	1175	2012/11/14 12:10:06	1	09	113	214	45	85	106	220
5297	122198	NL	2012/11/15 04:56:24	1	20.927	37.194	20.927	37.194	6	0	-129	393	3	50	401677475.690	0.000	911	2874	288	30	848	2012/11/15 04:55:59	1	09	112	213	47	77	106	218
5297	122198	NM	2012/11/15 05:09:01	2	20.928	37.202	20.928	37.202	6	0	-120	464	3	50	401677475.700	0.000	287	1100	75	113	261	2012/11/15 05:12:18	1	09	113	214	45	81	124	243
5297	122198	NL	2012/11/15 06:37:25	1	20.927	37.199	20.927	37.199	6	0	-120	425	3	58	401677475.690	0.000	1390	16776	115	104	824	2012/11/15 06:39:26	1	09	111	213	45	78	106	228
5297	122198	MA	2012/11/15 06:48:08	A	20.925	37.190	20.925	37.190	3	2	-117	418	3	8	401677474.020	0.000	364	1588	83	92	478	2012/11/15 06:48:08	1	09	112	214	44	86	106	223
5297	122198	MA	2012/11/15 08:24:09	A	20.931	37.185	20.931	37.185	3	0	-121	450	3	8	401677476.010	0.000	225	465	108	148	533	2012/11/15 08:25:13	1	09	110	214	44	84	106	227
5297	122198	NP	2012/11/15 10:21:36	1	20.921	37.190	20.921	37.190	5	0	-124	372	3	58	401677473.880	0.000	516	1342	198	55	277	2012/11/15 10:23:25	1	09	111	213	47	78	106	225
5297	122198	NN	2012/11/15 10:59:46	B	20.913	37.200	20.913	37.200	2	0	-130	394	3	8	401677478.420	0.000	1187	4312	326	37	911	2012/11/15 10:59:46	1	10	111	214	45	84	106	223
5297	122198	NP	2012/11/15 12:03:37	A	20.918	37.189	20.918	37.189	3	0	-126	326	3	8	401677476.140	0.000	1239	4399	348	113	880	2012/11/15 12:03:06	1	10	111	213	47	75	106	223
5297	122198	NN	2012/11/15 12:38:53	2	20.920	37.190	20.920	37.190	10	0	-124	774	3	58	401677476.310	0.000	353	702	177	51	222	2012/11/15 12:50:40	1	10	112	214
5297	122198	NL	2012/11/16 04:40:13	A	20.881	37.228	20.881	37.228	3	0	-134	232	3	0	401677480.570	0.000	1011	4600	222	16	2695	2012/11/16 04:39:37	1	10	117	213	44	78	110	213
5297	122198	NM	2012/11/16 04:39:37	B	20.906	37.205	20.906	37.205	1	0	-122	0	3	0	401677480.250	0.000	8152	9003	7381	92	5913	2012/11/16 04:39:37	1	10	117	213	44	78	110	213
5297	122198	NL	2012/11/16 06:18:31	B	20.870	37.229	20.870	37.229	2	0	-121	502	3	8	401677475.200	0.000	562	2343	134	89	1555	2012/11/16 06:18:31	1	10	226	214	45	80	110	214
5297	122198	MA	2012/11/16 06:21:11	B	20.877	37.226	20.877	37.226	2	0	-121	342	3	0	401677477.990	0.000	804	8003	80	162	2249	2012/11/16 06:21:11	1	10	112	213	47	72	110	217
5297	122198	NL	2012/11/16 08:01:59	1	20.889	37.234	20.889	37.234	5	0	-125	230	3	58	401677478.600	0.000	708	2653	188	156	1689	2012/11/16 08:04:00	1	10	112	213	45	75	106	223
5297	122198	MA	2012/11/16 08:02:07	3	20.880	37.245	20.880	37.245	9	3	-116	482	3	50	401677475.320	0.000	175	247	123	143	209	2012/11/16 08:08:32	1	10	110	213	48	72	106	228
5297	122198	NP	2012/11/16 10:09:04	1	20.861	37.238	20.861	37.238	8	0	-123	411	3	58	401677477.700	0.000	643	1892	218	64	336	2012/11/16 10:10:27	1	11	109	213	48	76	106	234
5297	122198	NN	2012/11/16 10:52:53	A	20.852	37.242	20.852	37.242	3	0	-129	364	3	8	401677479.360	0.000	1155	3005	444	35	766	2012/11/16 10:53:56	1	11	111	214	44	85	106	222
5297	122198	NP	2012/11/16 11:56:12	2	20.866	37.239	20.866	37.239	6	0	-126	520	3	58	401677474.980	0.000	254	472	136	141	336	2012/11/16 11:55:39	1	11	113	213	46	83	106	221
5297	122198	NN	2012/11/16 12:29:53	B	20.866	37.239	20.866	37.239	1	0	-129	0	3	8	401677474.960	0.000	667	714	622	110	1174	2012/11/16 12:29:54	1	11	113	215	45	82	110	216
5297	122198	MA	2012/11/17 07:47:46	A	20.879	37.234	20.879	37.234	3	0	-122	98	3	0	401677475.890	0.000	1574	13832	179	84	4439	2012/11/17 07:47:47	1	11	114	213	44	85	110	217
5297	122198	NL	2012/11/17 07:51:57	B	20.879	37.236	20.879	37.236	1	0	-130	0	3	0	401677475.670	0.000	1571	12193	202	84	4431	2012/11/17 07:51:58	1	11	111	213	47	78	106	220
5297	122198	NK	2012/11/17 12:55:30	B	20.887	37.237	20.887	37.237	2	0	-126	113	3	8	401677493.850	0.000	1106	6852	178	47	3105	2012/11/17 12:54:34	1	11	114	213	48	75	110	212
5297	122198	NP	2012/11/18 11:32:19	B	20.959	37.102	20.959	37.102	2	0	-124	281	3	0	401677500.450	0.000	1793	45854	70	30	5058	2012/11/18 11:29:59	1	11	113	213	47	74	110	216
5297	122198	NK	2012/11/18 12:33:09	B	20.957	37.099	20.957	37.099	1	0	-130	0	3	8	401677500.350	0.000	1912	9058	403	30	5395	2012/11/18 12:33:10	1	11	51	245	54	115	241	181
5297	122198	NK	2012/11/18 14:10:45	3	21.036	37.146	21.036	37.146	7	0	-121	630	3	58	401677475.820	0.000	246	1102	54	78	299	2012/11/18 14:14:25	1	12	115	213	47	83	110	211
5297	122198	MA	2012/11/19 07:01:10	2	21.128	37.174	21.128	37.174	10	5	-115	517	3	50	401677475.430	0.000	409	949	175	98	236	2012/11/19 07:08:40	1	12	111	212	52	67	106	220
5297	122198	NL	2012/11/19 07:26:11	1	21.131	37.182	21.131	37.182	7	0	-124	286	3	50	401677476.690	0.000	796	2391	265	128	526	2012/11/19 07:29:03	1	12	111	212	49	74	106	222
5297	122198	MA	2012/11/19 08:42:04	B	21.146	37.189	21.146	37.189	1	0	-126	0	3	8	401677485.440	0.000	2358	2652	2095	113	1759	2012/11/19 08:42:05	1	12	112	213	46	82	103	215
5297	122198	NP	2012/11/19 11:21:58	3	21.132	37.178	21.132	37.178	8	0	-122	551	3	58	401677475.050	0.000	183	264	126	70	169	2012/11/19 11:23:18	1	12	99	84	03	87	00	138
5297	122198	NN	2012/11/19 11:57:21	B	21.137	37.180	21.137	37.180	1	0	-131	0	3	8	401677473.760	0.000	816	886	751	87	1169	2012/11/19 11:57:22	1	12	115	213	46	79	110	216
5297	122198	NM	2012/11/20 04:45:14	B	21.119	37.171	21.119	37.171	1	0	-122	0	3	0	401677498.920	0.000	3865	4371	3418	103	6055	2012/11/20 04:45:14	1	12	115	212	47	75	110	207
5297	122198	NL	2012/11/20 05:34:08	B	21.051	37.182	21.051	37.182	2	0	-126	85	3	0	401677483.210	0.000	2299	17739	297	70	3795	2012/11/20 05:33:26	1	12	116	213	46	88	110	211
5297	122198	MA	2012/11/20 06:37:14	1	21.025	37.133	21.025	37.133	4	0	-121	673	3	58	401677474.530	0.000	502	1452	173	98	318	2012/11/20 06:46:33	1	13	114	213	46	82	110	214
5297	122198	NL	2012/11/20 07:17:19	B	21.022	37.124	21.022	37.124	1	0	-128	0	3	8	401677475.600	0.000	1378	1548	1226	92	1264	2012/11/20 07:17:19	1	13	117	213	50	80	110	216
5297	122198	MA	2012/11/20 08:26:37	B	21.022	37.124	21.022	37.124	1	0	-128	0	3	8	401677473.800	0.000	1819	1989	1662	90	2047	2012/11/20 08:26:37	1	13	115	213	47	84	110	214
5297	122198	NN	2012/11/20 11:49:56	B	20.999	37.148	20.999	37.148	2	0	-124	50	3	8	401677467.790	0.000	932	5735	151	47	2610	2012/11/20 11:49:32	1	13	115	213	45	83	110	209
5297	122198	MA	2012/11/20 19:33:07	B	20.940	37.093	20.940	37.093	2	1	-118	271	3	8	401677446.030	0.000	1093	20071	59	98	3061	2012/11/20 19:28:36	1	13	118	211	45	85	110	204
5297	122198	NM	2012/11/21 04:26:31	3	20.929	37.195	20.929	37.195	6	0	-122	562	3	58	401677475.310	0.000	237	424	131	78	235	2012/11/21 04:29:27	1	13	117	212	46	83	110	207
5297	122198	NM	2012/11/21 06:05:12	B	20.921	37.191	20.921	37.191	1	0	-130	0	3	8	401677473.750	0.000	1471	1623	1332	90	1917	2012/11/21 06:05:13	1	13	115	213	45	82	110	212
5297	122198	NL	2012/11/21 06:59:13	B	20.917	37.190	20.917	37.190	1	0	-123	0	3	8	401677468.070	0.000	1789	1976	1619	108	2334	2012/11/21 06:59:13	1	13	113	213	44	84	110	217
5297	122198	NP	2012/11/21 09:16:02	1	20.898	37.215	20.898	37.215	7	0	-130	315	3	58	401677467.270	0.000	1366	3362	554	166	827	2012/11/21 09:20:34	1	13	112	212	46	79	238	221
5297	122198	NM	2012/11/22 04:02:40	B	20.846	37.218	20.846	37.218	2	0	-128	140	3	0	401677483.320	0.000	5500	96760	312	85	4088	2012/11/22 04:01:31	1	13	118	211	49	81	110	207
5297	122198	NL	2012/11/22 05:10:46	B	20.849	37.198	20.849	37.198	2	0	-129	48	3	8	401677479.520	0.000	2891	12689	658	81	4018	2012/11/22 05:10:23	1	13	117	213	42	86	110	208
5297	122198	NM	2012/11/22 05:41:52	A	20.846	37.181	20.846	37.181	3	0	-125	236	3	8	401677474.940	0.000	490	1533	156	140	817	2012/11/22 05:41:38	1	13	115	213	43	84	110	211
5297	122198	MA	2012/11/22 06:05:59	B	20.852	37.206	20.852	37.206	1	0	-133	0	3	8	401677479.140	0.000	6852	13392	3505	66	5205	2012/11/22 06:06:00	1	13	114	213	45	76	110	214
5297	122198	NL	2012/11/22 06:49:57	A	20.846	37.196	20.846	37.196	3	0	-126	261	3	8	401677472.970	0.000	595	7913	44	100	1648	2012/11/22 06:52:32	1	13	115	213	42	83	110	215
5297	122198	NN	2012/11/22 11:27:36	A	20.894	37.171	20.894	37.171	3	0	-124	402	3	8	401677474.890	0.000	332	1247	88	45	627	2012/11/22 11:29:07	1	13	114	212	45	78	110	216
5297	122198	NP	2012/11/22 12:28:54	B	20.891	37.166	20.891	37.166	1	0	-133	0	3	8	401677479.490	0.000	1395	1711	1137	57	1686	2012/11/22 12:28:55	1	14	114	213	42	82	110	216
5297	122198	NN	2012/11/22 13:06:54	A	20.897	37.165	20.897	37.165	3	0	-129	111	3	8	401677473.880	0.000	601	2101	171	75	1656	2012/11/22 13:05:52	1	14	116	212	44	79	110	211
5297	122198	NK	2012/11/22 14:11:54	0	20.902	37.187	20.902	37.187	4	0	-122	333	3	58	401677477.240	0.000	1881	20190	175	73	1030	2012/11/22 14:12:54	1	14	115	213	43	83	110	209
5297	122198	NL	2012/11/23 04:56:16	B	20.917	37.221	20.917	37.221	1	0	-130	0	3	0	401677488.290	0.000	7040	9094	5450	92	5429	2012/11/23 04:56:17	1	14	116	212	43	84	110	209
5297	122198	NM	2012/11/23 05:18:37	3	20.890	37.191	20.890	37.191	5	0	-124	246	3	50	401677472.570	0.000	220	830	58	119	483	2012/11/23 05:19:20	1	14	115	212	45	80	110	209
5297	122198	MA	2012/11/23 05:37:56	A	20.903	37.189	20.903	37.189	3	0	-128	293	3	8	401677476.530	0.000	1128	6815	186	17	2441	2012/11/23 05:38:19	1	14	115	212	45	80	110	211
5297	122198	NL	2012/11/23 06:37:18	B	20.901	37.181	20.901	37.181	1	0	-130	0	3	8	401677476.120	0.000	1060	1818	617	19	2316	2012/11/23 06:37:19	1	14	114	213	43	83	110	216
5297	122198	MA	2012/11/23 07:17:14	1	20.895	37.188	20.895	37.188	6	0	-120	510	3	58	401677474.110	0.000	926	8699	98	109	847	2012/11/23 07:24:55	1	14	115	212	44	84	110	216
5297	122198	NN	2012/11/23 11:13:38	1	20.893	37.171	20.893	37.171	5	0	-127	285	3	58	401677475.910	0.000	929	4524	190	58	917	2012/11/23 11:16:44	1	14	115	212	44	78	110	211
5297	122198	NP	2012/11/23 12:21:38	B	20.890	37.168	20.890	37.168	1	0	-132	0	3	8	401677478.210	0.000	1540	2076	1141	63	1873	2012/11/23 12:21:39	1	14	115	213	46	77	110	212
5297	122198	NN	2012/11/23 12:58:03	A	20.895	37.184	20.895	37.184	3	0	-126	375	3	8	401677476.190	0.000	1501	15446	145	88	1290	2012/11/23 12:53:18	1	14	117	211	52	89	110	211
5297	122198	NK	2012/11/23 13:46:02	B	20.891	37.181	20.891	37.181	2	0	-128	102	3	8	401677475.980	0.000	1701	3553	814	93	1753	2012/11/23 13:45:11	1	14	116	213	44	84	110	209
5297	122198	NM	2012/11/24 04:56:42	B	20.861	37.226	20.861	37.226	1	0	-124	0	3	0	401677460.060	0.000	4739	5533	4057	87	5999	2012/11/24 04:56:43	1	15	118	212	44	84	110	206
5297	122198	NL	2012/11/24 06:30:37	B	20.880	37.202	20.880	37.202	1	0	-129	0	3	8	401677472.860	0.000	6575	12097	3573	121	9024	2012/11/24 06:30:38	1	15	114	212	48	78	110	213
5297	122198	MA	2012/11/24 07:00:48	B	20.924	37.204	20.924	37.204	2	1	-118	254	3	8	401677474.730	0.000	6486	295956	142	113	7612	2012/11/24 07:00:49	1	15	116	213	45	87	110	213
5297	122198	NL	2012/11/24 08:06:30	B	20.947	37.215	20.947	37.215	1	0	-134	0	3	8	401677481.100	0.000	6054	39894	918	113	7089	2012/11/24 08:06:30	1	15	114	212	45	82	110	217
5297	122198	MA	2012/11/24 08:35:41	B	20.954	37.194	20.954	37.194	2	0	-126	451	3	0	401677478.270	0.000	2311	27481	194	7	3828	2012/11/24 08:35:42	1	15	68	212	47	85	110	213
5297	122198	NP	2012/11/24 10:22:45	B	20.982	37.200	20.982	37.200	1	0	-128	0	3	8	401677465.490	0.000	1422	3306	611	9	4007	2012/11/24 10:22:46	1	15	114	213	45	80	110	215
5297	122198	NN	2012/11/24 12:47:43	B	20.958	37.189	20.958	37.189	2	0	-121	248	3	8	401677465.210	0.000	1933	50344	74	14	5455	2012/11/24 12:45:39	1	15	113	212	49	71	110	213
5297	122198	NK	2012/11/24 13:25:05	B	20.970	37.191	20.970	37.191	1	0	-126	0	3	8	401677452.100	0.000	2174	14001	337	12	6137	2012/11/24 13:25:05	1	15	115	212	46	79	110	207
5297	122198	NM	2012/11/25 06:09:08	B	20.936	37.183	20.936	37.183	1	0	-130	0	3	0	401677475.430	0.000	2023	2644	1548	105	5714	2012/11/25 06:09:09	1	15	107	211	49	73	102	207
5297	122198	NL	2012/11/25 06:19:30	B	20.939	37.183	20.939	37.183	1	0	-131	0	3	0	401677472.660	0.000	2674	3471	2059	4	7556	2012/11/25 06:19:30	1	15	108	212	46	79	102	208
5297	122198	MA	2012/11/25 06:35:01	A	20.933	37.195	20.933	37.195	3	1	-118	459	3	0	401677473.540	0.000	166	330	83	72	334	2012/11/25 06:37:37	1	15	109	212	44	84	102	209
5297	122198	NL	2012/11/25 07:50:38	B	20.943	37.197	20.943	37.197	1	0	-129	0	3	8	401677478.180	0.000	615	669	564	90	1705	2012/11/25 07:50:39	1	15	107	211	46	79	102	209
5297	122198	MA	2012/11/25 08:19:57	A	20.931	37.195	20.931	37.195	3	1	-119	396	3	0	401677472.010	0.000	228	542	95	137	544	2012/11/25 08:19:04	1	15	106	212	46	75	102	215
5297	122198	NN	2012/11/25 12:35:52	B	20.931	37.192	20.931	37.192	2	0	-123	236	3	8	401677477.700	0.000	760	7028	82	139	2117	2012/11/25 12:33:55	1	15	108	212	45	82	102	207
5297	122198	NM	2012/11/26 05:47:33	B	20.935	37.187	20.935	37.187	1	0	-126	0	3	0	401677475.820	0.000	2071	2922	1467	89	5848	2012/11/26 05:47:33	1	15	109	211	45	79	106	201
5297	122198	NL	2012/11/26 05:59:04	A	20.932	37.167	20.932	37.167	3	0	-124	493	3	0	401677474.640	0.000	865	15248	49	70	2424	2012/11/26 06:06:13	1	15	109	212	44	84	102	206
5297	122198	NL	2012/11/26 07:45:05	B	20.965	37.197	20.965	37.197	1	0	-133	0	3	8	401677483.430	0.000	2870	4676	1761	41	8111	2012/11/26 07:45:05	1	16	109	211	46	86	102	209
5297	122198	NP	2012/11/26 11:46:28	B	20.934	37.180	20.934	37.180	2	0	-125	214	3	8	401677476.880	0.000	1306	19802	86	112	3677	2012/11/26 11:42:54	1	16	107	211	51	67	106	204
5297	122198	NN	2012/11/26 12:18:34	1	20.936	37.179	20.936	37.179	6	0	-123	594	3	48	401677475.720	0.000	903	3225	253	80	400	2012/11/26 12:26:35	1	16	109	211	47	72	43	198
5297	122198	NK	2012/11/26 12:35:21	B	20.936	37.178	20.936	37.178	2	0	-131	148	3	0	401677475.150	0.000	1396	2308	843	64	801	2012/11/26 12:34:07	1	16	110	211	45	78	106	198
5297	122198	NL	2012/11/27 05:49:31	B	20.938	37.171	20.938	37.171	1	0	-127	0	3	0	401677482.790	0.000	8321	13723	5045	110	5258	2012/11/27 05:49:31	1	16	109	211	43	83	102	208
5297	122198	NP	2012/11/27 09:54:03	2	20.923	37.206	20.923	37.206	4	0	-127	430	3	58	401677475.360	0.000	453	1032	198	45	434	2012/11/27 09:55:49	1	16	109	211	45	78	106	203
5297	122198	NN	2012/11/27 10:34:28	A	20.923	37.206	20.923	37.206	3	0	-131	192	3	8	401677472.060	0.000	633	1053	379	139	1011	2012/11/27 10:33:55	1	16	107	211	45	86	98	228
5297	122198	NP	2012/11/27 11:37:14	2	20.917	37.210	20.917	37.210	10	0	-125	731	3	58	401677474.530	0.000	288	362	228	106	170	2012/11/27 11:38:46	2	17	108	211	47	75	102	205
5297	122198	NN	2012/11/27 12:06:54	1	20.915	37.203	20.915	37.203	11	0	-121	588	3	50	401677475.690	0.000	689	4790	99	76	439	2012/11/27 12:15:57	1	17	109	211	46	76	102	211
5297	122198	NL	2012/11/28 05:40:16	B	20.874	37.238	20.874	37.238	1	0	-130	0	3	0	401677481.470	0.000	9099	10296	8041	125	5948	2012/11/28 05:40:16	1	17	109	210	45	76	106	199
5297	122198	NL	2012/11/28 07:22:05	B	20.905	37.198	20.905	37.198	1	0	-131	0	3	8	401677465.990	0.000	11882	21725	6498	144	8188	2012/11/28 07:22:05	1	17	110	211	44	82	102	207
5297	122198	MA	2012/11/28 07:22:05	B	20.888	37.218	20.888	37.218	1	0	-127	0	3	8	401677472.530	0.000	13791	30553	6225	137	9504	2012/11/28 07:22:05	1	17	110	211	44	82	102	207
5297	122198	MA	2012/11/28 08:57:52	B	20.902	37.204	20.902	37.204	2	0	-127	53	3	8	401677465.990	0.000	2317	7560	709	150	6544	2012/11/28 08:57:26	1	17	109	211	45	79	106	205
5297	122198	NP	2012/11/28 09:41:16	2	20.909	37.212	20.909	37.212	6	0	-127	424	3	57	401677478.350	0.000	439	1206	159	35	502	2012/11/28 09:45:00	1	17	108	211	42	78	102	208
5297	122198	NP	2012/11/28 11:20:11	B	20.919	37.212	20.919	37.212	2	0	-129	70	3	8	401677476.110	0.000	1166	1838	739	52	1704	2012/11/28 11:19:37	1	18	117	211	44	80	119	201
5297	122198	NN	2012/11/28 13:39:33	B	20.918	37.210	20.918	37.210	1	0	-138	0	3	8	401677482.710	0.000	1833	2329	1442	55	2945	2012/11/28 13:39:34	1	18	117	212	44	80	114	200
5297	122198	NM	2012/11/29 06:15:48	A	20.898	37.218	20.898	37.218	3	0	-132	107	3	0	401677486.420	0.000	3475	13742	878	155	3784	2012/11/29 06:15:48	1	18	108	211	43	79	102	193
5297	122198	MA	2012/11/29 08:37:53	1	20.843	37.242	20.843	37.242	5	0	-123	360	3	50	401677470.250	0.000	569	1732	186	147	787	2012/11/29 08:39:46	1	18	108	211	45	74	106	205
5297	122198	NP	2012/11/29 09:28:33	B	20.845	37.243	20.845	37.243	1	0	-137	0	3	8	401677477.400	0.000	921	1095	774	139	1586	2012/11/29 09:28:34	1	18	111	211	45	81	106	201
5297	122198	NN	2012/11/29 11:50:44	B	20.848	37.247	20.848	37.247	1	0	-126	0	3	8	401677479.020	0.000	1341	1552	1158	99	2679	2012/11/29 11:50:44	1	18	108	211	47	73	106	206
5297	122198	NK	2012/11/29 14:40:57	B	20.859	37.244	20.859	37.244	2	0	-125	156	3	8	401677478.980	0.000	926	6639	129	64	2589	2012/11/29 14:39:39	1	18	109	210	46	72	106	199
5297	122198	MA	2012/11/30 08:14:26	B	20.932	37.207	20.932	37.207	2	0	-121	45	3	0	401677475.890	0.000	1328	4283	411	40	3740	2012/11/30 08:14:04	1	18	108	210	45	79	106	204
5297	122198	NP	2012/11/30 11:07:06	B	20.935	37.203	20.935	37.203	1	0	-125	0	3	8	401677473.680	0.000	1380	2133	893	44	3887	2012/11/30 11:07:06	1	18	111	211	44	80	106	71
5297	122198	NN	2012/11/30 11:38:50	A	20.933	37.194	20.933	37.194	3	0	-125	392	3	8	401677474.940	0.000	371	2204	62	30	981	2012/11/30 11:37:32	1	18	108	210	47	74	106	205
5297	122198	NK	2012/11/30 12:40:36	B	20.934	37.198	20.934	37.198	2	0	-130	110	3	8	401677473.130	0.000	1080	4275	272	178	3031	2012/11/30 12:39:41	1	18	109	210	48	72	106	199
5297	122198	NP	2012/11/30 12:45:56	B	20.937	37.204	20.937	37.204	1	0	-138	0	3	8	401677474.090	0.000	1563	2141	1140	43	4404	2012/11/30 12:45:56	1	18	109	210	47	71	106	200
5297	122198	NK	2012/11/30 14:16:16	B	20.934	37.204	20.934	37.204	2	0	-124	66	3	8	401677475.670	0.000	1317	4099	423	51	3705	2012/11/30 14:15:43	1	18	110	209	52	94	106	198
5297	122198	NP	2012/12/01 12:33:44	B	20.921	37.169	20.921	37.169	2	0	-134	101	3	0	401677478.190	0.000	1589	5728	440	153	4478	2012/12/01 12:32:04	1	18	104	209	52	77	102	212
5297	122198	NK	2012/12/01 13:50:54	B	20.936	37.163	20.936	37.163	1	0	-131	0	3	8	401677473.530	0.000	1911	5622	649	154	5391	2012/12/01 13:50:54	1	18	109	210	45	75	106	201
5297	122198	MA							1	0	-134	0			401650000.000	0.000						2013/01/15 05:46:55	1	19	115	207	41	82	110	154
5297	122198	NM							1	0	-134	0			401650000.000	0.000						2013/01/15 06:03:48	1	19	114	206	57	81	110	154
5297	122198	NL							1	0	-129	0			401650000.000	0.000						2013/01/15 06:03:48	1	19	114	214	173	107	94	181
5297	122198	MA							1	1	-117	0			401650000.000	0.000						2013/05/21 07:13:36	1	19	109	198	41	67	106	199
5297	122198	NL							1	0	-129	0			401650000.000	0.000						2013/05/21 07:13:36	1	19	97	198	41	67	106	199
5297	122199	NL	2012/09/26 02:39:42	3	47.679	-122.138	47.679	-122.138	9	0	-125	480	3	50	401677629.010	0.000	217	603	78	91	262	2012/09/26 02:43:13	3	00	123	210	71	85	122	143
5297	122199	NM	2012/09/26 02:39:56	3	47.677	-122.135	47.677	-122.135	11	4	-116	720	3	50	401677629.420	0.000	233	1493	36	80	227	2012/09/26 02:43:13	3	00	123	210	71	85	122	143
5297	122199	MA	2012/09/26 03:26:42	3	47.678	-122.137	47.678	-122.137	6	0	-121	420	3	58	401677630.370	0.000	244	587	101	105	340	2012/09/26 03:33:13	5	00	124	211	72	86	122	137
5297	122199	NM	2012/09/26 04:21:52	A	47.679	-122.136	47.679	-122.136	3	0	-129	180	3	0	401677630.360	0.000	208	689	62	82	193	2012/09/26 04:23:13	2	00	125	211	72	86	122	132
5297	122199	NL	2012/09/26 04:21:51	3	47.679	-122.136	47.679	-122.136	11	4	-116	660	3	58	401677630.630	0.000	202	684	59	82	190	2012/09/26 04:27:13	7	00	125	211	72	86	122	132
5297	122199	MA	2012/09/26 05:07:12	3	47.679	-122.137	47.679	-122.137	11	6	-107	600	3	58	401677630.710	0.000	226	1876	27	79	330	2012/09/26 05:14:13	4	00	126	212	72	86	126	129
5297	122199	NL	2012/09/26 06:04:12	A	47.678	-122.136	47.678	-122.136	3	0	-131	120	3	8	401677631.110	0.000	451	980	207	71	1229	2012/09/26 06:04:13	2	01	126	212	73	86	126	127
5297	122199	MA	2012/09/26 06:49:57	2	47.679	-122.140	47.679	-122.140	4	0	-123	240	3	68	401677631.640	0.000	390	1011	150	50	947	2012/09/26 06:52:13	3	01	119	212	73	86	118	125
5297	122199	NP	2012/11/04 12:19:03	A	20.934	37.265	11.305	-5.751	3	0	-131	254	0	60	401677613.970	0.000	729	3040	174	131	2564	2012/11/04 12:19:09	1	01	110	215	54	79	114	237
5297	122199	NK	2012/11/04 13:11:56	B	20.934	37.265	20.934	37.265	1	0	-122	0	3	8	401677611.080	0.000	1039	2446	441	130	2914	2012/11/04 13:11:56	1	01	118	215	61	71	114	229
5297	122199	NL	2012/11/05 05:13:40	0	20.956	37.276	20.956	37.276	4	0	-127	416	3	50	401677615.740	0.000	1633	6124	435	33	796	2012/11/05 05:15:56	1	01	119	215	58	82	114	229
5297	122199	NM	2012/11/05 05:40:51	B	20.938	37.269	20.938	37.269	1	0	-123	0	3	0	401677604.760	0.000	2184	3209	1485	121	6169	2012/11/05 05:40:52	1	01	119	214	60	73	114	227
5297	122199	NN	2012/11/05 11:11:04	A	20.933	37.306	20.933	37.306	3	0	-126	126	3	8	401677611.390	0.000	5374	34880	828	81	3720	2012/11/05 11:11:17	1	01	117	215	58	84	114	231
5297	122199	NP	2012/11/05 12:09:37	A	20.933	37.261	20.933	37.261	3	0	-128	353	3	8	401677614.560	0.000	625	1136	343	154	653	2012/11/05 12:09:52	1	01	117	213	61	72	114	234
5297	122199	NN	2012/11/05 12:52:07	B	20.933	37.252	20.933	37.252	1	0	-126	0	3	8	401677611.140	0.000	1046	1137	963	141	1417	2012/11/05 12:52:07	1	01	117	214	63	65	114	229
5297	122199	MA	2012/11/06 06:32:36	1	20.958	37.273	20.958	37.273	4	2	-117	152	3	50	401677612.810	0.000	1305	8345	204	84	1361	2012/11/06 06:34:13	1	02	115	214	60	71	110	240
5297	122199	NL	2012/11/06 06:48:19	B	20.958	37.271	20.958	37.271	1	0	-133	0	3	0	401677615.050	0.000	1054	2750	403	85	1550	2012/11/06 06:48:19	1	02	116	215	61	72	114	238
5297	122199	MA							1	0	-130	0			401650000.000	0.000						2012/11/09 05:29:02	1	06	121	214	62	82	119	223
5297	122199	MA	2012/11/09 07:09:44	A	20.930	37.204	20.930	37.204	3	0	-120	179	3	0	401677618.150	0.000	204	1316	31	97	469	2012/11/09 07:10:27	1	02	116	214	59	75	114	230
5297	122199	NL	2012/11/09 07:47:37	A	20.930	37.205	20.930	37.205	3	0	-128	143	3	8	401677616.160	0.000	595	1120	315	126	1034	2012/11/09 07:48:25	1	02	120	214	63	86	114	231
5297	122199	NN	2012/11/09 12:14:18	B	20.938	37.185	20.938	37.185	1	0	-125	0	3	8	401677614.000	0.000	1183	1309	1068	97	3326	2012/11/09 12:14:19	1	10	119	214	60	78	114	229
5297	122199	NK	2012/11/09 12:53:44	B	20.935	37.193	20.935	37.193	1	0	-129	0	3	8	401677612.670	0.000	1727	2668	1118	101	4293	2012/11/09 12:53:44	1	02	118	215	58	84	114	227
5297	122199	NL	2012/11/10 05:55:25	1	20.988	37.212	20.988	37.212	4	0	-125	247	3	50	401677614.940	0.000	629	4955	79	111	1424	2012/11/10 05:56:17	1	02	112	214	58	84	110	223
5297	122199	MA	2012/11/10 06:52:55	B	20.990	37.207	20.990	37.207	1	0	-124	0	3	8	401677614.400	0.000	769	1438	410	110	2149	2012/11/10 06:52:55	1	02	113	214	61	78	106	228
5297	122199	NL	2012/11/10 07:32:14	B	20.991	37.207	20.991	37.207	1	0	-126	0	3	8	401677611.840	0.000	887	1463	537	110	2486	2012/11/10 07:32:14	1	02	119	214	60	80	114	201
5297	122199	NP	2012/11/10 09:33:15	1	20.958	37.224	20.958	37.224	5	0	-129	486	3	58	401677619.040	0.000	554	1566	196	27	765	2012/11/10 09:36:55	1	03	118	214	59	79	118	227
5297	122199	NM	2012/11/11 05:05:09	1	20.887	37.235	20.887	37.235	6	0	-121	397	3	50	401677614.690	0.000	909	7081	116	101	618	2012/11/11 05:07:34	1	03	120	213	62	71	118	223
5297	122199	NL	2012/11/11 05:38:41	3	20.899	37.217	20.899	37.217	8	0	-123	559	3	50	401677616.750	0.000	207	290	147	56	234	2012/11/11 05:46:23	1	03	116	214	56	83	114	229
5297	122199	MA	2012/11/11 06:25:09	A	20.905	37.215	20.905	37.215	3	0	-121	568	3	8	401677616.430	0.000	728	2645	200	39	783	2012/11/11 06:25:35	1	03	117	214	60	79	114	231
5297	122199	NL	2012/11/11 07:22:03	B	20.908	37.207	20.908	37.207	2	0	-129	176	3	8	401677617.500	0.000	552	1974	154	125	1090	2012/11/11 07:22:03	1	03	118	215	59	79	114	231
5297	122199	NN	2012/11/11 11:43:00	2	20.885	37.210	20.885	37.210	5	0	-122	522	3	58	401677614.840	0.000	333	572	193	76	233	2012/11/11 11:48:17	1	03	117	212	69	63	114	232
5297	122199	NN	2012/11/11 13:30:40	A	20.895	37.198	20.895	37.198	3	0	-127	160	3	8	401677610.510	0.000	1144	2852	459	10	1258	2012/11/11 13:30:49	1	03	119	212	69	60	118	224
5297	122199	NK	2012/11/11 13:41:37	A	20.882	37.195	20.882	37.195	3	1	-119	327	3	0	401677619.350	0.000	423	2025	88	90	667	2012/11/11 13:37:44	1	03	120	213	62	73	118	224
5297	122199	NM	2012/11/11 14:32:01	B	20.884	37.191	20.884	37.191	1	0	-134	0	3	8	401677612.780	0.000	1023	1317	793	89	1527	2012/11/11 14:32:02	1	04	89	214	60	86	118	220
5297	122199	NK	2012/11/12 03:47:02	A	20.878	37.222	20.878	37.222	3	0	-128	272	3	0	401677616.610	0.000	357	876	145	5	959	2012/11/12 03:49:24	1	04	120	213	58	83	118	218
5297	122199	NM	2012/11/12 04:40:30	A	20.881	37.215	20.881	37.215	3	0	-124	185	3	8	401677618.510	0.000	2593	68225	98	107	4706	2012/11/12 04:40:01	1	04	113	213	61	84	110	218
5297	122199	NL	2012/11/12 05:24:27	B	20.877	37.224	20.877	37.224	1	0	-127	0	3	8	401677616.090	0.000	2426	11909	494	107	4402	2012/11/12 05:24:28	1	04	113	213	61	107	110	220
5297	122199	MA	2012/11/12 06:05:20	1	20.877	37.215	20.877	37.215	5	0	-120	459	3	58	401677613.870	0.000	543	1056	279	38	414	2012/11/12 06:10:27	1	04	113	213	61	74	110	221
5297	122199	NM	2012/11/12 06:17:20	B	20.877	37.215	20.877	37.215	1	0	-130	0	3	0	401677613.920	0.000	840	992	711	50	795	2012/11/12 06:17:20	1	04	113	213	62	72	110	222
5297	122199	NL	2012/11/12 07:13:36	B	20.871	37.224	20.871	37.224	2	0	-126	51	3	8	401677612.970	0.000	1357	1837	1002	82	1489	2012/11/12 07:13:11	1	04	120	214	63	71	118	226
5297	122199	MA	2012/11/12 07:49:04	1	20.882	37.228	20.882	37.228	6	2	-118	327	3	58	401677613.650	0.000	878	4373	176	104	578	2012/11/12 07:52:18	1	04	117	213	58	83	114	232
5297	122199	NP	2012/11/12 09:12:58	B	20.895	37.210	20.895	37.210	2	0	-133	134	3	8	401677614.810	0.000	1875	3254	1079	24	1424	2012/11/12 09:11:51	1	04	115	215	60	79	62	07
5297	122199	NN	2012/11/12 11:38:11	B	20.900	37.214	20.900	37.214	2	0	-124	87	3	8	401677608.010	0.000	2555	11584	563	173	1927	2012/11/12 11:37:28	1	05	120	214	61	75	114	229
5297	122199	NL	2012/11/13 05:15:48	2	20.897	37.216	20.897	37.216	5	0	-126	473	3	50	401677617.610	0.000	270	544	134	49	497	2012/11/13 05:21:14	1	05	123	213	61	75	118	217
5297	122199	MA	2012/11/13 05:43:10	1	20.894	37.219	20.894	37.219	4	0	-126	440	3	50	401677617.100	0.000	516	898	296	4	552	2012/11/13 05:49:42	1	05	122	212	67	66	118	216
5297	122199	NM	2012/11/13 05:52:36	1	20.898	37.218	20.898	37.218	5	0	-126	283	3	50	401677617.920	0.000	517	1058	252	155	504	2012/11/13 05:56:27	1	05	121	212	67	73	118	220
5297	122199	NL	2012/11/13 06:57:01	3	20.895	37.224	20.895	37.224	4	0	-122	173	3	58	401677620.810	0.000	200	300	133	17	407	2012/11/13 06:57:15	1	05	120	213	64	77	114	231
5297	122199	MA	2012/11/13 07:28:14	B	20.895	37.225	20.895	37.225	1	0	-129	0	3	8	401677624.970	0.000	422	443	400	73	1144	2012/11/13 07:28:15	1	05	119	213	61	75	118	225
5297	122199	NP	2012/11/13 10:45:07	3	20.911	37.208	20.911	37.208	5	0	-123	485	3	58	401677615.040	0.000	242	1826	32	76	582	2012/11/13 10:44:43	1	05	119	212	63	73	114	227
5297	122199	NN	2012/11/13 11:25:11	2	20.905	37.209	20.905	37.209	7	0	-124	436	3	58	401677619.080	0.000	367	940	142	46	317	2012/11/13 11:27:45	1	05	117	213	57	80	118	223
5297	122199	NM	2012/11/14 03:56:29	B	20.894	37.214	20.894	37.214	1	0	-136	0	3	0	401677619.290	0.000	5796	6068	5535	106	5988	2012/11/14 03:56:30	1	05	122	211	62	71	118	214
5297	122199	NL	2012/11/14 05:05:52	2	20.910	37.200	20.910	37.200	5	0	-128	316	3	60	401677614.370	0.000	307	751	125	22	808	2012/11/14 05:07:05	1	05	113	212	64	69	110	219
5297	122199	MA	2012/11/14 05:25:35	A	20.910	37.201	20.910	37.201	3	0	-131	105	3	0	401677613.700	0.000	410	603	278	15	1113	2012/11/14 05:25:32	1	06	116	212	63	95	110	220
5297	122199	NM	2012/11/14 05:28:37	B	20.910	37.200	20.910	37.200	1	0	-126	0	3	0	401677611.070	0.000	447	587	339	25	1221	2012/11/14 05:28:37	1	06	112	213	61	78	110	219
5297	122199	NL	2012/11/14 06:41:40	3	20.918	37.205	20.918	37.205	7	1	-119	621	3	68	401677616.230	0.000	140	225	86	102	218	2012/11/14 06:50:44	1	06	119	212	68	65	118	222
5297	122199	MA	2012/11/14 07:01:07	3	20.916	37.195	20.916	37.195	9	3	-116	727	3	50	401677615.260	0.000	209	542	80	102	283	2012/11/14 07:12:25	1	06	119	214	58	82	118	224
5297	122199	MA	2012/11/14 08:45:19	1	20.924	37.204	20.924	37.204	5	0	-126	226	3	58	401677618.340	0.000	862	2078	357	177	1103	2012/11/14 08:47:30	1	06	118	213	61	75	114	229
5297	122199	NM	2012/11/15 03:31:28	B	20.902	37.198	20.902	37.198	2	0	-134	46	3	0	401677616.220	0.000	2820	6195	1283	106	4973	2012/11/15 03:31:05	1	06	124	213	60	85	118	212
5297	122199	NL	2012/11/15 04:52:44	0	20.930	37.198	20.930	37.198	5	0	-130	299	3	58	401677620.830	0.000	1673	4058	689	17	1008	2012/11/15 04:53:45	1	06	114	212	65	76	110	216
5297	122199	NM	2012/11/15 05:09:42	2	20.926	37.195	20.926	37.195	4	0	-123	446	3	50	401677618.350	0.000	328	1543	69	108	363	2012/11/15 05:12:22	1	07	114	212	65	69	110	217
5297	122199	NL	2012/11/15 06:36:48	1	20.925	37.201	20.925	37.201	5	0	-125	391	3	58	401677616.900	0.000	899	8931	90	105	698	2012/11/15 06:38:46	1	07	112	212	63	70	110	222
5297	122199	MA	2012/11/15 06:41:48	3	20.925	37.197	20.925	37.197	7	2	-117	653	3	58	401677617.130	0.000	165	463	58	117	330	2012/11/15 06:50:42	1	07	115	213	63	82	110	227
5297	122199	NP	2012/11/15 10:23:38	B	20.932	37.196	20.932	37.196	2	0	-126	53	3	8	401677615.720	0.000	2361	11051	504	106	1925	2012/11/15 10:23:12	1	07	120	213	64	72	118	224
5297	122199	NN	2012/11/15 11:03:00	B	20.940	37.184	20.940	37.184	2	0	-128	193	3	8	401677610.600	0.000	421	1226	144	53	1135	2012/11/15 11:01:24	1	07	119	212	63	70	118	227
5297	122199	NP	2012/11/15 11:59:43	A	20.932	37.186	20.932	37.186	3	0	-131	176	3	8	401677616.460	0.000	1463	4476	477	78	1415	2012/11/15 12:00:12	1	07	120	213	63	67	118	224
5297	122199	NK	2012/11/16 03:52:26	B	20.930	37.206	20.930	37.206	2	0	-129	146	3	0	401677622.000	0.000	3779	23040	619	168	3673	2012/11/16 03:51:13	1	07	124	212	61	74	122	207
5297	122199	NL	2012/11/16 04:40:29	1	20.895	37.196	20.895	37.196	4	0	-131	227	3	50	401677606.750	0.000	1430	4974	411	19	2133	2012/11/16 04:40:40	1	07	114	212	60	79	114	212
5297	122199	NM	2012/11/16 04:46:31	1	20.927	37.205	20.927	37.205	6	0	-122	530	3	50	401677618.870	0.000	896	3145	255	100	719	2012/11/16 04:48:45	1	07	116	212	64	75	114	212
5297	122199	MA	2012/11/16 06:24:51	B	20.928	37.201	20.928	37.201	1	0	-128	0	3	8	401677618.390	0.000	2146	2684	1715	97	2002	2012/11/16 06:24:51	1	08	114	214	61	73	110	217
5297	122199	MA	2012/11/16 07:59:09	B	20.923	37.204	20.923	37.204	2	1	-118	467	3	8	401677616.030	0.000	1741	16696	181	59	1986	2012/11/16 07:59:09	1	08	120	213	65	71	118	224
5297	122199	NP	2012/11/16 11:46:57	B	20.921	37.198	20.921	37.198	1	0	-136	0	3	8	401677618.600	0.000	1258	1819	869	62	3539	2012/11/16 11:46:58	1	08	119	213	60	77	118	225
5297	122199	NN	2012/11/16 12:34:17	3	20.922	37.193	20.922	37.193	8	0	-121	516	3	58	401677617.380	0.000	170	367	78	81	190	2012/11/16 12:37:13	1	08	120	213	59	80	118	220
5297	122199	NK	2012/11/16 13:20:54	B	20.922	37.190	20.922	37.190	1	0	-126	0	3	8	401677617.900	0.000	663	741	592	87	1315	2012/11/16 13:20:54	1	08	116	212	61	80	110	217
5297	122199	NM	2012/11/17 04:23:35	B	20.924	37.194	20.924	37.194	1	0	-125	0	3	0	401677612.050	0.000	2676	2882	2485	106	5854	2012/11/17 04:23:36	1	08	120	212	61	81	114	205
5297	122199	NP	2012/11/17 09:59:44	B	20.951	37.180	20.951	37.180	1	0	-126	0	3	8	401677631.040	0.000	3901	10746	1416	100	9119	2012/11/17 09:59:44	1	08	112	212	61	82	110	220
5297	122199	NN	2012/11/17 10:43:08	B	20.952	37.204	20.952	37.204	1	0	-131	0	3	8	401677620.730	0.000	3135	8040	1222	100	8860	2012/11/17 10:43:09	1	08	115	213	64	84	110	220
5297	122199	NP	2012/11/17 11:43:18	1	20.974	37.231	20.974	37.231	5	0	-123	435	3	58	401677616.770	0.000	576	1183	280	120	323	2012/11/17 11:43:14	1	08	112	211	71	61	110	219
5297	122199	NN	2012/11/17 12:17:09	2	20.975	37.243	20.975	37.243	5	0	-124	623	3	58	401677616.690	0.000	394	1632	95	70	608	2012/11/17 12:22:12	1	08	113	212	65	68	110	217
5297	122199	NK	2012/11/17 12:55:30	2	20.961	37.234	20.961	37.234	7	0	-127	425	3	58	401677620.540	0.000	421	801	221	34	354	2012/11/17 12:57:43	1	09	116	212	63	79	110	218
5297	122199	NM	2012/11/18 03:58:57	B	20.911	37.308	20.911	37.308	1	0	-128	0	3	0	401677641.880	0.000	5478	6247	4802	124	5494	2012/11/18 03:58:58	1	09	119	210	65	87	226	211
5297	122199	NM	2012/11/18 05:36:54	2	20.916	37.212	20.916	37.212	5	0	-126	428	3	58	401677619.050	0.000	298	583	151	150	337	2012/11/18 05:39:22	1	09	122	212	65	67	118	214
5297	122199	NL	2012/11/18 05:55:23	1	20.915	37.217	20.915	37.217	5	0	-123	473	3	58	401677618.560	0.000	559	1501	207	65	315	2012/11/18 06:00:21	1	09	122	211	68	71	118	220
5297	122199	MA	2012/11/18 07:28:20	B	20.908	37.210	20.908	37.210	1	0	-125	0	3	8	401677615.660	0.000	2679	2908	2467	84	1893	2012/11/18 07:28:20	1	09	119	213	58	83	118	222
5297	122199	NL	2012/11/18 07:34:53	B	20.908	37.209	20.908	37.209	1	0	-128	0	3	8	401677617.110	0.000	2739	2970	2525	92	1935	2012/11/18 07:34:54	1	09	121	212	191	77	45	252
5297	122199	NM	2012/11/19 05:11:08	B	20.863	37.198	20.863	37.198	2	0	-124	49	3	0	401677630.260	0.000	1164	8252	164	59	3277	2012/11/19 05:10:44	1	09	124	212	62	74	122	210
5297	122199	NL	2012/11/19 05:47:36	B	20.851	37.179	20.851	37.179	1	0	-127	0	3	8	401677618.720	0.000	2035	12541	330	60	5748	2012/11/19 05:47:36	1	10	122	212	61	79	122	212
5297	122199	MA	2012/11/19 07:05:00	A	20.893	37.110	20.893	37.110	3	0	-120	234	3	8	401677613.970	0.000	6667	115648	384	116	4534	2012/11/19 07:07:08	1	10	117	212	62	78	110	216
5297	122199	NL	2012/11/19 07:22:46	2	20.866	37.181	20.866	37.181	4	0	-124	247	3	50	401677617.650	0.000	439	936	206	35	626	2012/11/19 07:25:57	1	10	113	211	63	70	110	216
5297	122199	MA	2012/11/19 08:40:26	A	20.863	37.179	20.863	37.179	3	0	-126	337	3	8	401677617.570	0.000	705	2190	227	2	1056	2012/11/19 08:44:55	1	10	114	212	63	86	110	222
5297	122199	NP	2012/11/19 09:37:42	1	20.847	37.179	20.847	37.179	7	0	-128	442	3	48	401677620.100	0.000	911	1901	436	31	400	2012/11/19 09:41:15	1	10	119	211	64	71	114	231
5297	122199	NP	2012/11/19 11:20:53	B	20.843	37.167	20.843	37.167	1	0	-128	0	3	8	401677622.840	0.000	3863	4538	3287	82	1914	2012/11/19 11:20:53	1	10	121	213	59	82	118	216
5297	122199	NN	2012/11/19 12:01:14	2	20.861	37.176	20.861	37.176	4	0	-122	211	3	58	401677616.000	0.000	291	663	127	52	333	2012/11/19 12:02:06	1	10	122	212	60	85	118	216
5297	122199	NM	2012/11/20 04:48:06	B	20.916	37.196	20.916	37.196	2	0	-124	263	3	0	401677642.400	0.000	1746	8443	361	3	3792	2012/11/20 04:45:55	1	10	123	212	60	82	122	210
5297	122199	NL	2012/11/20 05:31:41	2	20.856	37.180	20.856	37.180	5	0	-126	574	3	58	401677617.930	0.000	269	468	155	88	274	2012/11/20 05:37:52	1	10	123	212	63	86	118	213
5297	122199	MA	2012/11/20 06:37:34	3	20.849	37.183	20.849	37.183	10	2	-116	671	3	58	401677615.970	0.000	197	293	132	92	151	2012/11/20 06:46:48	1	11	120	210	70	64	118	220
5297	122199	NL	2012/11/20 07:14:24	2	20.845	37.190	20.845	37.190	6	0	-125	427	3	58	401677614.900	0.000	335	954	117	114	366	2012/11/20 07:18:55	1	11	125	211	67	92	118	222
5297	122199	MA	2012/11/20 08:21:05	B	20.854	37.189	20.854	37.189	2	0	-122	281	3	8	401677614.860	0.000	729	819	648	129	1694	2012/11/20 08:21:05	1	11	117	209	73	59	118	206
5297	122199	NP	2012/11/20 09:26:49	1	20.844	37.183	20.844	37.183	5	0	-128	376	3	48	401677614.940	0.000	1426	3250	625	14	637	2012/11/20 09:29:14	1	11	119	211	68	69	118	223
5297	122199	NP	2012/11/20 11:02:28	2	20.844	37.186	20.844	37.186	10	0	-123	727	3	58	401677616.930	0.000	328	674	160	71	184	2012/11/20 11:13:50	1	11	122	212	62	74	118	220
5297	122199	NM	2012/11/21 04:26:34	2	20.842	37.191	20.842	37.191	6	0	-126	652	3	50	401677620.110	0.000	349	1378	88	115	401	2012/11/21 04:28:58	1	11	115	211	62	73	114	209
5297	122199	NL	2012/11/21 05:21:11	3	20.839	37.189	20.839	37.189	4	0	-126	381	3	58	401677617.710	0.000	227	586	87	77	549	2012/11/21 05:22:11	1	11	116	211	64	72	114	212
5297	122199	NM	2012/11/21 06:06:53	B	20.834	37.185	20.834	37.185	2	0	-132	65	3	8	401677616.850	0.000	570	753	430	108	1274	2012/11/21 06:06:21	1	12	114	211	65	82	114	149
5297	122199	MA	2012/11/21 06:17:44	B	20.840	37.189	20.840	37.189	2	0	-120	66	3	8	401677617.880	0.000	550	917	329	75	1521	2012/11/21 06:17:11	1	12	114	210	65	69	110	214
5297	122199	NL	2012/11/21 07:01:11	2	20.837	37.186	20.837	37.186	7	0	-125	461	3	58	401677617.510	0.000	355	691	182	12	559	2012/11/21 07:06:09	1	12	111	211	61	79	110	223
5297	122199	MA	2012/11/21 08:03:17	B	20.840	37.189	20.840	37.189	1	0	-123	0	3	8	401677615.700	0.000	1922	2121	1741	93	1533	2012/11/21 08:03:17	1	12	115	212	60	77	110	218
5297	122199	NP	2012/11/21 09:16:32	1	20.849	37.183	20.849	37.183	4	0	-133	232	3	58	401677613.990	0.000	750	2001	281	27	1275	2012/11/21 09:17:54	1	12	112	211	60	83	110	220
5297	122199	NN	2012/11/21 13:16:18	B	20.859	37.178	20.859	37.178	1	0	-130	0	3	8	401677614.930	0.000	1341	1502	1197	38	3222	2012/11/21 13:16:19	1	12	118	212	61	86	114	209
5297	122199	NL	2012/11/22 06:47:15	B	20.878	37.192	20.878	37.192	2	0	-123	89	3	0	401677603.990	0.000	1466	28060	76	84	4133	2012/11/22 06:47:16	1	12	115	212	57	83	114	213
5297	122199	NN	2012/11/22 13:10:39	B	20.912	37.226	20.912	37.226	1	0	-127	0	3	8	401677647.870	0.000	1726	3399	876	97	4867	2012/11/22 13:10:40	1	12	115	212	58	82	114	212
5297	122199	NM	2012/11/23 05:19:24	2	20.927	37.172	20.927	37.172	7	0	-124	434	3	50	401677618.240	0.000	268	793	90	115	267	2012/11/23 05:22:32	1	12	116	210	64	72	114	209
5297	122199	MA	2012/11/23 05:38:28	1	20.925	37.160	20.925	37.160	5	0	-127	287	3	50	401677615.990	0.000	900	3219	251	34	1328	2012/11/23 05:42:20	1	12	116	211	60	78	114	209
5297	122199	NL	2012/11/23 06:39:06	B	20.926	37.159	20.926	37.159	1	0	-125	0	3	8	401677618.050	0.000	1129	1732	736	36	2080	2012/11/23 06:39:06	1	12	115	212	59	84	114	213
5297	122199	NM	2012/11/23 14:45:22	A	20.855	37.193	20.855	37.193	3	0	-130	204	3	8	401677607.220	0.000	2195	9291	518	32	2102	2012/11/23 14:45:37	1	12	115	211	59	82	114	209
5297	122199	NM	2012/11/24 04:56:03	B	20.789	37.186	20.789	37.186	2	0	-125	48	3	0	401677617.410	0.000	3152	20072	495	90	4186	2012/11/24 04:55:39	1	12	116	210	64	73	114	206
5297	122199	NK	2012/11/25 03:33:52	B	20.856	37.208	20.856	37.208	1	0	-130	0	3	0	401677578.620	0.000	4762	9508	2384	94	7741	2012/11/25 03:33:53	1	13	117	209	61	74	114	203
5297	122199	NM	2012/11/25 04:30:41	A	20.929	37.184	20.929	37.184	3	0	-125	377	3	6	401677619.100	0.000	486	3327	70	91	625	2012/11/25 04:29:12	1	77	117	210	38	66	226	220
5297	122199	NM	2012/11/25 06:10:02	1	20.927	37.193	20.927	37.193	4	0	-129	206	3	57	401677615.060	0.000	1326	5222	336	173	1834	2012/11/25 06:10:49	1	13	117	210	63	73	114	206
5297	122199	NL	2012/11/25 06:12:03	2	20.933	37.192	20.933	37.192	5	0	-123	520	3	50	401677617.900	0.000	251	699	90	98	252	2012/11/25 06:18:32	1	13	113	193	75	101	214	214
5297	122199	MA	2012/11/25 06:40:35	A	20.934	37.189	20.934	37.189	3	1	-116	423	3	0	401677618.120	0.000	303	694	132	48	411	2012/11/25 06:41:21	1	13	117	211	63	71	114	205
5297	122199	NL	2012/11/25 07:54:49	B	20.935	37.190	20.935	37.190	2	0	-131	75	3	8	401677620.250	0.000	616	674	562	78	1708	2012/11/25 07:54:49	1	13	116	211	60	80	114	209
5297	122199	MA	2012/11/25 08:21:14	1	20.931	37.202	20.931	37.202	4	0	-122	306	3	50	401677616.620	0.000	881	3084	251	130	778	2012/11/25 08:22:23	1	13	116	211	63	77	114	211
5297	122199	NP	2012/11/25 10:13:31	B	20.929	37.203	20.929	37.203	2	0	-125	67	3	8	401677617.460	0.000	1067	3115	365	86	1633	2012/11/25 10:12:58	1	13	116	211	65	72	114	212
5297	122199	NN	2012/11/25 12:28:50	3	20.928	37.196	20.928	37.196	11	0	-124	675	3	58	401677619.010	0.000	200	486	82	86	171	2012/11/25 12:38:36	1	13	118	210	63	72	114	205
5297	122199	NM	2012/11/26 05:47:28	B	20.922	37.186	20.922	37.186	1	0	-129	0	3	0	401677619.570	0.000	4581	6187	3391	86	5634	2012/11/26 05:47:29	1	14	119	211	60	85	114	203
5297	122199	NL	2012/11/26 06:00:56	1	20.925	37.182	20.925	37.182	4	0	-129	285	3	50	401677618.750	0.000	1054	6565	169	98	616	2012/11/26 06:04:45	1	14	117	211	60	81	114	207
5297	122199	NL	2012/11/26 07:45:17	B	20.925	37.186	20.925	37.186	1	0	-136	0	3	8	401677620.010	0.000	746	886	627	91	2081	2012/11/26 07:45:18	1	14	116	211	59	83	114	207
5297	122199	MA	2012/11/26 07:56:53	A	20.920	37.192	20.920	37.192	3	0	-120	255	3	8	401677617.770	0.000	189	322	110	159	410	2012/11/26 07:57:41	1	14	119	211	61	84	114	205
5297	122199	NP	2012/11/26 11:47:14	1	20.908	37.186	20.908	37.186	4	0	-125	400	3	58	401677620.800	0.000	660	2473	176	117	583	2012/11/26 11:46:45	1	14	116	210	60	81	114	207
5297	122199	NK	2012/11/26 14:15:35	B	20.910	37.187	20.910	37.187	2	0	-125	512	3	8	401677622.390	0.000	1143	10146	128	108	1769	2012/11/26 14:11:20	1	14	117	82	67	69	114	201
5297	122199	NL	2012/11/27 05:46:01	2	20.911	37.202	20.911	37.202	4	0	-124	406	3	50	401677618.800	0.000	425	523	345	100	255	2012/11/27 05:48:57	1	14	117	209	65	70	114	205
5297	122199	MA	2012/11/27 07:34:47	2	20.902	37.211	20.902	37.211	5	0	-121	508	3	58	401677617.030	0.000	276	689	110	107	235	2012/11/27 07:42:12	1	14	119	210	64	82	114	209
5297	122199	NK	2012/11/27 13:54:49	B	20.897	37.235	20.897	37.235	1	0	-120	0	3	8	401677623.690	0.000	2935	3943	2184	71	3397	2012/11/27 13:54:49	1	14	117	210	65	69	114	202
5297	122199	NN	2012/11/27 13:54:49	B	20.899	37.223	20.899	37.223	1	0	-134	0	3	0	401677617.130	0.000	3190	5859	1736	86	4263	2012/11/27 13:54:49	1	14	117	210	65	69	114	202
5297	122199	NL	2012/11/28 05:38:23	B	20.906	37.215	20.906	37.215	2	0	-125	152	3	0	401677620.820	0.000	1668	28622	97	79	4706	2012/11/28 05:37:08	1	14	119	211	57	83	58	160
5297	122199	MA	2012/11/28 05:38:23	B	20.904	37.213	20.904	37.213	2	0	-127	152	3	0	401677618.930	0.000	1614	9984	261	54	4555	2012/11/28 05:37:08	1	14	119	211	57	67	50	202
5297	122199	MA	2012/11/28 07:18:49	B	20.901	37.218	20.901	37.218	2	0	-120	90	3	8	401677616.190	0.000	768	3763	156	97	2148	2012/11/28 07:18:50	1	15	119	210	62	79	114	208
5297	122199	NL	2012/11/28 07:19:34	B	20.903	37.225	20.903	37.225	2	0	-127	90	3	0	401677612.170	0.000	918	4955	170	102	1845	2012/11/28 07:18:50	1	15	119	210	62	79	114	208
5297	122199	MA	2012/11/28 08:56:04	B	20.899	37.218	20.899	37.218	1	0	-128	0	3	8	401677617.190	0.000	1044	2048	532	97	2934	2012/11/28 08:56:05	1	15	115	208	71	73	107	91
5297	122199	NP	2012/11/28 09:42:14	B	20.899	37.218	20.899	37.218	1	0	-127	0	3	8	401677616.220	0.000	1132	2132	600	99	3182	2012/11/28 09:42:14	1	15	115	211	60	82	114	208
5297	122199	NK	2012/11/28 13:25:47	2	20.925	37.153	20.925	37.153	5	0	-125	322	3	58	401677622.350	0.000	462	2877	74	72	695	2012/11/28 13:26:41	1	15	118	208	69	65	118	199
5297	122199	NN	2012/11/28 13:45:37	B	20.925	37.151	20.925	37.151	2	0	-130	120	3	0	401677623.030	0.000	418	553	315	42	884	2012/11/28 13:43:38	1	15	119	210	61	80	118	200
5297	122199	NP	2012/11/28 23:58:47	3	20.913	37.210	20.913	37.210	7	0	-123	495	3	58	401677621.460	0.000	225	397	127	122	228	2012/11/29 00:02:20	1	15	122	209	62	75	118	192
5297	122199	NN	2012/11/29 00:33:40	2	20.912	37.208	20.912	37.208	8	0	-125	604	3	58	401677620.410	0.000	427	1591	114	94	313	2012/11/29 00:41:38	1	15	119	207	72	62	118	191
5297	122199	NK	2012/11/29 01:53:45	3	20.909	37.213	20.909	37.213	4	0	-124	379	3	58	401677621.480	0.000	160	255	100	133	261	2012/11/29 01:56:11	1	15	121	210	61	80	118	192
5297	122199	NL	2012/11/29 05:20:37	2	20.908	37.215	20.908	37.215	7	0	-122	575	3	58	401677620.100	0.000	403	719	226	60	288	2012/11/29 05:29:23	1	15	119	209	67	67	118	196
5297	122199	NM	2012/11/29 06:15:12	0	20.898	37.224	20.898	37.224	4	0	-126	227	3	58	401677620.450	0.000	1806	3744	870	5	987	2012/11/29 06:15:58	1	16	118	209	63	77	114	209
5297	122199	MA	2012/11/29 06:56:46	3	20.893	37.216	20.893	37.216	10	4	-116	518	3	58	401677617.750	0.000	149	231	95	86	200	2012/11/29 07:01:38	1	16	114	209	69	62	114	213
5297	122199	NL	2012/11/29 07:05:43	2	20.891	37.217	20.891	37.217	9	0	-124	426	3	50	401677617.430	0.000	271	748	98	120	242	2012/11/29 07:10:15	1	16	117	209	65	71	114	211
5297	122199	NL	2012/11/30 05:11:29	2	20.929	37.195	20.929	37.195	6	0	-126	424	3	50	401677620.280	0.000	436	869	218	177	463	2012/11/30 05:14:05	1	16	120	209	61	76	118	198
5297	122199	NM	2012/11/30 05:50:47	B	20.929	37.195	20.929	37.195	2	0	-127	278	3	8	401677617.850	0.000	706	2235	223	15	990	2012/11/30 05:48:29	1	16	118	208	83	68	114	139
5297	122199	MA	2012/11/30 06:37:26	B	20.932	37.195	20.932	37.195	2	0	-122	165	3	8	401677620.060	0.000	374	1820	77	93	1006	2012/11/30 06:36:04	1	16	117	209	67	69	114	204
5297	122199	MA	2012/11/30 08:18:03	B	20.925	37.192	20.925	37.192	2	0	-122	103	3	8	401677618.290	0.000	624	1946	199	106	1730	2012/11/30 08:17:12	1	16	118	211	59	78	118	200
5297	122199	NP	2012/11/30 09:20:22	B	20.923	37.191	20.923	37.191	1	0	-134	0	3	8	401677618.540	0.000	815	1401	474	104	2279	2012/11/30 09:20:23	1	17	115	210	61	75	114	213
5297	122199	NP	2012/11/30 11:02:22	A	20.928	37.196	20.928	37.196	3	0	-126	292	3	8	401677619.100	0.000	375	3764	37	76	994	2012/11/30 11:01:50	1	17	117	210	59	81	114	204
5297	122199	NK	2012/11/30 12:40:12	B	20.927	37.197	20.927	37.197	1	0	-131	0	3	8	401677618.580	0.000	768	1033	570	79	2137	2012/11/30 12:40:12	1	17	120	210	63	84	118	199
5297	122199	NN	2012/11/30 13:18:33	B	20.926	37.196	20.926	37.196	2	0	-127	66	3	8	401677619.580	0.000	736	1711	316	83	2044	2012/11/30 13:18:01	1	17	119	209	62	74	114	200
5297	122199	NK	2012/11/30 14:21:15	B	20.926	37.196	20.926	37.196	2	0	-126	292	3	8	401677619.000	0.000	726	7362	71	33	2014	2012/11/30 14:18:49	1	17	123	209	63	78	118	198
5297	122199	NL	2012/12/01 04:59:56	B	20.924	37.168	20.924	37.168	2	0	-130	115	3	0	401677615.500	0.000	1291	5398	308	4	3637	2012/12/01 04:58:59	1	17	119	208	64	70	118	196
5297	122199	NM	2012/12/01 05:25:09	B	20.927	37.168	20.927	37.168	1	0	-122	0	3	0	401677614.690	0.000	1352	4446	411	4	3810	2012/12/01 05:25:09	1	17	119	208	65	69	118	197
5297	122199	MA	2012/12/01 06:12:55	B	20.926	37.165	20.926	37.165	2	0	-121	153	3	8	401677613.150	0.000	1314	12468	138	1	3702	2012/12/01 06:12:55	1	17	117	210	60	78	114	201
5297	122199	NL	2012/12/01 06:43:52	B	20.928	37.164	20.928	37.164	1	0	-125	0	3	8	401677618.880	0.000	1295	5092	329	1	3649	2012/12/01 06:43:53	1	17	118	210	58	81	114	202
5297	122199	MA	2012/12/01 07:53:43	B	20.923	37.163	20.923	37.163	2	0	-120	197	3	8	401677609.720	0.000	682	6032	77	48	1898	2012/12/01 07:52:05	1	17	117	208	67	68	114	204
5297	122199	NP	2012/12/01 10:51:50	B	20.926	37.161	20.926	37.161	1	0	-125	0	3	8	401677619.210	0.000	1003	1595	630	70	2815	2012/12/01 10:51:51	1	17	118	208	64	80	114	211
5297	122199	NN	2012/12/01 11:30:20	B	20.927	37.163	20.927	37.163	1	0	-125	0	3	8	401677617.230	0.000	1108	1685	729	70	3113	2012/12/01 11:30:20	1	17	119	209	63	76	114	204
5297	122199	NN	2012/12/01 13:12:38	0	20.918	37.180	20.918	37.180	4	0	-126	460	3	48	401677622.700	0.000	1616	4112	635	132	486	2012/12/01 13:07:52	1	17	116	209	61	73	114	201
5297	122199	NK	2012/12/01 13:51:13	B	20.919	37.182	20.919	37.182	2	0	-128	71	3	8	401677619.320	0.000	2429	2874	2052	108	1257	2012/12/01 13:50:38	1	17	121	209	63	76	118	199
5297	122199	NM	2012/12/02 05:05:45	2	20.935	37.171	20.935	37.171	4	0	-127	303	3	50	401677619.790	0.000	307	1485	63	110	442	2012/12/02 05:06:37	1	17	120	208	61	73	118	197
5297	122199	MA	2012/12/02 05:54:11	B	20.937	37.164	20.937	37.164	2	0	-128	516	3	8	401677618.770	0.000	415	1353	127	19	995	2012/12/02 05:49:53	1	17	116	206	78	123	118	226
5297	122199	NL	2012/12/02 06:32:25	B	20.938	37.163	20.938	37.163	1	0	-126	0	3	8	401677618.880	0.000	563	765	414	22	1557	2012/12/02 06:32:25	1	18	119	209	64	73	118	200
5297	122199	MA	2012/12/02 07:29:36	B	20.932	37.167	20.932	37.167	2	0	-120	409	3	8	401677617.070	0.000	581	3143	107	45	1609	2012/12/02 07:29:37	1	18	118	208	66	67	114	203
5297	122199	NK	2012/12/02 13:33:06	A	20.932	37.172	20.932	37.172	3	0	-121	167	3	8	401677616.740	0.000	226	487	105	164	510	2012/12/02 13:32:43	1	18	120	208	63	73	118	198
5297	122199	NM	2012/12/02 14:33:48	B	20.931	37.172	20.931	37.172	1	0	-134	0	3	8	401677617.410	0.000	579	596	561	123	1587	2012/12/02 14:33:49	1	18	86	209	62	111	118	196
5297	122199	NM	2012/12/03 04:43:09	A	20.942	37.181	20.942	37.181	3	0	-129	304	3	0	401677620.630	0.000	1450	77007	27	101	4088	2012/12/03 04:43:33	1	18	121	209	61	86	118	195
5297	122199	MA	2012/12/03 05:31:50	B	20.942	37.182	20.942	37.182	2	0	-130	72	3	8	401677621.620	0.000	705	1427	348	110	1967	2012/12/03 05:31:15	1	18	117	208	67	70	118	197
5297	122199	NL	2012/12/03 07:58:26	B	20.938	37.184	20.938	37.184	2	0	-131	49	3	8	401677632.630	0.000	913	1413	589	138	2559	2012/12/03 07:58:02	1	18	120	208	64	74	114	203
5297	122199	NP	2012/12/03 10:24:33	A	20.895	37.197	20.895	37.197	3	0	-122	304	3	8	401677620.430	0.000	783	10069	60	90	2185	2012/12/03 10:26:59	1	18	116	207	69	65	114	208
5297	122199	NN	2012/12/03 11:07:07	A	20.892	37.239	20.892	37.239	3	0	-129	193	3	8	401677620.240	0.000	474	1081	207	19	921	2012/12/03 11:06:27	1	18	117	209	60	79	114	204
5297	122199	NP	2012/12/03 12:13:41	0	20.883	37.219	20.883	37.219	4	0	-129	243	3	58	401677625.800	0.000	1604	4228	608	11	998	2012/12/03 12:13:57	1	18	119	208	64	72	114	202
5297	122199	NN	2012/12/03 12:51:36	1	20.885	37.232	20.885	37.232	4	0	-125	591	3	58	401677620.970	0.000	827	3185	214	135	832	2012/12/03 12:43:37	1	18	117	208	67	68	114	202
5297	122199	NP	2012/12/04 10:18:41	B	20.842	37.497	20.842	37.497	1	0	-126	0	3	0	401677626.800	0.000	4196	6369	2764	99	6059	2012/12/04 10:18:41	1	19	116	208	63	71	114	209
5297	122199	NN	2012/12/04 10:53:09	Z	20.876	37.332	20.876	37.332	1	0	-134	0	2	8	401677616.290	0.000	22340	223109	2236	99	32275	2012/12/04 10:53:09	1	19	116	208	66	68	114	211
5297	122199	NP	2012/12/04 12:02:28	1	20.912	37.224	20.912	37.224	5	0	-128	440	3	58	401677615.510	0.000	847	1822	394	137	472	2012/12/04 12:02:52	1	19	115	207	68	67	114	210
5297	122199	NN	2012/12/04 12:38:48	2	20.910	37.230	20.910	37.230	8	0	-122	604	3	58	401677616.850	0.000	288	449	184	75	200	2012/12/04 12:40:30	1	19	116	208	68	67	114	208
5297	122199	NK	2012/12/04 12:41:18	2	20.910	37.230	20.910	37.230	4	0	-131	251	3	50	401677616.120	0.000	303	391	234	49	325	2012/12/04 12:41:33	1	19	121	209	62	76	114	207
5297	122199	NK	2012/12/04 14:25:11	2	20.906	37.233	20.906	37.233	5	0	-126	498	3	58	401677619.330	0.000	325	1359	77	120	699	2012/12/04 14:19:16	1	19	118	208	66	82	114	201
5297	122199	NM	2012/12/05 05:34:26	1	20.914	37.238	20.914	37.238	4	0	-122	340	3	50	401677618.320	0.000	641	1655	248	134	471	2012/12/05 05:35:35	1	19	117	208	63	71	114	204
5297	122199	NL	2012/12/05 05:49:43	A	20.912	37.236	20.912	37.236	3	0	-125	473	3	0	401677617.820	0.000	212	538	83	51	502	2012/12/05 05:50:34	1	19	115	206	72	63	114	203
5297	122199	MA	2012/12/05 06:29:00	3	20.914	37.242	20.914	37.242	9	1	-118	553	3	58	401677616.580	0.000	195	424	89	144	360	2012/12/05 06:36:01	1	20	116	208	63	71	114	213
5297	122199	NL	2012/12/05 07:31:18	3	20.920	37.243	20.920	37.243	5	0	-127	452	3	58	401677615.810	0.000	178	258	122	152	368	2012/12/05 07:34:37	1	20	116	208	65	69	114	213
5297	122199	NP	2012/12/05 11:51:27	B	20.937	37.243	20.937	37.243	1	0	-129	0	3	8	401677625.920	0.000	1068	1261	903	91	2997	2012/12/05 11:51:28	1	20	114	207	71	63	114	212
5297	122199	NM	2012/12/06 05:05:56	B	20.989	37.242	20.989	37.242	1	0	-125	0	3	0	401677633.200	0.000	2241	2930	1713	124	6331	2012/12/06 05:05:56	1	20	115	206	74	63	114	201
5297	122199	NL	2012/12/06 05:38:14	B	20.923	37.307	20.923	37.307	2	0	-125	478	3	0	401677626.900	0.000	1643	39171	68	56	4636	2012/12/06 05:38:15	1	20	116	207	68	66	114	204
5297	122199	MA	2012/12/06 06:05:53	A	20.895	37.261	20.895	37.261	3	0	-123	592	3	0	401677618.020	0.000	180	244	132	142	386	2012/12/06 06:12:11	1	20	117	209	60	77	114	203
5297	122199	MA	2012/12/06 07:49:39	B	20.899	37.264	20.899	37.264	1	1	-118	0	3	8	401677617.600	0.000	701	782	627	109	1954	2012/12/06 07:49:40	1	20	115	207	72	65	114	209
5297	122199	NK	2012/12/06 13:35:38	B	20.907	37.271	20.907	37.271	1	0	-124	0	3	8	401677611.890	0.000	1289	1829	908	71	3626	2012/12/06 13:35:39	1	20	119	208	60	80	114	205
5297	122199	NL	2012/12/07 05:29:15	3	20.899	37.241	20.899	37.241	4	0	-125	396	3	60	401677620.590	0.000	177	253	123	37	384	2012/12/07 05:30:23	1	20	118	206	68	73	118	201
5297	122199	MA	2012/12/07 05:53:59	B	20.900	37.241	20.900	37.241	1	0	-129	0	3	0	401677617.560	0.000	384	408	361	69	1037	2012/12/07 05:53:59	1	20	117	206	69	65	114	203
5297	122199	MA	2012/12/07 07:27:43	B	20.907	37.252	20.907	37.252	2	1	-118	444	3	8	401677619.700	0.000	557	2767	112	150	1539	2012/12/07 07:27:43	1	20	118	207	64	70	114	205
5297	122199	NP	2012/12/07 11:29:33	3	20.898	37.226	20.898	37.226	9	0	-125	529	3	58	401677617.880	0.000	199	303	130	105	176	2012/12/07 11:31:33	1	20	114	206	75	61	114	207
5297	122199	NN	2012/12/07 11:57:58	3	20.899	37.225	20.899	37.225	7	0	-124	547	3	50	401677617.270	0.000	225	669	75	64	269	2012/12/07 12:05:11	1	21	115	207	71	65	114	207
5297	122199	NK	2012/12/07 13:06:13	B	20.900	37.225	20.900	37.225	2	0	-126	97	3	8	401677616.730	0.000	737	1443	376	89	1314	2012/12/07 13:05:25	1	21	117	207	68	66	114	204
5297	122199	NN	2012/12/07 13:45:23	B	20.901	37.228	20.901	37.228	2	0	-129	50	3	8	401677617.710	0.000	1013	1186	865	173	1779	2012/12/07 13:44:59	1	21	115	207	67	82	114	203
5297	122199	NK	2012/12/07 14:48:19	B	20.902	37.228	20.902	37.228	1	0	-136	0	3	8	401677622.850	0.000	1230	1318	1147	179	2339	2012/12/07 14:48:19	1	21	117	207	71	64	118	199
5297	122199	NM	2012/12/08 04:22:23	B	20.910	37.231	20.910	37.231	1	0	-123	0	3	0	401677618.270	0.000	1711	3206	913	107	4830	2012/12/08 04:22:24	1	21	116	205	74	62	118	201
5297	122199	NL	2012/12/08 05:15:05	B	20.914	37.230	20.914	37.230	1	0	-128	0	3	8	401677621.340	0.000	1735	2968	1013	114	4896	2012/12/08 05:15:05	1	21	119	207	62	77	118	201
5297	122199	MA	2012/12/08 05:27:10	B	20.910	37.254	20.910	37.254	2	0	-129	179	3	8	401677619.790	0.000	1039	3990	270	169	2920	2012/12/08 05:27:10	1	21	116	206	71	64	114	204
5297	122199	MA	2012/12/08 08:51:44	B	20.910	37.278	20.910	37.278	1	0	-130	0	3	8	401677615.550	0.000	1419	2192	918	167	3999	2012/12/08 08:51:44	1	21	117	206	69	66	114	204
5297	122199	NN	2012/12/08 11:52:16	B	20.914	37.292	20.914	37.292	1	0	-122	0	3	8	401677618.550	0.000	1554	2832	852	92	4380	2012/12/08 11:52:16	1	21	120	207	64	72	114	204
5297	122199	NK	2012/12/08 12:42:42	B	20.921	37.276	20.921	37.276	2	0	-129	82	3	8	401677613.760	0.000	1411	6016	330	70	3972	2012/12/08 12:42:01	1	21	117	206	71	64	114	203
5297	122199	NN	2012/12/08 13:35:59	B	20.919	37.263	20.919	37.263	2	0	-129	157	3	8	401677615.910	0.000	912	4976	167	45	2551	2012/12/08 13:34:41	1	21	118	207	66	69	114	201
5297	122199	NK	2012/12/08 14:24:00	B	20.914	37.259	20.914	37.259	2	0	-126	362	3	8	401677619.770	0.000	425	3384	53	109	1135	2012/12/08 14:20:59	1	21	119	207	68	68	118	198
5297	122199	NM	2012/12/09 05:39:23	B	20.907	37.274	20.907	37.274	2	0	-128	362	3	0	401677621.200	0.000	1404	25899	76	144	3958	2012/12/09 05:36:23	1	21	117	205	70	65	118	201
5297	122199	NP	2012/12/09 11:00:58	B	20.904	37.271	20.904	37.271	1	0	-136	0	3	8	401677620.630	0.000	1839	3334	1014	143	5190	2012/12/09 11:00:58	1	21	117	206	67	67	118	201
5297	122199	NN	2012/12/09 11:42:05	A	20.916	37.258	20.916	37.258	3	0	-122	279	3	8	401677616.460	0.000	230	726	72	36	535	2012/12/09 11:43:01	1	21	117	205	70	64	114	203
5297	122199	NL	2012/12/10 04:55:02	B	20.970	37.155	20.970	37.155	1	0	-134	0	3	0	401677616.250	0.000	2090	2431	1796	112	5903	2012/12/10 04:55:03	1	21	118	206	64	70	118	201
5297	122199	MA	2012/12/10 06:27:38	B	20.923	37.227	20.923	37.227	1	0	-120	0	3	8	401677625.380	0.000	2876	6213	1330	102	8127	2012/12/10 06:27:38	1	21	117	206	68	67	118	201
5297	122199	NL	2012/12/11 06:22:03	B	20.878	37.393	20.878	37.393	2	0	-128	59	3	0	401677629.920	0.000	2890	69460	120	105	8159	2012/12/11 06:22:04	1	22	119	205	67	68	118	199
5297	122199	NL	2012/12/11 08:01:14	B	20.892	37.338	20.892	37.338	1	0	-131	0	3	8	401677617.530	0.000	6743	86861	523	105	16900	2012/12/11 08:01:15	1	22	118	205	67	102	118	201
5297	122199	NN	2012/12/11 11:17:10	B	20.875	37.361	20.875	37.361	1	0	-129	0	3	8	401677618.210	0.000	6246	50670	769	106	17557	2012/12/11 11:17:11	1	22	118	205	68	68	114	202
5297	122199	NK	2012/12/11 14:55:35	B	20.875	37.350	20.875	37.350	1	0	-126	0	3	8	401677614.170	0.000	6101	34631	1074	108	17255	2012/12/11 14:55:35	1	18	118	204	72	68	86	196
5297	122199	NM	2012/12/12 04:24:15	B	20.929	37.268	20.929	37.268	2	0	-121	61	3	0	401677612.250	0.000	4049	118093	138	92	11450	2012/12/12 04:23:45	1	22	113	205	65	65	110	190
5297	122199	MA	2012/12/12 05:44:16	1	20.913	37.202	20.913	37.202	4	0	-125	272	3	50	401677614.560	0.000	1476	3902	558	1	1117	2012/12/12 05:47:35	1	22	113	208	62	69	110	191
5297	122199	NL	2012/12/12 06:10:05	B	20.914	37.202	20.914	37.202	1	0	-123	0	3	0	401677611.010	0.000	1401	2113	928	179	1498	2012/12/12 06:10:06	1	22	114	206	69	62	110	187
5297	122199	NP	2012/12/12 10:28:59	2	20.920	37.238	20.920	37.238	6	0	-122	428	3	58	401677619.400	0.000	305	1657	56	72	370	2012/12/12 10:35:09	1	22	119	209	57	80	118	201
5297	122199	NN	2012/12/12 11:09:45	A	20.928	37.237	20.928	37.237	3	0	-129	154	3	8	401677614.780	0.000	1016	2353	438	115	944	2012/12/12 11:11:32	1	22	117	208	61	67	114	203
5297	122199	NP	2012/12/12 12:17:36	1	20.944	37.223	20.944	37.223	4	0	-132	394	3	58	401677614.570	0.000	926	2253	380	138	730	2012/12/12 12:17:26	1	22	120	208	60	73	118	199
5297	122199	NK	2012/12/12 12:47:23	1	20.933	37.230	20.933	37.230	5	0	-128	299	3	50	401677619.970	0.000	699	1745	280	21	624	2012/12/12 12:49:07	1	22	118	209	59	77	118	198
5297	122199	NN	2012/12/12 12:49:45	3	20.932	37.226	20.932	37.226	8	0	-122	529	3	50	401677620.290	0.000	230	370	142	107	186	2012/12/12 12:51:16	1	22	117	206	71	59	118	197
5297	122199	NM	2012/12/13 05:47:09	B	20.915	37.228	20.915	37.228	2	0	-131	45	3	0	401677628.500	0.000	3954	9904	1578	91	4647	2012/12/13 05:46:47	1	23	119	206	69	63	118	195
5297	122199	NL	2012/12/13 05:54:52	B	20.911	37.252	20.911	37.252	2	0	-125	118	3	0	401677632.560	0.000	745	5330	104	166	2081	2012/12/13 05:54:52	1	23	119	207	62	69	118	196
5297	122199	NN	2012/12/13 10:55:21	A	20.908	37.250	20.908	37.250	3	0	-129	181	3	8	401677616.700	0.000	777	3316	182	59	2168	2012/12/13 10:55:29	1	23	117	206	72	60	118	201
5297	122199	NN	2012/12/13 12:37:59	B	20.914	37.246	20.914	37.246	1	0	-133	0	3	8	401677621.070	0.000	1019	1976	525	60	2857	2012/12/13 12:37:59	1	23	118	205	70	61	118	198
5297	122199	NL	2012/12/14 05:45:04	B	20.939	37.217	20.939	37.217	2	0	-125	55	3	0	401677630.930	0.000	1334	8444	210	63	3759	2012/12/14 05:44:37	1	23	122	207	59	76	118	189
5297	122199	MA	2012/12/14 06:44:55	B	20.941	37.213	20.941	37.213	2	2	-117	139	3	8	401677630.240	0.000	1248	22073	70	54	3515	2012/12/14 06:44:56	1	23	120	207	58	72	118	191
5297	122199	NL	2012/12/14 07:29:41	B	20.939	37.206	20.939	37.206	1	0	-131	0	3	8	401677621.880	0.000	1113	3614	342	54	3129	2012/12/14 07:29:41	1	23	120	206	65	65	118	192
5297	122199	NN	2012/12/14 14:07:44	B	20.945	37.181	20.945	37.181	1	0	-136	0	3	8	401677615.530	0.000	1708	2572	1134	61	4816	2012/12/14 14:07:45	1	23	121	207	60	71	118	188
5297	122199	NM	2012/12/14 14:49:02	B	20.942	37.192	20.942	37.192	2	0	-131	143	3	8	401677616.110	0.000	1236	6691	228	171	3473	2012/12/14 14:47:51	1	23	121	207	63	67	118	186
5297	122199	NP	2012/12/15 11:45:45	B	20.960	37.116	20.960	37.116	1	0	-129	0	3	0	401677612.150	0.000	2386	2928	1943	118	6740	2012/12/15 11:45:46	1	23	119	205	68	63	118	189
5297	122199	NN	2012/12/15 12:10:27	0	20.935	37.196	20.935	37.196	5	0	-126	424	3	50	401677619.810	0.000	1640	30910	87	76	1190	2012/12/15 12:16:47	1	19	120	205	70	66	84	174
5297	122199	NK	2012/12/15 14:53:09	B	20.936	37.197	20.936	37.197	2	0	-126	212	3	8	401677620.320	0.000	1925	17282	214	102	1976	2012/12/15 14:51:23	1	23	122	207	61	71	122	185
5297	122199	NM	2012/12/16 04:35:58	B	20.950	37.200	20.950	37.200	2	0	-126	142	3	0	401677622.750	0.000	1616	12907	202	114	4559	2012/12/16 04:34:48	1	23	123	204	68	64	122	177
5297	122199	NL	2012/12/16 05:20:35	B	20.948	37.204	20.948	37.204	2	0	-127	442	3	8	401677621.160	0.000	449	1795	112	28	1116	2012/12/16 05:16:54	1	24	123	205	72	63	122	181
5297	122199	MA	2012/12/16 06:03:29	B	20.935	37.197	20.935	37.197	1	0	-125	0	3	8	401677615.560	0.000	1376	5351	353	29	3878	2012/12/16 06:03:29	1	24	122	206	66	66	122	181
5297	122199	NL	2012/12/16 07:00:42	B	20.949	37.201	20.949	37.201	2	0	-126	272	3	8	401677625.060	0.000	517	5407	49	110	1422	2012/12/16 07:00:42	1	24	124	206	63	69	122	181
5297	122199	NP							1	0	-129	0			401650000.000	0.000						2012/12/17 09:40:07	1	24	115	204	65	66	114	184
5297	122199	NK							1	0	-127	0			401650000.000	0.000						2012/12/17 14:01:43	1	24	115	206	63	70	114	183
5297	122199	NN	2012/12/18 11:43:28	B	20.906	37.234	20.906	37.234	2	0	-124	74	3	0	401677618.140	0.000	1242	9391	164	10	3423	2012/12/18 11:42:52	1	24	117	205	65	68	114	179
5297	122199	NN	2012/12/18 13:26:28	B	20.905	37.232	20.905	37.232	2	0	-131	430	3	8	401677619.640	0.000	629	4643	85	132	1738	2012/12/18 13:19:18	1	24	115	205	68	67	114	185
5297	122199	NK	2012/12/18 13:36:55	B	20.889	37.230	20.889	37.230	2	0	-130	94	3	0	401677621.050	0.000	765	914	640	130	2129	2012/12/18 13:36:08	1	24	115	206	66	67	114	185
5297	122199	NM	2012/12/19 05:00:52	B	20.936	37.231	20.936	37.231	1	0	-134	0	3	0	401677624.720	0.000	1756	3731	826	100	4957	2012/12/19 05:00:53	1	24	116	202	69	64	114	177
5297	122199	NN							1	0	-126	0			401650000.000	0.000						2013/02/13 11:26:43	1	189	46	241	87	12	86	74	90	08	244	63	78	157	154	108	209	23	220	237	211	23	68	54	208	82	81
[truncated: 1 more columns]
